# Supplementary material for: Access to azonanes via Pd-catalyzed decarboxylative [5 + 4] cycloaddition with exclusive regioselectivity
Source: Royal Society of Chemistry journal article supplement (doi:10.1039/d1qo01405f), 2021-01-01

*Supporting Information*

**The Access to Azonanes via Pd-Catalyzed Decarboxylative [5 +  
4] Cycloaddition with Exclusive Regioselectivity**

Yin Liu,<sup>a,b,&</sup> Yicheng He,<sup>b,&</sup> Yang Liu,<sup>b</sup> Kun Wei,<sup>a</sup> and Wusheng Guo<sup>b,c,\*</sup>

<sup>a</sup> *School of biology and Biological Engineering, South China University of  
Technology, Guangzhou 510640, China.*

<sup>b</sup> *Frontier Institute of Science and Technology (FIST), Xi'an Jiaotong University,  
Xi'an 710045, China*

<sup>c</sup> *School of Chemistry, Xi'an Key Laboratory of Sustainable Energy Material  
Chemistry, and MOE Key Laboratory for Nonequilibrium Synthesis and Modulation  
of Condensed Matter, Xi'an Jiaotong University, Xi'an 710049, China.*

*E-mail: wusheng.guo@mail.xjtu.edu.cn*

*& These authors contributed equally to the present work*

## Contents

|            |                                                                 |
|------------|-----------------------------------------------------------------|
| <b>S3</b>  | <b>General comments</b>                                         |
| <b>S4</b>  | <b>Optimized procedure for the formation of 3aa</b>             |
| <b>S4</b>  | <b>Gram-scale reactions and synthetic transformation of 3aa</b> |
| <b>S5</b>  | <b>Control experiment</b>                                       |
| <b>S5</b>  | <b>Characterization data of all the products</b>                |
| <b>S20</b> | <b>X-ray molecular structures of 3aa</b>                        |
| <b>S41</b> | <b>References</b>                                               |
| <b>S42</b> | <b>Characterization spectra of all products</b>                 |

## General comments

Commercially available reagents were purchased from Energy, J&K, Strem, Alfa Aesar or TCI, and used without further purification unless otherwise stated. The catalyst were purchased from Strem and were stored in fridge (<-20 °C). Solvents were purchased from Energy and used directly without further purification.

<sup>1</sup>H NMR, <sup>13</sup>C NMR, <sup>19</sup>F NMR spectra were measured on Bruker Avance 400MHz instrument and chemical shifts (δ) are reported in parts per million (ppm). Chemical shifts were reported in ppm on the δ scale relative to CHCl<sub>3</sub> (δ = 7.26 for <sup>1</sup>H NMR, δ = 77.16 for <sup>13</sup>C NMR). Coupling constants were reported in Hz with multiplicities denoted as s (singlet), d (doublet), t (triplet), q (quartet), m (multiplet). Infrared spectra was collected on a Bruker ALPHA II spectrometer. Absorption maxima (ν max) was reported in wavenumbers (cm<sup>-1</sup>). High-resolution ESI mass spectra (HRMS) were determined on WATERS I-Class VION IMS Q Tof LC/MS. Single crystal X-ray diffraction analyses were collected at 100 K on a Rigaku Oxford Diffraction Supernova Dual Source, Cu at Zero equipped with an AtlasS2 CCD using Cu Kα radiation.

All reactions were monitored by thin layer chromatography (TLC) and visualized by UV irradiation or stained with potassium permanganate or 20-30% ethanolic phosphomolybdic acid (PMA) followed by brief heating with a heating gun. Column chromatography was performed on silica gel (200-300 mesh) using a mixture of petroleum ether/ethyl acetate or petroleum ether/dichloromethane as the eluent. The substituted carbonates **1** and 1-azadiene **2** were prepared according to reported procedures.<sup>[1-2]</sup>

### Typical reaction procedure for the formation of **3aa**

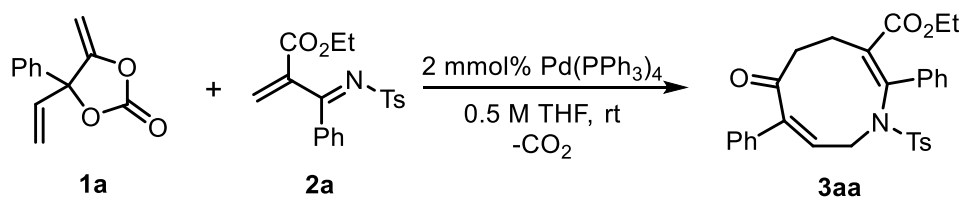

A screw-capped vial was charged with carbonate **1a** (20.2 mg, 0.1 mmol, 1.0 equiv), 1-azadiene **2a** (39.3 mg, 0.11 mmol, 1.1 equiv), and Pd(PPh<sub>3</sub>)<sub>4</sub> (2.3 mg, 0.002 mmol, 2 mol%) in THF (0.2 mL). The reaction mixture was stirred at room temperature for 3 h. Upon the reaction was finished, the mixture was purified directly by flash chromatography on silica gel to afford the pure product **3aa** (PE:EA = 5:1, R<sub>f</sub> = 0.31).

### Gram-scale reaction and selective reduction of **3aa**

#### Gram-scale synthesis of **3aa**:

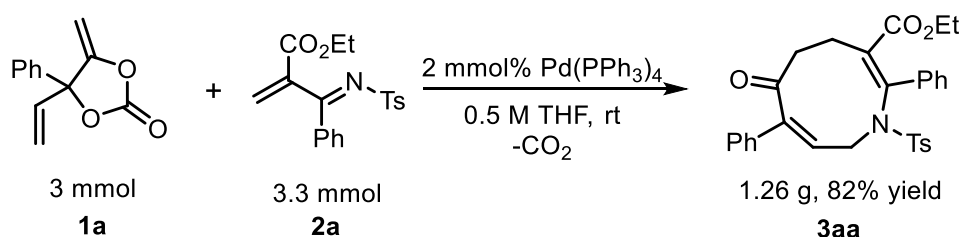

A 25 mL of round-bottom flask was charged with carbonate **1a** (606 mg, 3 mmol, 1.0 equiv), azadiene (1.17 mg, 3.3 mmol, 1.1 equiv), and Pd(PPh<sub>3</sub>)<sub>4</sub> (70 mg, 0.06 mmol, 2 mol%) in THF (6 mL). The reaction mixture was stirred at room temperature. After full conversion was noted, the mixture was purified directly by flash chromatography (PE/EA = 5:1, R<sub>f</sub> = 0.34) on silica gel to afford the product **3aa** (1.26 g, 82%) as a white solid.

#### Selective reduction of **3aa**:

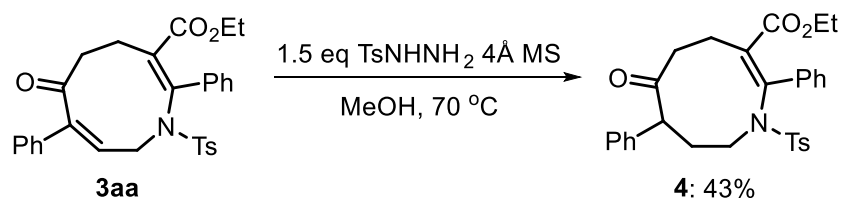

A screw-capped vial was charged with nine-membered *N*-heterocycle **3aa** (51.5 mg, 0.1 mmol, 1.0 equiv), TsNHNH<sub>2</sub> (27.9 mg, 0.15 mmol, 1.5 equiv) and 4 Å Molecular sieves (100 mg) in MeOH (2.0 mL). The reaction mixture was stirred at 70 °C for 10 h. Upon full conversion was noted, the mixture was purified directly by flash

chromatography (PE/EA = 5:1,  $R_f$  = 0.43) on silica gel to afford the product **4** as a yellow oil.

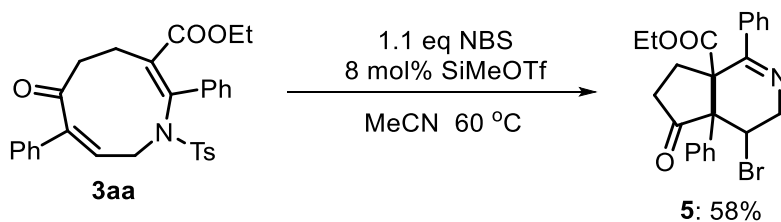

A 1 mL screw-capped vial was charged with nine-membered azonane **3aa** (51.5 mg, 0.1 mmol, 1.0 equiv), SiMeOTf (1.8 mg, 8 mol%) and NBS (19.6 mg, 0.11 mmol, 1.1 equiv) in MeCN (2.0 mL). The reaction mixture was stirred at 60 °C for 28 h. After full conversion was noted, the mixture was purified by flash chromatography (PE/EA) on silica gel to afford the product **5** (PE : EA = 5 : 1,  $R_f$  = 0.47) as a white solid.

#### Control experiment:

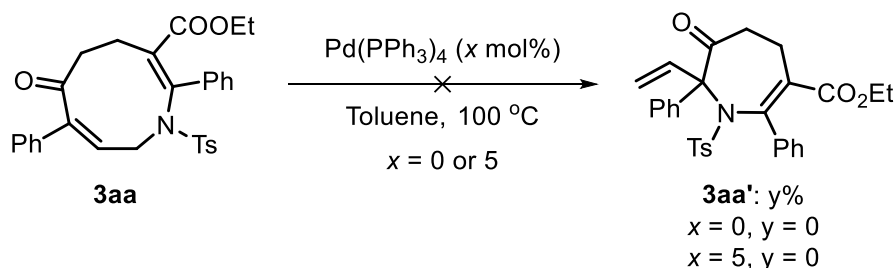

#### Characterization data of all the new products

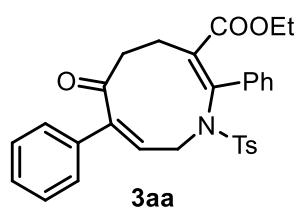

#### Ethyl(2*E*,7*Z*)-6-oxo-2,7-diphenyl-1-tosyl-4,5,6,9-tetrahydro-1*H*-azonine-3-carboxylate (**3aa**)

The title compound was prepared according to the standard procedure and isolated as a white solid (48.0 mg, 92%), m.p. = 161.9-163.5 °C.  $^1\text{H NMR}$  (400 MHz,  $\text{CDCl}_3$ )  $\delta$  7.35 (d,  $J$  = 7.6 Hz, 2H), 7.31-7.09 (m, 12H), 6.01 (t,  $J$  = 8.0 Hz, 1H), 4.25 (dd,  $J$  = 13.7, 7.2 Hz, 1H), 3.96 (dd,  $J$  = 13.3, 9.5 Hz, 1H), 3.77-3.58 (m, 2H), 2.76-2.64 (m, 1H), 2.56 (t,  $J$  = 13.7 Hz, 1H), 2.51-2.42 (m, 1H), 2.35 (s, 3H), 2.33-2.24 (m, 1H), 0.59 (t,  $J$  = 6.9 Hz, 3H).  $^{13}\text{C NMR}$  (101 MHz,  $\text{CDCl}_3$ , one carbon signal was overlapped)  $\delta$  208.4, 169.1, 149.7, 144.1, 138.4, 135.8, 134.0, 133.0, 129.7, 129.2, 129.1, 129.0, 128.7, 128.2, 127.6, 126.5, 120.6, 61.1, 48.8, 41.0, 27.6, 21.7, 13.4. HRMS (ESI)  $m/z$ :

(M+H)<sup>+</sup> calcd. for C<sub>30</sub>H<sub>30</sub>NO<sub>5</sub>S 516.1845, found: 516.1847. IR  $\nu_{\max}/\text{cm}^{-1}$  3058, 3029, 2980, 2931, 1701, 1597, 1350, 1297, 1161, 1091, 799, 766.

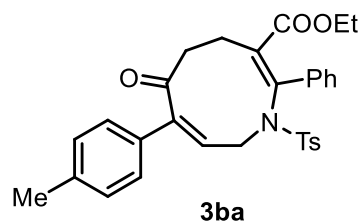

**Ethyl(2*E*,7*Z*)-6-oxo-2-phenyl-7-(*p*-tolyl)-1-tosyl-4,5,6,9-tetrahydro-1*H*-azonine-3-carboxylate (3ba)**

The title compound was prepared according to the standard procedure and isolated as a white solid (39.7 mg, 75%), m.p. = 166.9-168.5 °C. <sup>1</sup>H NMR (400 MHz, CDCl<sub>3</sub>)  $\delta$  7.41 (d, *J* = 8.2 Hz, 2H), 7.35 – 7.30 (m, 1H), 7.28 – 7.23 (m, 2H), 7.22 – 7.16 (m, 4H), 7.16 – 7.07 (m, 4H), 6.04 (t, *J* = 8.2 Hz, 1H), 4.31 (dd, *J* = 13.8, 7.4 Hz, 1H), 4.03 (dd, *J* = 13.8, 9.2 Hz, 1H), 3.82 – 3.67 (m, 2H), 2.82 – 2.71 (m, 1H), 2.68 – 2.48 (m, 2H), 2.41 (s, 3H), 2.39 – 2.33 (m, 1H), 2.33 (d, *J* = 7.1 Hz, 3H), 0.66 (t, *J* = 7.1 Hz, 3H). <sup>13</sup>C NMR (101 MHz, CDCl<sub>3</sub>)  $\delta$  208.6, 169.1, 149.6, 144.2, 144.1, 139.3, 138.4, 135.8, 133.0, 131.1, 129.7, 129.7, 129.1, 128.7, 128.2, 127.6, 126.4, 119.7, 61.0, 48.9, 41.0, 27.6, 21.7, 21.4, 13.4. HRMS (ESI) *m/z*: (M+H)<sup>+</sup> calcd. for C<sub>31</sub>H<sub>32</sub>NO<sub>5</sub>S 530.2001, found: 530.2001. IR  $\nu_{\max}/\text{cm}^{-1}$  3055, 3028, 2980, 2924, 1701, 1598, 1350, 1239, 1161, 1091, 1040, 815, 767.

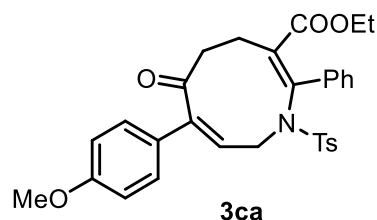

**Ethyl(2*E*,7*Z*)-7-(4-methoxyphenyl)-6-oxo-2-phenyl-1-tosyl-4,5,6,9-tetrahydro-1*H*-azonine-3-carboxylate (3ca)**

The title compound was prepared according to the standard procedure and isolated as a white solid (42.0 mg, 77%), m.p. = 135.8-137.6 °C. <sup>1</sup>H NMR (400 MHz, CDCl<sub>3</sub>)  $\delta$  7.41 (d, *J* = 8.2 Hz, 2H), 7.35 – 7.31 (m, 1H), 7.29 – 7.24 (m, 2H), 7.24 – 7.13 (m, 6H), 6.82 (d, *J* = 8.7 Hz, 2H), 5.98 (t, *J* = 8.3 Hz, 1H), 4.32 (dd, *J* = 13.7, 7.3 Hz, 1H), 4.01 (dd, *J* = 13.7, 9.4 Hz, 1H), 3.78 (s, 3H), 3.77 – 3.69 (m, 2H), 2.83 – 2.71 (m, 1H), 2.64 – 2.50 (m, 2H), 2.41 (s, 3H), 2.40 – 2.30 (m, 1H), 0.66 (t, *J* = 7.1 Hz, 3H). <sup>13</sup>C NMR (101 MHz, CDCl<sub>3</sub>)  $\delta$  208.6, 169.0, 160.5, 149.3, 144.0, 138.5, 135.9, 132.9, 129.7, 129.0, 128.7, 128.2, 127.9, 127.6, 126.8, 126.4, 118.6, 114.3, 61.0, 55.4, 48.9, 41.0, 27.6, 21.7, 13.4. HRMS (ESI) *m/z*: (M+H)<sup>+</sup> calcd. for C<sub>31</sub>H<sub>32</sub>NO<sub>6</sub>S 546.1950, found:

546.1948. IR  $\nu_{\max}/\text{cm}^{-1}$  3059, 3030, 2979, 2959, 2934, 2839, 1699, 1603, 1494, 1349, 1251, 1160, 1090, 1033, 852, 766.

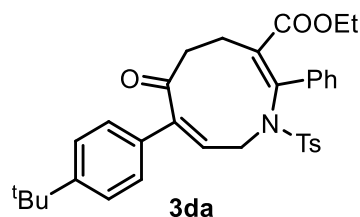

**Ethyl(2*E*,7*Z*)-7-(4-(tert-butyl)phenyl)-6-oxo-2-phenyl-1-tosyl-4,5,6,9-tetrahydro-1*H*-azonine-3-carboxylate (3da)**

The title compound was prepared according to the standard procedure and isolated as a white solid (46.3 mg, 81%), m.p. = 173.5-176.8 °C.  $^1\text{H}$  NMR (400 MHz,  $\text{CDCl}_3$ )  $\delta$  7.43 (d,  $J$  = 8.2 Hz, 2H), 7.36-7.29 (m, 3H), 7.28-7.15 (m, 8H), 6.05 (t, 1H), 4.31 (dd,  $J$  = 13.8, 7.3 Hz, 1H), 4.03 (dd,  $J$  = 13.8, 9.2 Hz, 1H), 3.84-3.59 (m, 2H), 2.80-2.71 (m, 1H), 2.67-2.51 (m, 2H), 2.47-2.32 (m, 4H), 1.28 (s, 9H), 0.65 (t,  $J$  = 7.1 Hz, 3H).  $^{13}\text{C}$  NMR (101 MHz,  $\text{CDCl}_3$ , one carbon signal was overlapped)  $\delta$  208.5, 169.1, 152.4, 149.6, 144.1, 138.4, 135.9, 133.1, 131.0, 129.7, 129.1, 128.7, 128.2, 127.6, 126.2, 125.9, 119.5, 61.0, 48.9, 41.0, 34.8, 31.3, 27.6, 21.7, 13.3. HRMS (ESI)  $m/z$ : ( $\text{M}+\text{H}$ ) $^+$  calcd. for  $\text{C}_{34}\text{H}_{38}\text{NO}_5\text{S}$  572.2471, found: 572.2474. IR  $\nu_{\max}/\text{cm}^{-1}$  3059, 3031, 2962, 2905, 2869, 1698, 1598, 1350, 1298, 1160, 1090, 1040, 853, 765.

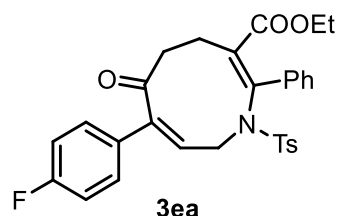

**Ethyl(2*E*,7*Z*)-7-(4-fluorophenyl)-6-oxo-2-phenyl-1-tosyl-4,5,6,9-tetrahydro-1*H*-azonine-3-carboxylate (3ea)**

The title compound was prepared according to the standard procedure and isolated as a white solid (45.4 mg, 85%), m.p. = 145.2-148.8 °C.  $^1\text{H}$  NMR (400 MHz,  $\text{CDCl}_3$ )  $\delta$  7.40 (d,  $J$  = 7.9 Hz, 2H), 7.33 (t,  $J$  = 7.2 Hz, 1H), 7.29-7.16 (m, 8H), 7.00 (t,  $J$  = 8.5 Hz, 2H), 6.02 (t,  $J$  = 8.2 Hz, 1H), 4.32 (dd,  $J$  = 13.8, 7.3 Hz, 1H), 4.01 (dd,  $J$  = 13.7, 9.3 Hz, 1H), 3.86-3.65 (m, 2H), 2.84-2.72 (m, 1H), 2.66-2.50 (m, 2H), 2.41 (s, 3H), 2.40-2.32 (m, 1H), 0.68 (t,  $J$  = 7.1 Hz, 3H).  $^{13}\text{C}$  NMR (101 MHz,  $\text{CDCl}_3$ )  $\delta$  208.0, 169.0, 163.4 (d,  $J$  = 249.5 Hz), 148.7, 144.1, 144.0, 138.3, 135.8, 132.8, 130.1 (d,  $J$  = 3.3 Hz), 129.7, 129.2, 128.7, 128.4 (d,  $J$  = 8.3 Hz), 128.2, 127.6, 120.6, 116.0 (d,  $J$  = 21.8 Hz), 61.1, 48.7, 40.9, 27.5, 21.7, 13.4.  $^{19}\text{F}$  NMR (376 MHz,  $\text{CDCl}_3$ )  $\delta$  -111.91. HRMS (ESI)  $m/z$ : ( $\text{M}+\text{H}$ ) $^+$  calcd. for  $\text{C}_{30}\text{H}_{29}\text{FNO}_5\text{S}$  534.1750, found: 534.1751. IR  $\nu_{\max}/\text{cm}^{-1}$  3060, 3029, 2981, 2928, 1699, 1599, 1509, 1349, 1298, 1160, 1041, 961, 834, 766, 681.

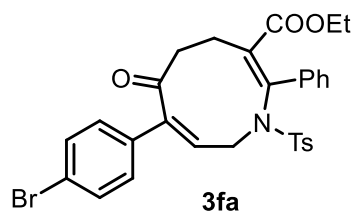

**Ethyl(2E,7Z)-7-(4-bromophenyl)-6-oxo-2-phenyl-1-tosyl-4,5,6,9-tetrahydro-1H-azonine-3-carboxylate (3fa)**

The title compound was prepared according to the standard procedure and isolated as a white solid (54.7 mg, 92%), m.p. = 168.1-170.8 °C. <sup>1</sup>H NMR (400 MHz, CDCl<sub>3</sub>) δ 7.45-7.39 (m, 4H), 7.34-7.29 (m, 1H), 7.28-7.24 (m, 2H), 7.21-7.15 (m, 4H), 7.14-7.09 (m, 2H), 6.08 (dd, *J* = 9.0, 7.5 Hz, 1H), 4.30 (dd, *J* = 13.9, 7.3 Hz, 1H), 4.01 (dd, *J* = 13.8, 9.2 Hz, 1H), 3.83-3.68 (m, 2H), 2.84-2.73 (m, 1H), 2.69-2.58 (m, 1H), 2.58-2.49 (m, 1H), 2.41 (s, 3H), 2.39-2.32 (m, 1H), 0.68 (t, *J* = 7.1 Hz, 3H). <sup>13</sup>C NMR (101 MHz, CDCl<sub>3</sub>) δ 207.8, 168.9, 148.5, 144.1, 144.1, 138.1, 135.6, 132.9, 132.8, 132.1, 129.7, 129.1, 128.6, 128.2, 128.1, 127.5, 123.5, 121.4, 61.1, 48.6, 40.9, 27.4, 21.7, 13.4. HRMS (ESI) *m/z*: (M+H)<sup>+</sup> calcd. for C<sub>30</sub>H<sub>29</sub>BrNO<sub>5</sub>S 594.0950, found: 594.0939. IR  $\nu_{\max}$ /cm<sup>-1</sup> 3062, 3025, 2981, 2928, 2871, 1719, 1595, 1490, 1446, 1351, 1160, 1091, 1009, 814, 753.

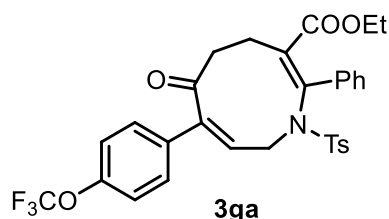

**Ethyl(2E,7Z)-6-oxo-2-phenyl-1-tosyl-7-(4-(trifluoromethoxy)phenyl)-4,5,6,9-tetrahydro-1H-azonine-3-carboxylate (3ga)**

The title compound was prepared according to the standard procedure and isolated as a white solid (56.4 mg, 94%), m.p. = 163.4-166.7 °C. <sup>1</sup>H NMR (400 MHz, CDCl<sub>3</sub>) δ 7.43 (d, *J* = 7.9 Hz, 2H), 7.40 – 7.27 (m, 5H), 7.25 – 7.14 (m, 6H), 6.09 (t, *J* = 8.2 Hz, 1H), 4.35 (dd, *J* = 13.8, 7.2 Hz, 1H), 4.03 (dd, *J* = 13.8, 9.3 Hz, 1H), 3.87 – 3.69 (m, 2H), 2.86 – 2.74 (m, 1H), 2.70 – 2.53 (m, 2H), 2.44 (s, 3H), 2.42 – 2.34 (m, 1H), 0.70 (t, *J* = 7.1 Hz, 3H). <sup>13</sup>C NMR (101 MHz, CDCl<sub>3</sub>) δ 207.8, 169.0, 149.9, 148.4, 144.2, 144.0, 138.2, 135.7, 132.8, 132.7, 129.8, 129.2, 128.7, 128.3, 128.1, 127.6, 121.8 (q, *J* = 257 Hz), 121.6, 121.4, 61.1, 48.6, 40.9, 27.5, 21.7, 13.4. <sup>19</sup>F NMR (376 MHz, CDCl<sub>3</sub>) δ -57.87. HRMS (ESI) *m/z*: (M+H)<sup>+</sup> calcd. for C<sub>31</sub>H<sub>29</sub>F<sub>3</sub>NO<sub>6</sub>S 600.1668, found: 600.1663. IR  $\nu_{\max}$ /cm<sup>-1</sup> 3065, 3030, 2982, 2929, 1703, 1598, 1352, 1255, 1211, 1160, 1091, 920, 852, 755.



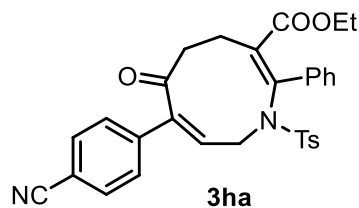

**Ethyl(2*E*,7*Z*)-7-(4-cyanophenyl)-6-oxo-2-phenyl-1-tosyl-4,5,6,9-tetrahydro-1*H*-azonine-3-carboxylate (3ha)**

The title compound was prepared according to the standard procedure and isolated as a white solid (36.8 mg, 68%), m.p. = 170.3-173.6 °C. <sup>1</sup>H NMR (400 MHz, CDCl<sub>3</sub>) δ 7.61 (d, *J* = 8.3 Hz, 2H), 7.43-7.32 (m, 5H), 7.29-7.25 (m, 2H), 7.18 (dd, *J* = 13.8, 7.8 Hz, 4H), 6.19 (t, 1H), 4.31 (dd, *J* = 14.0, 7.3 Hz, 1H), 4.04 (dd, *J* = 14.0, 9.0 Hz, 1H), 3.85-3.66 (m, 2H), 2.89-2.76 (m, 1H), 2.69 (t, *J* = 13.0 Hz, 1H), 2.61-2.52 (m, 1H), 2.42 (s, 3H), 2.40-2.32 (m, 1H), 0.70 (t, *J* = 7.1 Hz, 3H). <sup>13</sup>C NMR (101 MHz, CDCl<sub>3</sub>) δ 207.2, 168.8, 147.8, 144.3, 144.2, 138.5, 137.9, 135.5, 132.8, 132.8, 129.8, 129.3, 128.7, 128.3, 127.6, 127.2, 124.2, 118.4, 112.9, 61.2, 48.4, 41.2, 27.5, 21.7, 13.5. HRMS (ESI) *m/z*: (M+H)<sup>+</sup> calcd. for C<sub>31</sub>H<sub>29</sub>N<sub>2</sub>O<sub>5</sub>S 541.1797, found: 547.1790. IR  $\nu_{\max}/\text{cm}^{-1}$  3063, 3025, 2981, 2927, 2856, 2229, 1724, 1599, 1447, 1339, 1160, 1090, 1017, 912, 834.

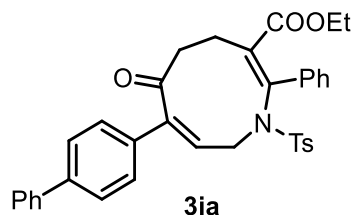

**Ethyl(2*E*,7*Z*)-7-([1,1'-biphenyl]-4-yl)-6-oxo-2-phenyl-1-tosyl-4,5,6,9-tetrahydro-1*H*-azonine-3-carboxylate (3ia)**

The title compound was prepared according to the standard procedure and isolated as a white solid (53.8 mg, 91%), m.p. = 164.9-166.2 °C. <sup>1</sup>H NMR (400 MHz, CDCl<sub>3</sub>) δ 7.62-7.49 (m, 4H), 7.48-7.38 (m, 4H), 7.38-7.29 (m, 4H), 7.27-7.24 (m, 2H), 7.24-7.15 (m, 4H), 6.14 (dd, *J* = 8.9, 7.6 Hz, 1H), 4.34 (dd, *J* = 13.8, 7.4 Hz, 1H), 4.06 (dd, *J* = 13.8, 9.2 Hz, 1H), 3.87-3.65 (m, 2H), 2.88-2.74 (m, 1H), 2.73-2.53 (m, 2H), 2.42 (s, 4H), 0.67 (t, *J* = 7.1 Hz, 3H). <sup>13</sup>C NMR (101 MHz, CDCl<sub>3</sub>, one carbon signal was overlapped) δ 208.4, 169.0, 149.3, 144.2, 144.1, 142.0, 140.2, 138.3, 135.8, 133.0, 132.8, 129.7, 129.1, 129.0, 128.7, 128.2, 127.9, 127.6, 127.1, 126.9, 120.5, 61.1, 48.8, 41.1, 27.6, 21.7, 13.4. HRMS (ESI) *m/z*: (M+H)<sup>+</sup> calcd. for C<sub>36</sub>H<sub>34</sub>NO<sub>5</sub>S 592.2158, found: 592.2160. IR  $\nu_{\max}/\text{cm}^{-1}$  3059, 3030, 2980, 2927, 1699, 1598, 1488, 1446, 1349, 1158, 1089, 1038, 909, 835.

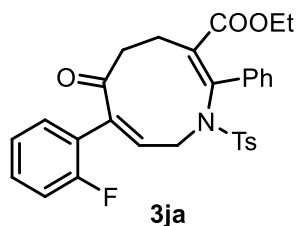

**Ethyl(2*E*,7*Z*)-7-(2-fluorophenyl)-6-oxo-2-phenyl-1-tosyl-4,5,6,9-tetrahydro-1*H*-azonine-3-carboxylate (3ja)**

The title compound was prepared according to the standard procedure and isolated as a white solid (48.0 mg, 90%), m.p. = 148.3-152.2 °C. <sup>1</sup>H NMR (400 MHz, CDCl<sub>3</sub>) δ 7.41 (d, *J* = 7.8 Hz, 2H), 7.30 (t, *J* = 7.1 Hz, 3H), 7.24-7.11 (m, 7H), 7.07-7.01 (m, 1H), 6.28 (t, *J* = 8.0 Hz, 1H), 4.27 (dd, *J* = 14.1, 7.6 Hz, 1H), 4.07 (dd, *J* = 14.1, 8.5 Hz, 1H), 3.83-3.69 (m, 2H), 2.86-2.70 (m, 2H), 2.64-2.56 (m, 1H), 2.55-2.46 (m, 1H), 2.41 (s, 3H), 0.68 (t, *J* = 7.1 Hz, 3H). <sup>13</sup>C NMR (101 MHz, CDCl<sub>3</sub>) δ 207.1, 169.1, 160.1 (d, *J* = 250.7 Hz), 144.6, 144.1, 143.9, 137.8, 135.7, 133.5, 130.9 (d, *J* = 8.5 Hz), 129.7, 129.5 (d, *J* = 3.1 Hz), 129.1, 128.8, 128.1, 127.7, 125.3 (d, *J* = 4.0 Hz), 124.8 (d, *J* = 3.5 Hz), 122.8 (d, *J* = 13.0 Hz), 116.4 (d, *J* = 22.2 Hz), 61.0, 48.4, 40.7, 27.9, 21.7, 13.4. <sup>19</sup>F NMR (376 MHz, CDCl<sub>3</sub>) δ -111.49. HRMS (ESI) *m/z*: (M+H)<sup>+</sup> calcd. for C<sub>30</sub>H<sub>29</sub>NO<sub>5</sub>FS 534.1750, found: 534.1746. IR *v*<sub>max</sub>/cm<sup>-1</sup> 3062, 3032, 2980, 2927, 1704, 1598, 1489, 1448, 1349, 1293, 1159, 1091, 1034, 1019, 913, 913, 764.

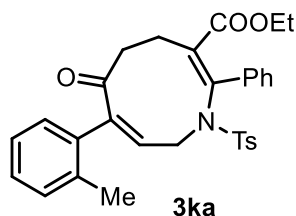

**Ethyl(2*E*,7*Z*)-7-(2-methylphenyl)-6-oxo-2-phenyl-1-tosyl-4,5,6,9-tetrahydro-1*H*-azonine-3-carboxylate (3ka)**

The title compound was prepared according to the standard procedure and isolated as a white solid (33.3 mg, 63%), m.p. = 142.3-145.1 °C. <sup>1</sup>H NMR (400 MHz, CDCl<sub>3</sub>) δ 7.31 (t, *J* = 7.5 Hz, 4H), 7.25-7.15 (m, 5H), 7.12 (t, *J* = 8.1 Hz, 4H), 6.00 (t, *J* = 8.0 Hz, 1H), 4.25 (dd, *J* = 14.3, 8.0 Hz, 1H), 4.10 (dd, *J* = 14.3, 8.1 Hz, 1H), 3.97-3.78 (m, 2H), 3.03 (t, *J* = 13.1 Hz, 1H), 2.94-2.80 (m, 1H), 2.57-2.47 (m, 1H), 2.39 (s, 3H), 2.38-2.35 (m, 1H), 2.33 (s, 3H), 0.79 (t, *J* = 7.1 Hz, 3H). <sup>13</sup>C NMR (101 MHz, CDCl<sub>3</sub>) δ 207.7, 169.0, 150.2, 145.5, 143.8, 137.8, 136.9, 135.9, 135.0, 134.0, 131.0, 129.6, 129.4, 129.0, 128.9, 128.8, 128.1, 127.7, 126.3, 125.7, 61.2, 48.7, 40.8, 28.2, 21.7, 20.6, 13.5. HRMS (ESI) *m/z*: (M+H)<sup>+</sup> calcd. for C<sub>31</sub>H<sub>32</sub>NO<sub>5</sub>S 530.2001, found: 530.1998. IR *v*<sub>max</sub>/cm<sup>-1</sup> 3060, 2980, 2926, 2871, 1698, 1597, 1445, 1348, 1291, 1202, 1090, 1033, 889, 763.

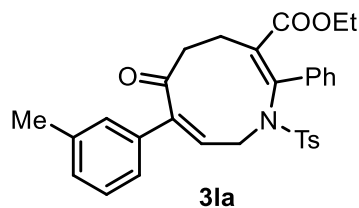

**Ethyl(2*E*,7*Z*)-6-oxo-2-phenyl-7-(*m*-tolyl)-1-tosyl-4,5,6,9-tetrahydro-1*H*-azonine-3-carboxylate (3la)**

The title compound was prepared according to the standard procedure and isolated as a white solid (50.8 mg, 96%), m.p. = 144.9-149.1 °C. <sup>1</sup>H NMR (400 MHz, CDCl<sub>3</sub>) δ 7.41 (d, *J* = 7.8 Hz, 2H), 7.32 (t, *J* = 6.8 Hz, 1H), 7.28-7.23 (m, 2H), 7.23-7.15 (m, 5H), 7.15-7.03 (m, 3H), 6.09 (t, *J* = 8.1 Hz, 1H), 4.30 (dd, *J* = 13.8, 7.4 Hz, 1H), 4.05 (dd, *J* = 13.7, 9.1 Hz, 1H), 3.85-3.65 (m, 2H), 2.84-2.73 (m, 1H), 2.67 (t, *J* = 13.7 Hz, 1H), 2.59-2.52 (m, 1H), 2.41 (s, 3H), 2.40-2.34 (m, 1H), 2.30 (s, 3H), 0.66 (t, *J* = 7.1 Hz, 3H). <sup>13</sup>C NMR (101 MHz, CDCl<sub>3</sub>) δ 208.5, 169.0, 149.7, 144.3, 144.0, 138.6, 138.3, 135.8, 133.9, 133.1, 130.0, 129.7, 129.1, 128.9, 128.7, 128.1, 127.6, 127.0, 123.7, 120.5, 61.0, 48.9, 41.1, 27.7, 21.7, 21.5, 13.3. HRMS (ESI) *m/z*: (M+H)<sup>+</sup> calcd. for C<sub>31</sub>H<sub>32</sub>NO<sub>5</sub>S 530.2001, found: 530.2000. IR  $\nu_{\max}$ /cm<sup>-1</sup> 3057, 3027, 2980, 2925, 2871, 1699, 1599, 1491, 1445, 1350, 1298, 1160, 1091, 1041, 917, 754, 682.

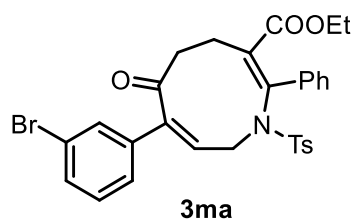

**Ethyl(2*E*,7*Z*)-7-(3-bromophenyl)-6-oxo-2-phenyl-1-tosyl-4,5,6,9-tetrahydro-1*H*-azonine-3-carboxylate (3ma)**

The title compound was prepared according to the standard procedure and isolated as a white solid (53.5 mg, 90%), m.p. = 175.1-178.6 °C. <sup>1</sup>H NMR (400 MHz, CDCl<sub>3</sub>) δ 7.46-7.31 (m, 5H), 7.27 (t, *J* = 7.5 Hz, 2H), 7.23-7.14 (m, 6H), 6.07 (t, 1H), 4.31 (dd, *J* = 13.9, 7.3 Hz, 1H), 4.02 (dd, *J* = 13.9, 9.2 Hz, 1H), 3.77 (q, *J* = 7.1 Hz, 2H), 2.85-2.74 (m, 1H), 2.67-2.51 (m, 2H), 2.41 (s, 3H), 2.41-2.33 (m, 1H), 0.68 (t, *J* = 7.1 Hz, 3H). <sup>13</sup>C NMR (101 MHz, CDCl<sub>3</sub>) δ 207.6, 169.0, 148.3, 144.2, 144.1, 138.2, 136.0, 135.7, 132.8, 132.2, 130.5, 129.8, 129.4, 129.2, 128.7, 128.2, 127.6, 125.2, 123.1, 122.1, 61.2, 48.6, 41.0, 27.5, 21.7, 13.4. HRMS (ESI) *m/z*: (M+H)<sup>+</sup> calcd. for C<sub>30</sub>H<sub>29</sub>BrNO<sub>5</sub>S 594.0950, found: 594.0942. IR  $\nu_{\max}$ /cm<sup>-1</sup> 3061, 3030, 2981, 2957, 2927, 1701, 1595, 1492, 1445, 1351, 1298, 1161, 1091, 1042, 915, 767.

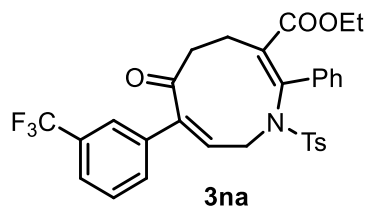

**Ethyl(2*E*,7*Z*)-6-oxo-2-phenyl-1-tosyl-7-(3-(trifluoromethyl)phenyl)-4,5,6,9-tetrahydro-1*H*-azonine-3-carboxylate (3na)**

The title compound was prepared according to the standard procedure and isolated as a white solid (43.2 mg, 74%), m.p. = 165.6-169.2 °C. <sup>1</sup>H NMR (400 MHz, CDCl<sub>3</sub>) δ 7.58 (d, *J* = 6.2 Hz, 1H), 7.53-7.40 (m, 5H), 7.35 (t, *J* = 14.5 Hz, 1H), 7.30-7.18 (m, 6H), 6.13 (t, *J* = 8.2 Hz, 1H), 4.33 (dd, *J* = 13.9, 7.3 Hz, 1H), 4.05 (dd, *J* = 13.9, 9.2 Hz, 1H), 3.85-3.71 (m, 2H), 2.86-2.74 (m, 1H), 2.64 (t, *J* = 13.7 Hz, 1H), 2.60-2.53 (m, 1H), 2.42 (s, 3H), 2.42-2.33 (m, 1H), 0.65 (t, *J* = 7.1 Hz, 3H). <sup>13</sup>C NMR (101 MHz, CDCl<sub>3</sub>) δ 207.5, 169.0, 148.3, 144.3, 144.0, 138.1, 135.6, 134.8, 132.7, 131.5 (q, *J* = 32.5 Hz), 129.8, 129.8, 129.6, 129.3, 128.6, 128.3, 127.6, 125.9 (q, *J* = 3.6 Hz), 123.8 (q, *J* = 270.9 Hz), 123.1 (q, *J* = 3.8 Hz), 122.6, 61.1, 48.5, 41.0, 27.4, 21.7, 13.3. <sup>19</sup>F NMR (376 MHz, CDCl<sub>3</sub>) δ -62.80. HRMS (ESI) *m/z*: (M+H)<sup>+</sup> calcd. for C<sub>31</sub>H<sub>29</sub>NO<sub>5</sub>F<sub>3</sub>S 584.1719, found: 584.1717. IR *v*<sub>max</sub>/cm<sup>-1</sup> 3063, 3030, 2982, 2929, 1699, 1598, 1491, 1445, 1329, 1298, 1159, 1125, 1076, 1042, 914, 803, 698.

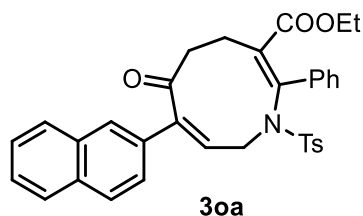

**Ethyl(2*E*,7*Z*)-7-(naphthalen-2-yl)-6-oxo-2-phenyl-1-tosyl-4,5,6,9-tetrahydro-1*H*-azonine-3-carboxylate (3oa)**

The title compound was prepared according to the standard procedure and isolated as a white solid (47.0 mg, 83%), m.p. = 166.2-169.8 °C. <sup>1</sup>H NMR (400 MHz, CDCl<sub>3</sub>) δ 7.84-7.73 (m, 3H), 7.63 (s, 1H), 7.52-7.41 (m, 5H), 7.37-7.32 (m, 1H), 7.27 (t, *J* = 14.5 Hz, 2H), 7.21 (t, *J* = 15.0 Hz, 4H), 6.24 (t, *J* = 8.1 Hz, 1H), 4.38 (dd, *J* = 13.7, 7.3 Hz, 1H), 4.10 (dd, *J* = 13.6, 9.3 Hz, 1H), 3.71 (q, *J* = 7.1 Hz, 2H), 2.86-2.76 (m, 1H), 2.75-2.57 (m, 2H), 2.48-2.43 (m, 1H), 2.42 (s, 3H), 0.63 (t, *J* = 6.8 Hz, 3H). <sup>13</sup>C NMR (101 MHz, CDCl<sub>3</sub>) δ 208.4, 169.0, 149.5, 144.2, 144.1, 138.3, 135.8, 133.4, 133.2, 133.0, 131.1, 129.7, 129.1, 128.9, 128.7, 128.4, 128.2, 127.8, 127.6, 127.0, 126.8, 126.0, 123.9, 121.0, 61.0, 48.9, 41.2, 27.7, 21.7, 13.4. HRMS (ESI) *m/z*: (M+H)<sup>+</sup> calcd. for C<sub>34</sub>H<sub>32</sub>NO<sub>5</sub>S 566.2001, found: 566.1996. IR *v*<sub>max</sub>/cm<sup>-1</sup> 3058, 3028, 2980, 2928, 1700, 1597, 1445, 1349, 1297, 1160, 1090, 1041, 913, 816, 766.

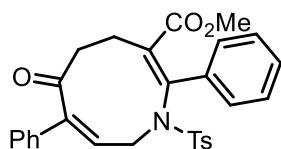

**3ab**

**Methyl(2*E*,7*Z*)-6-oxo-2,7-diphenyl-1-tosyl-4,5,6,9-tetrahydro-1*H*-azonine-3-carboxylate (3ab)**

The title compound was prepared according to the standard procedure and isolated as a white solid (42.6 mg, 85%), m.p. = 142.4-145.8 °C. <sup>1</sup>H NMR (400 MHz, CDCl<sub>3</sub>) δ 7.41 (d, *J* = 8.3 Hz, 2H), 7.35-7.29 (m, 4H), 7.28-7.22 (m, 4H), 7.18 (t, *J* = 8.6 Hz, 4H), 6.10 (t, *J* = 8.1 Hz, 1H), 4.26 (dd, *J* = 14.0, 7.5 Hz, 1H), 4.07 (dd, *J* = 14.0, 8.7 Hz, 1H), 3.29 (s, 3H), 2.85-2.71 (m, 2H), 2.60-2.52 (m, 1H), 2.41 (s, 3H), 2.41-2.32 (m, 1H). <sup>13</sup>C NMR (101 MHz, CDCl<sub>3</sub>, one carbon signal was overlapped) δ 208.4, 169.5, 149.5, 144.6, 144.1, 137.8, 135.8, 134.0, 133.0, 129.7, 129.2, 129.0, 128.5, 128.3, 127.6, 126.5, 121.0, 51.9, 48.8, 41.1, 27.8, 21.7. HRMS (ESI) *m/z*: (M + H)<sup>+</sup> calcd. for C<sub>29</sub>H<sub>28</sub>NO<sub>5</sub>S 502.1688, found: 502.1679. IR *v*<sub>max</sub>/cm<sup>-1</sup> 3060, 3027, 2951, 2926, 2854, 1715, 1597, 1494, 1446, 1302, 1158, 1090, 1041, 915, 832, 752.

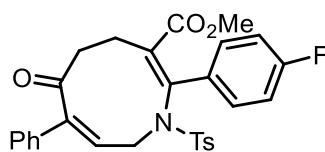

**3ac**

**Methyl(2*E*,7*Z*)-2-(4-fluorophenyl)-6-oxo-7-phenyl-1-tosyl-4,5,6,9-tetrahydro-1*H*-azonine-3-carboxylate (3ac)**

The title compound was prepared according to the standard procedure and isolated as a white solid (47.3 mg, 91%), m.p. = 139.2-140.4 °C. <sup>1</sup>H NMR (400 MHz, CDCl<sub>3</sub>) δ 7.44 (d, *J* = 8.1 Hz, 2H), 7.35 – 7.29 (m, 3H), 7.26 – 7.19 (m, 4H), 7.19 – 7.11 (m, 2H), 6.95 (t, *J* = 8.5 Hz, 2H), 6.07 (t, *J* = 8.1 Hz, 1H), 4.27 (dd, *J* = 13.9, 7.4 Hz, 1H), 4.04 (dd, *J* = 13.9, 8.9 Hz, 1H), 3.32 (s, 3H), 2.78 – 2.62 (m, 2H), 2.58 – 2.51 (m, 1H), 2.42 (s, 3H), 2.40 – 2.32 (m, 1H). <sup>13</sup>C NMR (101 MHz, CDCl<sub>3</sub>) δ 208.2, 169.3, 163.2 (d, *J* = 249.7 Hz), 149.6, 144.3, 143.5, 135.7, 134.1 (d, *J* = 3.3 Hz), 133.8, 132.8, 130.4 (d, *J* = 8.4 Hz), 129.8, 129.3, 129.0, 127.5, 126.4, 120.6, 115.3 (d, *J* = 21.8 Hz), 52.0, 48.7, 41.0, 27.7, 21.7. <sup>19</sup>F NMR (376 MHz, CDCl<sub>3</sub>) δ -111.38. HRMS (ESI) *m/z*: (M+H)<sup>+</sup> calcd. for C<sub>29</sub>H<sub>27</sub>FNO<sub>5</sub>S 520.1594, found: 520.1591. IR *v*<sub>max</sub>/cm<sup>-1</sup> 3062, 3032, 2951, 2926, 2855, 1700, 1599, 1506, 1434, 1348, 1230, 1158, 1040, 910, 813, 729.

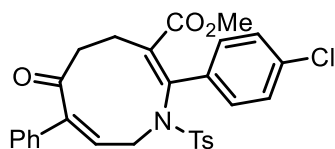

**3ad**

**Methyl(2*E*,7*Z*)-2-(4-chlorophenyl)-6-oxo-7-phenyl-1-tosyl-4,5,6,9-tetrahydro-1*H*-azonine-3-carboxylate (3ad)**

The title compound was prepared according to the standard procedure and isolated as a white solid (38.1 mg, 71%), m.p. = 128.0-135.2 °C. <sup>1</sup>H NMR (400 MHz, CDCl<sub>3</sub>) δ 7.45 (d, *J* = 8.2 Hz, 2H), 7.36-7.29 (m, 3H), 7.28-7.18 (m, 6H), 7.11 (d, *J* = 8.4 Hz, 2H), 6.06 (t, *J* = 8.1 Hz, 1H), 4.28 (dd, *J* = 13.9, 7.4 Hz, 1H), 4.04 (dd, *J* = 13.8, 9.0 Hz, 1H), 3.33 (s, 3H), 2.80-2.70 (m, 1H), 2.64 (t, *J* = 13.2 Hz, 1H), 2.59-2.51 (m, 1H), 2.44 (s, 3H), 2.36 (t, *J* = 14.6 Hz, 1H). <sup>13</sup>C NMR (101 MHz, CDCl<sub>3</sub>) δ 208.1, 169.2, 149.7, 144.4, 143.3, 136.6, 135.7, 135.3, 133.8, 133.3, 129.8, 129.8, 129.3, 129.0, 128.5, 127.5, 126.5, 120.5, 52.1, 48.9, 41.0, 27.7, 21.7. HRMS (ESI) *m/z*: (M+H)<sup>+</sup> calcd. for C<sub>29</sub>H<sub>27</sub>NO<sub>5</sub>SCl 536.1298, found: 536.1293. IR *v*<sub>max</sub>/cm<sup>-1</sup> 3062, 2952, 2924, 2853, 1725, 1595, 1490, 1436, 1300, 1161, 1088, 1040, 838, 813, 720.

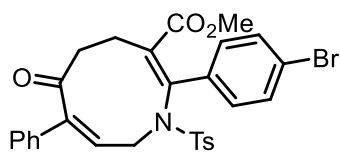

**3ae**

**Methyl(2*E*,7*Z*)-2-(4-bromophenyl)-6-oxo-7-phenyl-1-tosyl-4,5,6,9-tetrahydro-1*H*-azonine-3-carboxylate (3ae)**

The title compound was prepared according to the standard procedure and isolated as a white solid (53.4 mg, 92%), m.p. = 145.5-147.8 °C. <sup>1</sup>H NMR (400 MHz, CDCl<sub>3</sub>) δ 7.44 (d, *J* = 8.2 Hz, 2H), 7.37 (d, *J* = 8.4 Hz, 2H), 7.35-7.29 (m, 3H), 7.25-7.18 (m, 4H), 7.03 (d, *J* = 8.4 Hz, 2H), 6.07 (t, *J* = 8.2 Hz, 1H), 4.28 (dd, *J* = 13.9, 7.4 Hz, 1H), 4.04 (dd, *J* = 13.9, 9.0 Hz, 1H), 3.34 (s, 3H), 2.79-2.60 (m, 2H), 2.59-2.50 (m, 1H), 2.44 (s, 3H), 2.36 (td, *J* = 13.1, 3.3 Hz, 1H). <sup>13</sup>C NMR (101 MHz, CDCl<sub>3</sub>) δ 208.1, 169.1, 149.7, 144.4, 143.4, 137.0, 135.7, 133.8, 133.3, 131.5, 130.0, 129.8, 129.3, 129.0, 127.5, 126.5, 123.6, 120.5, 52.1, 48.9, 41.0, 27.8, 21.8. HRMS (ESI) *m/z*: (M+H)<sup>+</sup> calcd. for C<sub>29</sub>H<sub>27</sub>BrNO<sub>5</sub>S 580.0793, found: 580.0802. IR *v*<sub>max</sub>/cm<sup>-1</sup> 3059, 3029, 2950, 2925, 1713, 1596, 1487, 1434, 1351, 1296, 1160, 1090, 910, 936, 762.

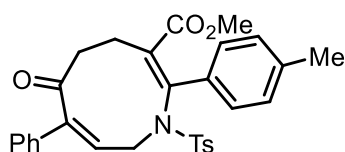

**3af**

**Methyl(2*E*,7*Z*)-6-oxo-7-phenyl-2-(*p*-tolyl)-1-tosyl-4,5,6,9-tetrahydro-1*H*-azonine-3-carboxylate (3af)**

The title compound was prepared according to the standard procedure and isolated as a white solid (40.2 mg, 78%), m.p. = 121.4-127.2 °C. <sup>1</sup>H NMR (400 MHz, CDCl<sub>3</sub>) δ 7.45 (d, *J* = 8.1 Hz, 2H), 7.35 – 7.29 (m, 3H), 7.26 – 7.18 (m, 4H), 7.06 (s, 4H), 6.07 (t, *J* = 8.1 Hz, 1H), 4.26 (dd, *J* = 13.9, 7.4 Hz, 1H), 4.05 (dd, *J* = 13.9, 8.8 Hz, 1H), 3.32 (s, 3H), 2.79 – 2.62 (m, 2H), 2.57 – 2.50 (m, 1H), 2.42 (s, 3H), 2.41 – 2.37 (m, 1H), 2.36 (s, 3H). <sup>13</sup>C NMR (101 MHz, CDCl<sub>3</sub>, one carbon stacked at aromatic chemical shift) δ 208.4, 169.7, 149.5, 144.6, 144.0, 139.3, 135.9, 135.0, 134.0, 132.1, 129.7, 129.1, 129.0, 128.4, 127.6, 126.5, 120.9, 51.9, 48.7, 41.1, 27.8, 21.7, 21.5. HRMS (ESI) *m/z*: (M+H)<sup>+</sup> calcd. for C<sub>30</sub>H<sub>30</sub>NO<sub>5</sub>S 516.1845, found: 516.1840. IR  $\nu_{\max}/\text{cm}^{-1}$  3027, 2951, 2924, 1701, 1599, 1494, 1446, 1348, 1158, 1090, 1040, 909, 815, 729.

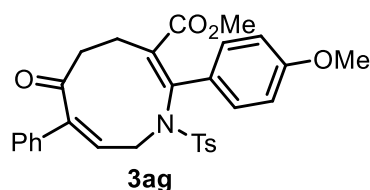

**Methyl(2*E*,7*Z*)-2-(4-methoxyphenyl)-6-oxo-7-phenyl-1-tosyl-4,5,6,9-tetrahydro-1*H*-azonine-3-carboxylate (3ag)**

The title compound was prepared according to the standard procedure and isolated as a yellow oil (41.4 mg, 78%), m.p. = 130.6-132.4 °C. <sup>1</sup>H NMR (400 MHz, CDCl<sub>3</sub>) δ 7.45 (d, *J* = 8.2 Hz, 2H), 7.34-7.29 (m, 3H), 7.25-7.19 (m, 4H), 7.09 (d, *J* = 8.7 Hz, 2H), 6.76 (d, *J* = 8.7 Hz, 2H), 6.06 (t, *J* = 8.1 Hz, 1H), 4.25 (dd, *J* = 13.9, 7.5 Hz, 1H), 4.05 (dd, *J* = 13.9, 8.8 Hz, 1H), 3.81 (s, 3H), 3.33 (s, 3H), 2.77-2.63 (m, 2H), 2.56-2.49 (m, 1H), 2.42 (s, 3H), 2.40-2.29 (m, 1H). <sup>13</sup>C NMR (101 MHz, CDCl<sub>3</sub>) δ 208.5, 169.8, 160.4, 149.4, 144.4, 144.0, 135.9, 134.0, 131.3, 130.3, 130.0, 129.7, 129.1, 129.0, 127.6, 126.4, 120.9, 113.6, 55.4, 51.9, 48.6, 41.1, 27.8, 21.7. HRMS (ESI) *m/z*: (M+H)<sup>+</sup> calcd. for C<sub>30</sub>H<sub>30</sub>NO<sub>6</sub>S 532.1794, found: 532.1793. IR  $\nu_{\max}/\text{cm}^{-1}$  3059, 3030, 3003, 2951, 2839, 1701, 1604, 1510, 1444, 1348, 1300, 1251, 1159, 1090, 1034, 912, 838.

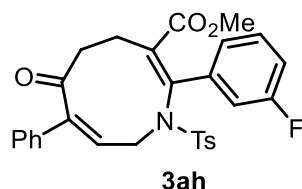

**Methyl(2*E*,7*Z*)-2-(3-fluorophenyl)-6-oxo-7-phenyl-1-tosyl-4,5,6,9-tetrahydro-1*H*-azonine-3-carboxylate (3ah)**

The title compound was prepared according to the standard procedure and isolated as a white solid (35.3 mg, 68%), m.p. = 135.7-137.8 °C. <sup>1</sup>H NMR (400 MHz, CDCl<sub>3</sub>) δ 7.45 (d, *J* = 8.1 Hz, 2H), 7.37-7.30 (m, 3H), 7.30-7.18 (m, 5H), 7.08-6.98 (m, 2H), 6.83 (d,

$J = 9.4$  Hz, 1H), 6.08 (t,  $J = 8.1$  Hz, 1H), 4.29 (dd,  $J = 13.9, 7.4$  Hz, 1H), 4.05 (dd,  $J = 13.8, 9.0$  Hz, 1H), 3.33 (s, 3H), 2.80-2.72 (m, 1H), 2.71-2.62 (m, 1H), 2.59-2.52 (m, 1H), 2.41 (s, 3H), 2.40-2.28 (m, 1H).  $^{13}\text{C}$  NMR (101 MHz,  $\text{CDCl}_3$ , one carbon signal was overlapped)  $\delta$  208.0, 169.1, 162.5 (d,  $J = 246.8$  Hz), 149.7, 144.4, 142.9 (d,  $J = 2.2$  Hz), 140.2 (d,  $J = 7.5$  Hz), 135.6, 133.8 (d,  $J = 1.5$  Hz), 129.8, 129.7, 129.3, 129.0, 127.5, 126.5, 124.5 (d,  $J = 2.8$  Hz), 120.5, 116.2 (d,  $J = 21.2$  Hz), 115.3 (d,  $J = 22.4$  Hz), 52.1, 48.8, 40.9, 27.7, 21.7.  $^{19}\text{F}$  NMR (376 MHz,  $\text{CDCl}_3$ )  $\delta$  -112.96. HRMS (ESI)  $m/z$ : (M+H)<sup>+</sup> calcd. for  $\text{C}_{29}\text{H}_{27}\text{FNO}_5\text{S}$  520.1594, found: 520.1594. IR  $\nu_{\text{max}}/\text{cm}^{-1}$  3063, 3030, 2951, 2926, 2891, 1702, 1584, 1486, 1435, 1349, 1201, 1160, 1090, 1040, 909, 789, 678.

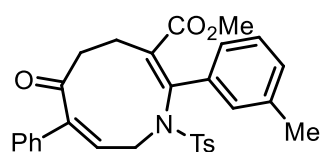

**3ai**

**Methyl(2*E*,7*Z*)-6-oxo-7-phenyl-2-(*m*-tolyl)-1-tosyl-4,5,6,9-tetrahydro-1*H*-azonine-3-carboxylate (3ai)**

The title compound was prepared according to the standard procedure and isolated as a white solid (48.0 mg, 93%), m.p. = 124.3-129.6 °C.  $^1\text{H}$  NMR (400 MHz,  $\text{CDCl}_3$ )  $\delta$  7.39 (d,  $J = 8.2$  Hz, 2H), 7.35-7.29 (m, 3H), 7.29-7.24 (m, 2H), 7.20-7.08 (m, 4H), 6.97 (d,  $J = 7.2$  Hz, 1H), 6.81 (s, 1H), 6.14 (t,  $J = 8.1$  Hz, 1H), 4.23 (d,  $J = 21.8$  Hz, 1H), 4.12 (d,  $J = 22.5$  Hz, 1H), 3.32 (s, 3H), 2.93-2.75 (m, 2H), 2.63-2.56 (m, 1H), 2.46-2.41 (m, 1H), 2.40 (s, 3H), 2.21 (s, 3H).  $^{13}\text{C}$  NMR (101 MHz,  $\text{CDCl}_3$ )  $\delta$  208.4, 169.6, 149.1, 145.0, 143.9, 137.7, 137.3, 135.9, 134.1, 132.9, 130.0, 129.5, 129.1, 129.0, 128.9, 128.1, 127.6, 126.4, 126.0, 121.4, 51.9, 48.9, 41.3, 28.0, 21.6, 21.3. HRMS (ESI)  $m/z$ : (M+H)<sup>+</sup> calcd. for  $\text{C}_{30}\text{H}_{30}\text{NO}_5\text{S}$  516.1845, found: 516.1840. IR  $\nu_{\text{max}}/\text{cm}^{-1}$  3063, 3030, 2951, 2926, 1702, 1584, 1486, 1435, 1350, 1301, 1160, 1090, 1040, 982, 833.

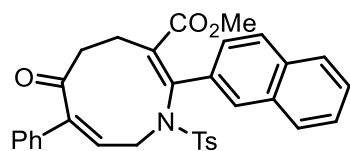

**3aj**

**Methyl(2*E*,7*Z*)-2-(naphthalen-2-yl)-6-oxo-7-phenyl-1-tosyl-4,5,6,9-tetrahydro-1*H*-azonine-3-carboxylate (3aj)**

The title compound was prepared according to the standard procedure and isolated as a white solid (49.7 mg, 90%), m.p. = 146.9-149.2 °C.  $^1\text{H}$  NMR (400 MHz,  $\text{CDCl}_3$ )  $\delta$  7.72 (d,  $J = 7.8$  Hz, 1H), 7.63-7.56 (m, 2H), 7.46-7.39 (m, 3H), 7.30-7.16 (m, 9H), 6.90 (d,  $J = 8.0$  Hz, 2H), 6.10 (t,  $J = 8.1$  Hz, 1H), 4.26 (dd,  $J = 14.0, 7.6$  Hz, 1H), 4.11 (dd,  $J =$



13.9, 8.7 Hz, 1H), 3.16 (s, 3H), 2.87-2.74 (m, 2H), 2.58-2.49 (m, 1H), 2.36-2.32 (m, 1H), 2.20 (s, 3H). <sup>13</sup>C NMR (101 MHz, CDCl<sub>3</sub>) δ 208.4, 169.5, 149.4, 144.9, 144.0, 135.9, 134.8, 134.0, 133.4, 133.2, 132.9, 129.5, 129.2, 129.0, 128.5, 128.3, 127.8, 127.7, 127.4, 126.9, 126.4, 126.4, 126.0, 121.2, 51.9, 49.1, 41.2, 28.1, 21.5. HRMS (ESI) m/z: (M+H)<sup>+</sup> calcd. for C<sub>33</sub>H<sub>30</sub>NO<sub>5</sub>S 552.1845, found: 552.1844. IR ν<sub>max</sub>/cm<sup>-1</sup> 3059, 2951, 2925, 1718, 1678, 1597, 1495, 1434, 1348, 1324, 1155, 1088, 731.

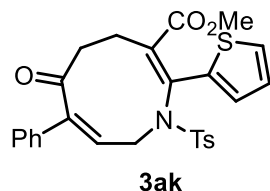

**Methyl(2*E*,7*Z*)-6-oxo-7-phenyl-2-(thiophen-2-yl)-1-tosyl-4,5,6,9-tetrahydro-1*H*-azonine-3-carboxylate (3ak)**

The title compound was prepared according to the standard procedure and isolated as a white solid (36.0 mg, 71%), m.p. = 151.1-153.8 °C. <sup>1</sup>H NMR (400 MHz, CDCl<sub>3</sub>) δ 7.58 (d, *J* = 8.3 Hz, 2H), 7.35-7.30 (m, 4H), 7.29-7.22 (m, 4H), 7.01-6.96 (m, 1H), 6.96-6.90 (m, 1H), 6.04 (dd, *J* = 8.2, 7.4 Hz, 1H), 4.17 (dd, *J* = 13.8, 7.1 Hz, 1H), 4.01 (dd, *J* = 13.8, 8.5 Hz, 1H), 3.42 (s, 3H), 2.77-2.66 (m, 1H), 2.64-2.51 (m, 2H), 2.50-2.44 (m, 1H), 2.44 (s, 3H). <sup>13</sup>C NMR (101 MHz, CDCl<sub>3</sub>) δ 208.2, 169.4, 149.9, 144.3, 140.4, 135.9, 135.6, 134.1, 134.1, 129.8, 129.2, 129.0, 128.9, 128.2, 127.7, 127.1, 126.5, 120.8, 52.2, 47.7, 40.8, 27.7, 21.8. HRMS (ESI) m/z: (M+H)<sup>+</sup> calcd. for C<sub>27</sub>H<sub>26</sub>NO<sub>5</sub>S<sub>2</sub> 508.1252, found: 508.1247. IR ν<sub>max</sub>/cm<sup>-1</sup> 3062, 3028, 2950, 2926, 1716, 1700, 1597, 1494, 1433, 1352, 1293, 1161, 1091, 1039, 911, 939.

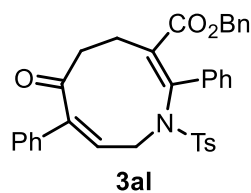

**Benzyl(2*E*,7*Z*)-6-oxo-2,7-diphenyl-1-tosyl-4,5,6,9-tetrahydro-1*H*-azonine-3-carboxylate (3al)**

The title compound was prepared according to the standard procedure and isolated as a white solid (48.5 mg, 84%), m.p. = 160.4-162.3 °C. <sup>1</sup>H NMR (400 MHz, CDCl<sub>3</sub>) δ 7.43 (d, *J* = 8.1 Hz, 2H), 7.33-7.30 (m, 1H), 7.27-7.10 (m, 12H), 7.09-7.00 (m, 2H), 6.63 (d, *J* = 7.3 Hz, 2H), 5.97 (dd, *J* = 9.4, 7.2 Hz, 1H), 4.71 (q, *J* = 12.3 Hz, 2H), 4.36 (dd, *J* = 13.6, 7.0 Hz, 1H), 3.98 (dd, *J* = 13.5, 9.7 Hz, 1H), 2.85-2.72 (m, 1H), 2.57-2.47 (m, 2H), 2.41 (s, 3H), 2.38-2.28 (m, 1H). <sup>13</sup>C NMR (101 MHz, CDCl<sub>3</sub>) δ 208.0, 168.9, 150.1, 144.1, 143.9, 138.4, 135.7, 134.8, 133.6, 132.2, 129.7, 129.2, 129.0, 128.8, 128.7, 128.3, 128.3, 128.2, 128.1, 127.5, 126.5, 120.0, 67.2, 48.6, 40.6, 27.5, 21.7. HRMS (ESI) m/z: (M+H)<sup>+</sup> calcd. for C<sub>35</sub>H<sub>32</sub>NO<sub>5</sub>S 578.2001, found: 578.1997. IR ν<sub>max</sub>/cm<sup>-1</sup>

3061, 3031, 2954, 2925, 2887, 1698, 1597, 1494, 1446, 1348, 1294, 1237, 1157, 1089, 1041, 912, 813.

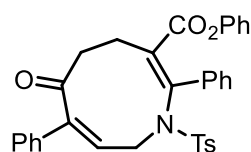

**3am**

**Phenyl(2E,7Z)-6-oxo-2,7-diphenyl-1-tosyl-4,5,6,9-tetrahydro-1H-azonine-3-carboxylate (3am)**

The title compound was prepared according to the standard procedure and isolated as a white solid (50.7 mg, 90%), m.p. = 173.4-177.3 °C. <sup>1</sup>H NMR (400 MHz, CDCl<sub>3</sub>) δ 7.44 (d, *J* = 8.2 Hz, 2H), 7.40-7.37 (m, 1H), 7.35-7.32 (m, 3H), 7.32-7.24 (m, 6H), 7.22 (d, *J* = 8.1 Hz, 2H), 7.14 (t, *J* = 8.0 Hz, 2H), 7.12-7.04 (m, 1H), 6.34 (d, *J* = 7.8 Hz, 2H), 6.13 (t, 1H), 4.40 (dd, *J* = 13.8, 7.1 Hz, 1H), 4.09 (dd, *J* = 13.7, 9.4 Hz, 1H), 2.95-2.85 (m, 1H), 2.81-2.68 (m, 1H), 2.66-2.60 (m, 1H), 2.57-2.49 (m, 1H), 2.44 (s, 3H). <sup>13</sup>C NMR (101 MHz, CDCl<sub>3</sub>) δ 208.2, 167.7, 150.2, 149.9, 145.4, 144.3, 138.2, 135.7, 133.6, 131.8, 129.8, 129.7, 129.3, 129.2, 129.1, 129.1, 128.6, 127.6, 126.5, 126.0, 121.0, 120.1, 48.9, 40.9, 28.0, 21.8. HRMS (ESI) *m/z*: (M+H)<sup>+</sup> calcd. for C<sub>34</sub>H<sub>30</sub>NO<sub>5</sub>S 564.1845, found: 564.1852. IR  $\nu_{\max}$ /cm<sup>-1</sup> 3060, 3030, 2957, 2922, 1727, 1698, 1595, 1492, 1446, 1351, 1161, 1091, 1040, 913.

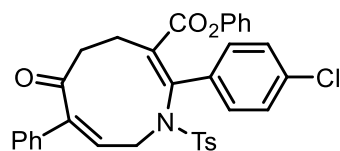

**3an**

**Phenyl(2E,7Z)-7-(4-chlorophenyl)-6-oxo-2-phenyl-1-tosyl-4,5,6,9-tetrahydro-1H-azonine-3-carboxylate (3an)**

The title compound was prepared according to the standard procedure and isolated as a white solid (34.7 mg, 58%), m.p. = 170.9-173.8 °C. <sup>1</sup>H NMR (400 MHz, CDCl<sub>3</sub>) δ 7.48 (d, *J* = 8.1 Hz, 2H), 7.31-7.23 (m, 11H), 7.19 (t, *J* = 7.7 Hz, 2H), 7.11 (t, *J* = 7.2 Hz, 1H), 6.38 (d, *J* = 8.0 Hz, 2H), 6.10 (dd, *J* = 9.2, 7.4 Hz, 1H), 4.42 (dd, *J* = 13.7, 7.1 Hz, 1H), 4.06 (dd, *J* = 13.7, 9.6 Hz, 1H), 2.93-2.81 (m, 1H), 2.70-2.57 (m, 2H), 2.57-2.48 (m, 1H), 2.45 (s, 3H). <sup>13</sup>C NMR (101 MHz, CDCl<sub>3</sub>, one carbon signal was overlapped) δ 207.9, 167.3, 150.1, 144.6, 144.2, 136.9, 135.8, 135.7, 133.5, 132.1, 130.3, 129.9, 129.4, 129.4, 129.2, 128.8, 127.5, 126.4, 126.1, 120.8, 119.7, 49.0, 40.8, 27.9, 21.8. HRMS (ESI) *m/z*: (M+H)<sup>+</sup> calcd. for C<sub>34</sub>H<sub>29</sub>NO<sub>5</sub>SCl 598.1455, found: 598.1452. IR  $\nu_{\max}$ /cm<sup>-1</sup> 3062, 3031, 2956, 2925, 2855, 1726, 1698, 1593, 1490, 1446, 1351, 1294, 1160, 1090, 1040, 910, 815.

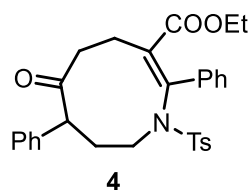

**Ethyl(*E*)-6-oxo-2,7-diphenyl-1-tosyl-4,5,6,7,8,9-hexahydro-1*H*-azonine-3-carboxylate (4)**

The title compound was isolated as a white solid (22.3 mg, 43%), m.p. = 155.1-159.8 °C. <sup>1</sup>H NMR (400 MHz, CDCl<sub>3</sub>) δ 7.43 (d, *J* = 8.0 Hz, 2H), 7.37-7.28 (m, 5H), 7.24-7.20 (m, 1H), 7.18-7.10 (m, 4H), 7.00 (d, *J* = 7.6 Hz, 2H), 4.76 (dd, *J* = 11.0, 4.6 Hz, 1H), 3.99-3.82 (m, 3H), 3.53-3.41 (m, 1H), 3.35-3.22 (m, 1H), 2.92 (dt, *J* = 14.0, 4.2 Hz, 1H), 2.77 (dt, 1H), 2.51-2.40 (m, 2H), 2.39 (s, 3H), 2.35-2.28 (m, 1H), 0.76 (t, *J* = 7.1 Hz, 3H). <sup>13</sup>C NMR (101 MHz, CDCl<sub>3</sub>) δ 213.1, 169.0, 147.3, 144.0, 138.1, 136.7, 136.4, 135.3, 129.5, 129.1, 129.0, 128.9, 128.5, 128.2, 128.1, 127.6, 61.0, 51.2, 49.3, 42.1, 34.8, 28.3, 21.7, 13.4. HRMS (ESI) *m/z*: (M+H)<sup>+</sup> calcd. for C<sub>30</sub>H<sub>32</sub>NO<sub>5</sub>S 518.2001, found: 518.2003. IR  $\nu_{\max}/\text{cm}^{-1}$  3060, 3028, 2979, 2923, 2853, 1705, 1597, 1493, 1446, 1345, 1286, 1159, 1088, 1022, 904, 698, 682.

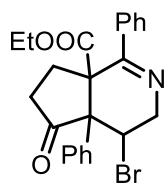

The title compound was isolated as a brown oil (25.5 mg, 0.1 mmol, 58%). <sup>1</sup>H NMR (400 MHz, CDCl<sub>3</sub>) δ 7.47 – 7.42 (m, 2H), 7.41 – 7.32 (m, 6H), 7.06 (s, 2H), 5.28 (dd, *J* = 10.8, 5.4 Hz, 1H), 4.71 (dd, *J* = 19.1, 5.4 Hz, 1H), 4.24 – 4.04 (m, 3H), 2.63 – 2.46 (m, 2H), 2.35 – 2.25 (m, 1H), 2.22 – 2.15 (m, 1H), 1.17 (t, *J* = 7.0 Hz, 3H). <sup>13</sup>C NMR (101 MHz, CDCl<sub>3</sub>) δ 214.8, 169.6, 164.8, 137.8, 136.1, 130.0, 128.76, 128.65, 128.60, 127.5, 127.1, 65.1, 62.6, 61.0, 55.8, 45.6, 37.2, 26.3, 13.9. HRMS (ESI+, MeOH) *m/z*: (M + H)<sup>+</sup> calcd. for C<sub>23</sub>H<sub>23</sub>NO<sub>3</sub>Br 440.0861, found: 440.0865. IR  $\nu_{\max}/\text{cm}^{-1}$  3060, 2979, 2929, 2856, 1747, 1737, 1715, 1636, 1496, 1444, 1260, 1001, 744, 697.

## X-ray molecular structure of 3aa

### X-ray molecular structure of 3aa

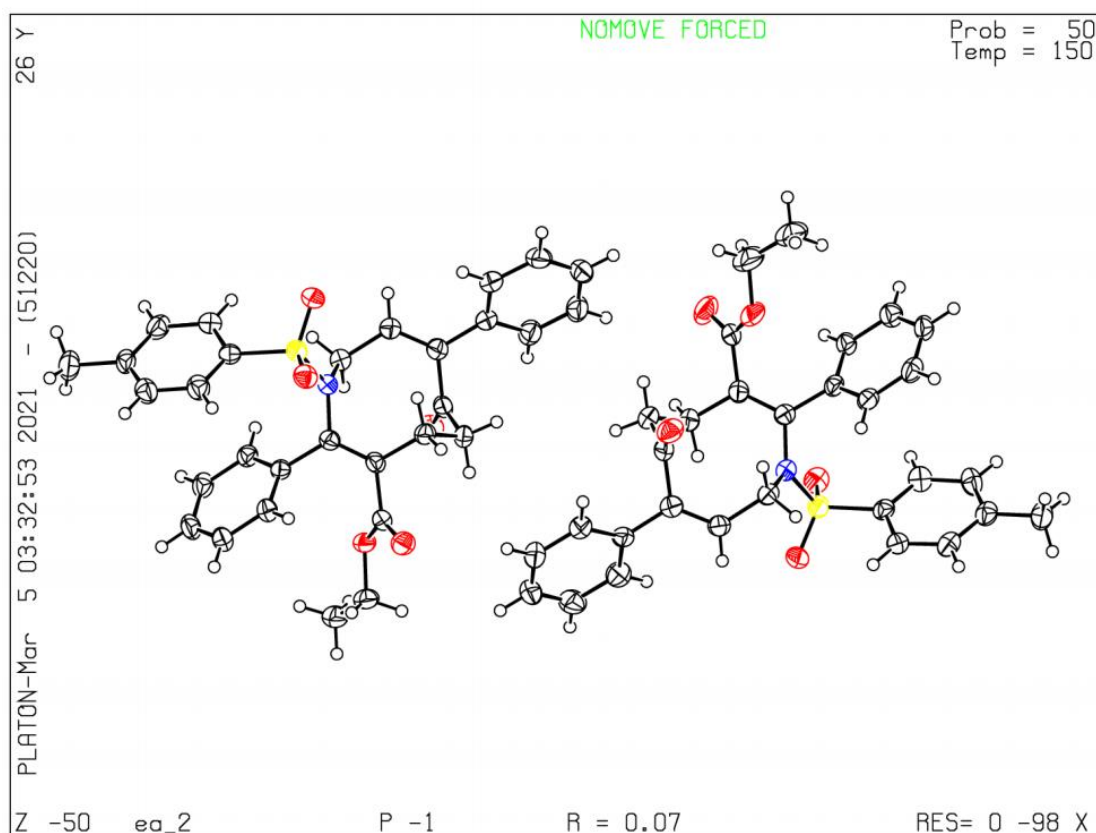

**Table 1 Crystal data and structure refinement for 3aa**

|                     |                                                   |
|---------------------|---------------------------------------------------|
| Identification code | 3aa                                               |
| Empirical formula   | C <sub>30</sub> H <sub>29</sub> NO <sub>5</sub> S |
| Formula weight      | 515.60                                            |
| Temperature/K       | 149.99(10)                                        |
| Crystal system      | triclinic                                         |
| Space group         | P-1                                               |
| a/Å                 | 9.2628(8)                                         |
| b/Å                 | 14.1029(13)                                       |
| c/Å                 | 21.1489(16)                                       |

|                                               |                                                                |
|-----------------------------------------------|----------------------------------------------------------------|
| $\alpha/^\circ$                               | 99.246(7)                                                      |
| $\beta/^\circ$                                | 100.027(7)                                                     |
| $\gamma/^\circ$                               | 102.719(8)                                                     |
| Volume/ $\text{\AA}^3$                        | 2596.2(4)                                                      |
| Z                                             | 4                                                              |
| $\rho_{\text{calc}}/\text{g/cm}^3$            | 1.319                                                          |
| $\mu/\text{mm}^{-1}$                          | 1.445                                                          |
| F(000)                                        | 1088.0                                                         |
| Crystal size/ $\text{mm}^3$                   | $0.14 \times 0.13 \times 0.11$                                 |
| Radiation                                     | Cu K $\alpha$ ( $\lambda = 1.54184$ )                          |
| $2\theta$ range for data collection/          | 4.336 to 149.022                                               |
| Index ranges                                  | $-11 \leq h \leq 7, -17 \leq k \leq 17, -25 \leq l \leq 26$    |
| Reflections collected                         | 17164                                                          |
| Independent reflections                       | 10161 [ $R_{\text{int}} = 0.0435, R_{\text{sigma}} = 0.0669$ ] |
| Data/restraints/parameters                    | 10161/16/671                                                   |
| Goodness-of-fit on $F^2$                      | 1.067                                                          |
| Final R indexes [ $I \geq 2\sigma(I)$ ]       | $R_1 = 0.0703, wR_2 = 0.1625$                                  |
| Final R indexes [all data]                    | $R_1 = 0.1098, wR_2 = 0.1842$                                  |
| Largest diff. peak/hole / $e \text{\AA}^{-3}$ | 0.69/-0.62                                                     |

### Crystal structure determination of 3aa

**Crystal Data** for  $\text{C}_{30}\text{H}_{29}\text{NO}_5\text{S}$  ( $M = 515.60$  g/mol): triclinic, space group P-1 (no. 2),  $a = 9.2628(8)$   $\text{\AA}$ ,  $b = 14.1029(13)$   $\text{\AA}$ ,  $c = 21.1489(16)$   $\text{\AA}$ ,  $\alpha = 99.246(7)$ ,  $\beta = 100.027(7)$ ,  $\gamma = 102.719(8)$ ,  $V = 2596.2(4)$   $\text{\AA}^3$ ,  $Z = 4$ ,  $T = 149.99(10)$  K,  $\mu(\text{Cu K}\alpha) = 1.445$   $\text{mm}^{-1}$ ,  $D_{\text{calc}} = 1.319$   $\text{g/cm}^3$ , 17164 reflections measured ( $4.336^\circ \leq 2\theta \leq 149.022^\circ$ ),

10161 unique ( $R_{\text{int}} = 0.0435$ ,  $R_{\text{sigma}} = 0.0669$ ) which were used in all calculations. The final  $R_1$  was 0.0703 ( $I > 2\sigma(I)$ ) and  $wR_2$  was 0.1842 (all data).

**Table 2 Fractional Atomic Coordinates ( $\times 10^4$ ) and Equivalent Isotropic Displacement Parameters ( $\text{\AA}^2 \times 10^3$ ) for 3aa.  $U_{\text{eq}}$  is defined as 1/3 of the trace of the orthogonalised  $U_{ij}$  tensor.**

| Atom | $x$        | $y$       | $z$        | $U(\text{eq})$ |
|------|------------|-----------|------------|----------------|
| S1   | 2258.7(10) | 7575.7(7) | -576.8(4)  | 30.7(2)        |
| O1   | 3124(3)    | 6910(2)   | -794.9(13) | 36.6(6)        |
| O2   | 2925(3)    | 8620(2)   | -367.3(14) | 37.5(6)        |
| O3   | -37(3)     | 8349(2)   | 1662.1(13) | 34.8(6)        |
| O4   | 2056(3)    | 9617(2)   | 1938.4(14) | 40.5(7)        |
| O5   | 1458(3)    | 5925(2)   | 1580.6(15) | 44.4(7)        |
| N1   | 1704(3)    | 7200(2)   | 59.6(14)   | 29.1(6)        |
| C31  | 4915(4)    | 5742(3)   | 1248.9(18) | 33.0(8)        |
| C32  | 5128(5)    | 5383(3)   | 1828(2)    | 41.2(9)        |
| C33  | 6535(5)    | 5277(3)   | 2109(2)    | 46.5(11)       |
| C34  | 7748(5)    | 5515(3)   | 1815(2)    | 48.2(11)       |
| C35  | 7548(5)    | 5854(4)   | 1238(2)    | 46.7(11)       |
| C36  | 6137(5)    | 5963(3)   | 953(2)     | 39.2(9)        |
| C37  | 3419(4)    | 5919(3)   | 983.8(19)  | 32.7(8)        |
| C38  | 2854(4)    | 5835(3)   | 342.9(19)  | 33.4(8)        |
| C39  | 1425(4)    | 6134(3)   | 80.0(19)   | 31.8(8)        |
| C40  | 2653(4)    | 6360(3)   | 1488.9(18) | 33.4(8)        |
| C41  | 3469(4)    | 7404(3)   | 1849.9(18) | 35.1(9)        |

**Table 2 Fractional Atomic Coordinates ( $\times 10^4$ ) and Equivalent Isotropic Displacement Parameters ( $\text{\AA}^2 \times 10^3$ ) for 3aa.  $U_{\text{eq}}$  is defined as 1/3 of the trace of the orthogonalised  $U_{ij}$  tensor.**

| Atom | <i>x</i>   | <i>y</i>  | <i>z</i>    | $U_{\text{eq}}$ |
|------|------------|-----------|-------------|-----------------|
| C42  | 3501(4)    | 8129(3)   | 1371.9(18)  | 33.2(8)         |
| C43  | 1930(4)    | 8225(3)   | 1105.4(18)  | 28.5(7)         |
| C44  | 1113(4)    | 7836(3)   | 491.0(18)   | 28.8(7)         |
| C45  | 1335(4)    | 8815(3)   | 1606.1(18)  | 30.0(8)         |
| C46  | -723(5)    | 8919(3)   | 2105(2)     | 41.4(10)        |
| C47  | -2354(5)   | 8361(3)   | 1994(2)     | 45.5(10)        |
| C48  | -387(4)    | 8015(3)   | 231.1(17)   | 28.6(7)         |
| C49  | -1577(4)   | 7217(3)   | -143.2(18)  | 32.1(8)         |
| C50  | -2997(4)   | 7377(3)   | -358.8(19)  | 38.2(9)         |
| C51  | -3244(4)   | 8307(3)   | -214(2)     | 39.8(9)         |
| C52  | -2052(4)   | 9107(3)   | 135(2)      | 39.1(9)         |
| C53  | -632(4)    | 8949(3)   | 352.5(19)   | 34.0(8)         |
| C54  | 639(4)     | 7403(3)   | -1203.0(18) | 30.8(8)         |
| C55  | -32(4)     | 6454(3)   | -1574.9(19) | 36.8(9)         |
| C56  | -1339(5)   | 6303(3)   | -2049(2)    | 41.5(10)        |
| C57  | -1980(4)   | 7084(3)   | -2157.8(18) | 36.4(9)         |
| C58  | -1276(4)   | 8023(3)   | -1791(2)    | 40.5(9)         |
| C59  | 30(4)      | 8179(3)   | -1310(2)    | 39.6(9)         |
| C60  | -3425(5)   | 6896(4)   | -2675(2)    | 52.7(12)        |
| S2   | 9016.1(10) | 7379.5(7) | 6020.7(5)   | 33.1(2)         |

**Table 2 Fractional Atomic Coordinates ( $\times 10^4$ ) and Equivalent Isotropic Displacement Parameters ( $\text{\AA}^2 \times 10^3$ ) for 3aa.  $U_{\text{eq}}$  is defined as 1/3 of the trace of the orthogonalised  $U_{ij}$  tensor.**

| Atom | <i>x</i> | <i>y</i> | <i>z</i>   | $U_{\text{eq}}$ |
|------|----------|----------|------------|-----------------|
| O6   | 9240(4)  | 5397(2)  | 3408.1(15) | 60.6(10)        |
| O7   | 11375(4) | 6613(3)  | 3798.2(15) | 62.9(10)        |
| O8   | 9456(3)  | 8984(2)  | 3733.1(14) | 45.2(7)         |
| O9   | 8480(3)  | 6323(2)  | 5877.2(14) | 42.0(7)         |
| O10  | 8048(3)  | 8002(2)  | 6182.2(14) | 39.1(6)         |
| N2   | 9525(3)  | 7683(2)  | 5357.9(15) | 31.8(7)         |
| C1   | 6122(4)  | 9089(3)  | 4149.5(18) | 32.5(8)         |
| C2   | 5926(5)  | 9509(3)  | 3600(2)    | 38.7(9)         |
| C3   | 4549(5)  | 9703(3)  | 3357(2)    | 47.0(11)        |
| C4   | 3347(5)  | 9458(4)  | 3654(2)    | 49.3(11)        |
| C5   | 3522(5)  | 9034(4)  | 4196(2)    | 51.2(12)        |
| C6   | 4908(5)  | 8852(3)  | 4444(2)    | 45.1(10)        |
| C7   | 8224(4)  | 8978(3)  | 5031.6(19) | 35.2(8)         |
| C8   | 7618(4)  | 8895(3)  | 4397.0(19) | 32.4(8)         |
| C9   | 8367(4)  | 8486(3)  | 3875.8(18) | 34.1(8)         |
| C10  | 7669(5)  | 7410(3)  | 3551.1(19) | 37.4(9)         |
| C11  | 7734(4)  | 6729(3)  | 4047.7(19) | 35.5(9)         |
| C12  | 9701(4)  | 8730(3)  | 5283.7(18) | 33.6(8)         |
| C13  | 9333(4)  | 6663(3)  | 4309.6(19) | 32.8(8)         |
| C14  | 10118(4) | 7030(3)  | 4932.1(18) | 30.2(8)         |



**Table 2 Fractional Atomic Coordinates ( $\times 10^4$ ) and Equivalent Isotropic Displacement Parameters ( $\text{\AA}^2 \times 10^3$ ) for 3aa.  $U_{\text{eq}}$  is defined as 1/3 of the trace of the orthogonalised  $U_{ij}$  tensor.**

| Atom | <i>x</i> | <i>y</i> | <i>z</i>   | $U_{\text{eq}}$ |
|------|----------|----------|------------|-----------------|
| C15  | 11599(4) | 6841(3)  | 5202.2(17) | 30.5(8)         |
| C16  | 11844(4) | 5904(3)  | 5061.7(18) | 33.2(8)         |
| C17  | 13251(4) | 5734(3)  | 5283(2)    | 39.7(9)         |
| C18  | 14441(4) | 6522(3)  | 5648.5(19) | 39.8(9)         |
| C19  | 14197(4) | 7458(3)  | 5798.2(19) | 38.5(9)         |
| C20  | 12793(4) | 7626(3)  | 5586.7(18) | 34.1(8)         |
| C21  | 10626(4) | 7713(3)  | 6672.1(18) | 31.1(8)         |
| C22  | 11337(4) | 7004(3)  | 6847(2)    | 39.1(9)         |
| C23  | 12610(4) | 7283(3)  | 7360(2)    | 41.6(10)        |
| C24  | 13191(4) | 8258(3)  | 7688.9(19) | 37.2(9)         |
| C25  | 12431(5) | 8949(3)  | 7505.6(19) | 41.0(9)         |
| C26  | 11150(4) | 8699(3)  | 7004.8(19) | 35.7(9)         |
| C27  | 14584(5) | 8565(4)  | 8236(2)    | 47.6(11)        |
| C28  | 9970(5)  | 6143(3)  | 3801(2)    | 40.7(10)        |
| C29  | 12042(7) | 6102(8)  | 3334(3)    | 128(3)          |
| C30  | 13568(7) | 6168(7)  | 3551(3)    | 128(3)          |

**Table 3 Anisotropic Displacement Parameters ( $\text{\AA}^2 \times 10^3$ ) for 3aa. The Anisotropic displacement factor exponent takes the form:  $-2\pi^2[h^2a^*^2U_{11}+2hka^*b^*U_{12}+\dots]$ .**

| Atom | U <sub>11</sub> | U <sub>22</sub> | U <sub>33</sub> | U <sub>23</sub> | U <sub>13</sub> | U <sub>12</sub> |
|------|-----------------|-----------------|-----------------|-----------------|-----------------|-----------------|
| S1   | 24.6(4)         | 36.5(5)         | 31.0(5)         | 6.6(4)          | 7.2(3)          | 7.4(4)          |
| O1   | 30.9(13)        | 43.2(16)        | 38.1(15)        | 5.9(12)         | 10.5(11)        | 14.1(12)        |
| O2   | 29.8(13)        | 39.0(15)        | 42.2(16)        | 7.1(12)         | 8.6(12)         | 6.1(11)         |
| O3   | 30.9(13)        | 41.3(15)        | 31.9(14)        | 1.4(11)         | 9.3(11)         | 11.2(11)        |
| O4   | 35.9(14)        | 37.6(16)        | 40.8(16)        | -3.4(12)        | 3.0(12)         | 7.2(12)         |
| O5   | 39.2(15)        | 52.8(19)        | 45.3(17)        | 14.2(14)        | 16.8(13)        | 11.4(13)        |
| N1   | 27.5(15)        | 32.5(17)        | 27.9(15)        | 5.1(12)         | 5.1(12)         | 10.7(12)        |
| C31  | 36.4(19)        | 35(2)           | 28.4(19)        | 3.4(15)         | 7.0(15)         | 12.4(16)        |
| C32  | 45(2)           | 44(2)           | 35(2)           | 9.3(18)         | 6.5(18)         | 11.7(19)        |
| C33  | 58(3)           | 45(3)           | 36(2)           | 6.4(19)         | -2(2)           | 22(2)           |
| C34  | 45(2)           | 51(3)           | 46(3)           | -4(2)           | -2(2)           | 25(2)           |
| C35  | 38(2)           | 58(3)           | 44(2)           | -2(2)           | 12.2(19)        | 18(2)           |
| C36  | 40(2)           | 48(2)           | 31(2)           | 3.0(17)         | 9.4(17)         | 15.7(18)        |
| C37  | 32.4(19)        | 36(2)           | 32.1(19)        | 7.9(16)         | 8.0(15)         | 11.0(16)        |
| C38  | 36.1(19)        | 34(2)           | 31.0(19)        | 5.3(15)         | 6.6(15)         | 12.6(16)        |
| C39  | 31.6(18)        | 34(2)           | 30.9(19)        | 6.3(15)         | 5.8(15)         | 10.2(15)        |
| C40  | 29.7(18)        | 45(2)           | 30.4(19)        | 13.7(17)        | 6.7(15)         | 16.0(17)        |
| C41  | 30.4(18)        | 48(2)           | 26.7(18)        | 6.4(16)         | 3.2(15)         | 13.3(17)        |
| C42  | 27.1(18)        | 37(2)           | 30.7(19)        | -0.8(16)        | 3.8(15)         | 5.8(15)         |
| C43  | 23.3(16)        | 30.2(19)        | 31.3(18)        | 5.3(15)         | 4.0(14)         | 7.6(14)         |
| C44  | 27.6(17)        | 29.5(19)        | 30.6(19)        | 7.2(15)         | 8.1(14)         | 8.3(14)         |

**Table 3 Anisotropic Displacement Parameters ( $\text{\AA}^2 \times 10^3$ ) for 3aa. The Anisotropic displacement factor exponent takes the form:  $-2\pi^2[h^2a^*^2U_{11}+2hka^*b^*U_{12}+\dots]$ .**

| Atom | U <sub>11</sub> | U <sub>22</sub> | U <sub>33</sub> | U <sub>23</sub> | U <sub>13</sub> | U <sub>12</sub> |
|------|-----------------|-----------------|-----------------|-----------------|-----------------|-----------------|
| C45  | 28.0(17)        | 34(2)           | 29.9(18)        | 7.6(15)         | 5.2(14)         | 11.8(15)        |
| C46  | 39(2)           | 50(3)           | 36(2)           | 0.2(18)         | 13.9(17)        | 14.9(19)        |
| C47  | 40(2)           | 55(3)           | 42(2)           | 4(2)            | 14.8(19)        | 16(2)           |
| C48  | 25.8(17)        | 35(2)           | 25.9(18)        | 6.5(15)         | 7.2(14)         | 8.0(15)         |
| C49  | 31.0(18)        | 38(2)           | 28.0(18)        | 7.6(15)         | 7.0(15)         | 8.5(16)         |
| C50  | 28.4(18)        | 51(3)           | 32(2)           | 10.8(18)        | 4.9(16)         | 5.3(17)         |
| C51  | 26.0(18)        | 57(3)           | 39(2)           | 15.4(19)        | 4.4(16)         | 13.8(18)        |
| C52  | 36(2)           | 47(2)           | 38(2)           | 12.7(18)        | 5.0(17)         | 17.4(18)        |
| C53  | 28.6(18)        | 38(2)           | 34(2)           | 6.7(16)         | 2.9(15)         | 8.5(16)         |
| C54  | 28.7(18)        | 37(2)           | 29.8(19)        | 7.9(15)         | 11.0(15)        | 9.2(15)         |
| C55  | 38(2)           | 39(2)           | 35(2)           | 4.9(17)         | 9.3(17)         | 14.5(17)        |
| C56  | 38(2)           | 47(2)           | 32(2)           | -0.4(18)        | 3.9(17)         | 4.2(18)         |
| C57  | 31.0(19)        | 56(3)           | 26.2(19)        | 15.9(18)        | 7.3(15)         | 12.5(18)        |
| C58  | 36(2)           | 50(3)           | 41(2)           | 18.6(19)        | 10.1(17)        | 14.8(19)        |
| C59  | 35(2)           | 47(2)           | 39(2)           | 13.1(18)        | 8.3(17)         | 10.6(18)        |
| C60  | 41(2)           | 77(4)           | 37(2)           | 15(2)           | -0.1(19)        | 14(2)           |
| S2   | 27.8(4)         | 40.4(5)         | 30.0(5)         | 6.6(4)          | 6.7(4)          | 6.3(4)          |
| O6   | 94(3)           | 47.3(19)        | 33.7(17)        | -6.0(14)        | -9.3(17)        | 32.3(18)        |
| O7   | 52.9(19)        | 114(3)          | 26.3(15)        | 3.7(17)         | 12.1(14)        | 35(2)           |
| O8   | 43.6(16)        | 54.6(19)        | 36.5(16)        | 6.4(13)         | 15.0(13)        | 7.9(14)         |
| O9   | 37.7(15)        | 43.4(17)        | 40.8(16)        | 7.7(13)         | 8.9(12)         | 2.1(12)         |

**Table 3 Anisotropic Displacement Parameters ( $\text{\AA}^2 \times 10^3$ ) for 3aa. The Anisotropic displacement factor exponent takes the form:  $-2\pi^2[h^2a^*U_{11}+2hka^*b^*U_{12}+\dots]$ .**

| Atom | U <sub>11</sub> | U <sub>22</sub> | U <sub>33</sub> | U <sub>23</sub> | U <sub>13</sub> | U <sub>12</sub> |
|------|-----------------|-----------------|-----------------|-----------------|-----------------|-----------------|
| O10  | 31.3(13)        | 53.7(18)        | 37.4(15)        | 9.7(13)         | 11.5(11)        | 17.5(12)        |
| N2   | 33.2(16)        | 34.0(17)        | 27.1(16)        | 3.6(13)         | 4.0(13)         | 10.0(13)        |
| C1   | 38(2)           | 31(2)           | 30.9(19)        | 4.6(15)         | 8.3(16)         | 14.3(16)        |
| C2   | 40(2)           | 45(2)           | 32(2)           | 7.6(17)         | 8.6(17)         | 12.6(18)        |
| C3   | 51(3)           | 55(3)           | 35(2)           | 7.8(19)         | -0.3(19)        | 22(2)           |
| C4   | 39(2)           | 59(3)           | 46(3)           | 0(2)            | -2.0(19)        | 22(2)           |
| C5   | 38(2)           | 64(3)           | 53(3)           | 6(2)            | 16(2)           | 15(2)           |
| C6   | 49(2)           | 51(3)           | 40(2)           | 13.6(19)        | 13.5(19)        | 15(2)           |
| C7   | 41(2)           | 37(2)           | 32(2)           | 8.0(16)         | 10.8(16)        | 15.6(17)        |
| C8   | 36.1(19)        | 28.7(19)        | 33(2)           | 7.5(15)         | 9.9(16)         | 7.7(15)         |
| C9   | 34.2(19)        | 42(2)           | 27.5(19)        | 9.5(16)         | 4.7(15)         | 13.4(17)        |
| C10  | 39(2)           | 44(2)           | 26.8(19)        | 1.1(16)         | 2.4(16)         | 12.9(18)        |
| C11  | 33.0(19)        | 39(2)           | 31(2)           | 2.7(16)         | 0.8(15)         | 11.0(16)        |
| C12  | 37(2)           | 35(2)           | 27.5(18)        | 3.6(15)         | 5.3(15)         | 9.6(16)         |
| C13  | 32.2(19)        | 34(2)           | 30.0(19)        | 5.4(15)         | 2.6(15)         | 9.3(16)         |
| C14  | 31.0(18)        | 30.4(19)        | 28.6(18)        | 4.6(15)         | 6.8(14)         | 7.4(15)         |
| C15  | 27.3(17)        | 40(2)           | 23.1(17)        | 6.6(15)         | 5.9(14)         | 6.1(15)         |
| C16  | 26.2(17)        | 41(2)           | 30.9(19)        | 7.0(16)         | 3.9(15)         | 8.3(16)         |
| C17  | 36(2)           | 45(2)           | 38(2)           | 8.9(18)         | 7.1(17)         | 10.2(18)        |
| C18  | 28.2(19)        | 57(3)           | 32(2)           | 9.3(18)         | 1.1(16)         | 10.8(18)        |
| C19  | 31.4(19)        | 49(2)           | 28.7(19)        | 4.8(17)         | 3.7(15)         | 0.2(17)         |

**Table 3 Anisotropic Displacement Parameters ( $\text{\AA}^2 \times 10^3$ ) for 3aa. The Anisotropic displacement factor exponent takes the form:  $-2\pi^2[h^2a^*U_{11}+2hka^*b^*U_{12}+\dots]$ .**

| Atom | U <sub>11</sub> | U <sub>22</sub> | U <sub>33</sub> | U <sub>23</sub> | U <sub>13</sub> | U <sub>12</sub> |
|------|-----------------|-----------------|-----------------|-----------------|-----------------|-----------------|
| C20  | 32.3(19)        | 40(2)           | 26.5(18)        | 3.1(16)         | 6.5(15)         | 5.6(16)         |
| C21  | 32.4(18)        | 37(2)           | 25.1(18)        | 8.0(15)         | 10.4(15)        | 7.8(16)         |
| C22  | 38(2)           | 37(2)           | 41(2)           | 10.0(17)        | 7.2(17)         | 6.7(17)         |
| C23  | 36(2)           | 49(3)           | 43(2)           | 21(2)           | 4.7(18)         | 12.9(19)        |
| C24  | 32.3(19)        | 51(2)           | 29.3(19)        | 13.0(17)        | 10.8(16)        | 6.2(17)         |
| C25  | 44(2)           | 44(2)           | 30(2)           | 3.3(17)         | 5.0(17)         | 7.3(19)         |
| C26  | 40(2)           | 39(2)           | 31(2)           | 6.9(16)         | 8.0(16)         | 16.1(17)        |
| C27  | 37(2)           | 69(3)           | 35(2)           | 15(2)           | 4.4(18)         | 10(2)           |
| C28  | 46(2)           | 50(3)           | 31(2)           | 5.9(18)         | 1.4(17)         | 29(2)           |
| C29  | 78(3)           | 256(7)          | 47(3)           | -31(4)          | 9(2)            | 87(4)           |
| C30  | 76(3)           | 249(7)          | 53(3)           | -39(4)          | 7(3)            | 83(4)           |

**Table 4 Bond Lengths for 3aa.**

| Atom | Atom | Length/ $\text{\AA}$ | Atom | Atom | Length/ $\text{\AA}$ |
|------|------|----------------------|------|------|----------------------|
| S1   | O1   | 1.434(3)             | S2   | O9   | 1.427(3)             |
| S1   | O2   | 1.428(3)             | S2   | O10  | 1.431(3)             |
| S1   | N1   | 1.645(3)             | S2   | N2   | 1.644(3)             |
| S1   | C54  | 1.763(4)             | S2   | C21  | 1.764(4)             |
| O3   | C45  | 1.331(4)             | O6   | C28  | 1.210(5)             |
| O3   | C46  | 1.454(4)             | O7   | C28  | 1.326(6)             |

**Table 4 Bond Lengths for 3aa.**

| Atom | Atom | Length/Å | Atom | Atom | Length/Å |
|------|------|----------|------|------|----------|
| O4   | C45  | 1.211(5) | O7   | C29  | 1.429(6) |
| O5   | C40  | 1.206(5) | O8   | C9   | 1.209(5) |
| N1   | C39  | 1.476(5) | N2   | C12  | 1.487(5) |
| N1   | C44  | 1.437(5) | N2   | C14  | 1.445(5) |
| C31  | C32  | 1.397(5) | C1   | C2   | 1.389(5) |
| C31  | C36  | 1.387(5) | C1   | C6   | 1.381(6) |
| C31  | C37  | 1.491(5) | C1   | C8   | 1.494(5) |
| C32  | C33  | 1.386(6) | C2   | C3   | 1.391(6) |
| C33  | C34  | 1.380(7) | C3   | C4   | 1.378(7) |
| C34  | C35  | 1.376(7) | C4   | C5   | 1.376(7) |
| C35  | C36  | 1.394(6) | C5   | C6   | 1.394(6) |
| C37  | C38  | 1.341(5) | C7   | C8   | 1.337(5) |
| C37  | C40  | 1.509(5) | C7   | C12  | 1.515(5) |
| C38  | C39  | 1.518(5) | C8   | C9   | 1.506(5) |
| C40  | C41  | 1.506(6) | C9   | C10  | 1.507(5) |
| C41  | C42  | 1.548(5) | C10  | C11  | 1.536(5) |
| C42  | C43  | 1.510(5) | C11  | C13  | 1.517(5) |
| C43  | C44  | 1.345(5) | C13  | C14  | 1.346(5) |
| C43  | C45  | 1.497(5) | C13  | C28  | 1.483(5) |
| C44  | C48  | 1.494(5) | C14  | C15  | 1.488(5) |
| C46  | C47  | 1.500(6) | C15  | C16  | 1.385(5) |

**Table 4 Bond Lengths for 3aa.**

| Atom | Atom | Length/Å | Atom | Atom | Length/Å |
|------|------|----------|------|------|----------|
| C48  | C49  | 1.404(5) | C15  | C20  | 1.403(5) |
| C48  | C53  | 1.376(5) | C16  | C17  | 1.391(5) |
| C49  | C50  | 1.395(5) | C17  | C18  | 1.391(6) |
| C50  | C51  | 1.376(6) | C18  | C19  | 1.384(6) |
| C51  | C52  | 1.392(6) | C19  | C20  | 1.384(5) |
| C52  | C53  | 1.394(5) | C21  | C22  | 1.376(5) |
| C54  | C55  | 1.386(5) | C21  | C26  | 1.391(5) |
| C54  | C59  | 1.369(6) | C22  | C23  | 1.392(6) |
| C55  | C56  | 1.384(5) | C23  | C24  | 1.379(6) |
| C56  | C57  | 1.392(6) | C24  | C25  | 1.386(6) |
| C57  | C58  | 1.376(6) | C24  | C27  | 1.505(5) |
| C57  | C60  | 1.516(5) | C25  | C26  | 1.383(5) |
| C58  | C59  | 1.389(6) | C29  | C30  | 1.386(6) |

**Table 5 Bond Angles for 3aa**

| Atom | Atom | Atom | Angle/°    | Atom | Atom | Atom | Angle/°    |
|------|------|------|------------|------|------|------|------------|
| O1   | S1   | N1   | 105.05(16) | O9   | S2   | O10  | 121.21(18) |
| O1   | S1   | C54  | 108.05(17) | O9   | S2   | N2   | 106.23(17) |
| O2   | S1   | O1   | 121.16(16) | O9   | S2   | C21  | 107.78(18) |
| O2   | S1   | N1   | 106.03(16) | O10  | S2   | N2   | 104.89(17) |
| O2   | S1   | C54  | 107.65(17) | O10  | S2   | C21  | 107.11(18) |

**Table 5 Bond Angles for 3aa**

| Atom | Atom | Atom | Angle/°    | Atom | Atom | Atom | Angle/°    |
|------|------|------|------------|------|------|------|------------|
| N1   | S1   | C54  | 108.33(16) | N2   | S2   | C21  | 109.21(17) |
| C45  | O3   | C46  | 115.2(3)   | C28  | O7   | C29  | 114.2(5)   |
| C39  | N1   | S1   | 119.1(2)   | C12  | N2   | S2   | 118.2(2)   |
| C44  | N1   | S1   | 119.5(2)   | C14  | N2   | S2   | 121.3(3)   |
| C44  | N1   | C39  | 119.3(3)   | C14  | N2   | C12  | 119.0(3)   |
| C32  | C31  | C37  | 119.7(4)   | C2   | C1   | C8   | 119.4(4)   |
| C36  | C31  | C32  | 118.4(4)   | C6   | C1   | C2   | 118.4(4)   |
| C36  | C31  | C37  | 121.9(4)   | C6   | C1   | C8   | 122.2(4)   |
| C33  | C32  | C31  | 120.8(4)   | C1   | C2   | C3   | 120.9(4)   |
| C34  | C33  | C32  | 120.2(4)   | C4   | C3   | C2   | 119.9(4)   |
| C35  | C34  | C33  | 119.6(4)   | C5   | C4   | C3   | 119.7(4)   |
| C34  | C35  | C36  | 120.5(4)   | C4   | C5   | C6   | 120.3(4)   |
| C31  | C36  | C35  | 120.5(4)   | C1   | C6   | C5   | 120.7(4)   |
| C31  | C37  | C40  | 115.6(3)   | C8   | C7   | C12  | 124.4(4)   |
| C38  | C37  | C31  | 123.8(4)   | C1   | C8   | C9   | 115.4(3)   |
| C38  | C37  | C40  | 120.0(3)   | C7   | C8   | C1   | 124.1(4)   |
| C37  | C38  | C39  | 123.7(4)   | C7   | C8   | C9   | 120.2(3)   |
| N1   | C39  | C38  | 113.2(3)   | O8   | C9   | C8   | 122.4(4)   |
| O5   | C40  | C37  | 122.7(4)   | O8   | C9   | C10  | 122.6(4)   |
| O5   | C40  | C41  | 122.7(4)   | C8   | C9   | C10  | 115.0(3)   |
| C41  | C40  | C37  | 114.6(3)   | C9   | C10  | C11  | 111.7(3)   |



**Table 5 Bond Angles for 3aa**

| Atom | Atom | Atom | Angle/°  | Atom | Atom | Atom | Angle/°  |
|------|------|------|----------|------|------|------|----------|
| C40  | C41  | C42  | 110.5(3) | C13  | C11  | C10  | 112.7(3) |
| C43  | C42  | C41  | 111.4(3) | N2   | C12  | C7   | 114.2(3) |
| C44  | C43  | C42  | 125.6(3) | C14  | C13  | C11  | 124.9(4) |
| C44  | C43  | C45  | 121.8(3) | C14  | C13  | C28  | 122.4(3) |
| C45  | C43  | C42  | 112.6(3) | C28  | C13  | C11  | 112.7(3) |
| N1   | C44  | C48  | 117.8(3) | N2   | C14  | C15  | 117.7(3) |
| C43  | C44  | N1   | 118.3(3) | C13  | C14  | N2   | 118.2(3) |
| C43  | C44  | C48  | 123.9(3) | C13  | C14  | C15  | 124.0(3) |
| O3   | C45  | C43  | 112.8(3) | C16  | C15  | C14  | 121.1(3) |
| O4   | C45  | O3   | 124.0(3) | C16  | C15  | C20  | 118.8(3) |
| O4   | C45  | C43  | 123.1(3) | C20  | C15  | C14  | 120.1(4) |
| O3   | C46  | C47  | 106.9(3) | C15  | C16  | C17  | 121.3(4) |
| C49  | C48  | C44  | 119.6(3) | C18  | C17  | C16  | 119.5(4) |
| C53  | C48  | C44  | 121.3(3) | C19  | C18  | C17  | 119.4(4) |
| C53  | C48  | C49  | 119.1(3) | C18  | C19  | C20  | 121.2(4) |
| C50  | C49  | C48  | 119.5(4) | C19  | C20  | C15  | 119.7(4) |
| C51  | C50  | C49  | 120.9(4) | C22  | C21  | S2   | 120.2(3) |
| C50  | C51  | C52  | 119.7(4) | C22  | C21  | C26  | 121.1(4) |
| C51  | C52  | C53  | 119.5(4) | C26  | C21  | S2   | 118.8(3) |
| C48  | C53  | C52  | 121.2(4) | C21  | C22  | C23  | 119.3(4) |
| C55  | C54  | S1   | 118.3(3) | C24  | C23  | C22  | 121.3(4) |

**Table 5 Bond Angles for 3aa**

| Atom | Atom | Atom | Angle/°  | Atom | Atom | Atom | Angle/°  |
|------|------|------|----------|------|------|------|----------|
| C59  | C54  | S1   | 121.1(3) | C23  | C24  | C25  | 117.7(4) |
| C59  | C54  | C55  | 120.5(4) | C23  | C24  | C27  | 121.5(4) |
| C56  | C55  | C54  | 118.8(4) | C25  | C24  | C27  | 120.9(4) |
| C55  | C56  | C57  | 121.2(4) | C26  | C25  | C24  | 122.7(4) |
| C56  | C57  | C60  | 120.1(4) | C25  | C26  | C21  | 117.8(4) |
| C58  | C57  | C56  | 118.9(4) | O6   | C28  | O7   | 124.0(4) |
| C58  | C57  | C60  | 121.0(4) | O6   | C28  | C13  | 122.8(4) |
| C57  | C58  | C59  | 120.2(4) | O7   | C28  | C13  | 113.1(4) |
| C54  | C59  | C58  | 120.3(4) | C30  | C29  | O7   | 114.7(5) |

**Table 6 Torsion Angles for 3aa.**

| A  | B   | C   | D   | Angle/°   | A  | B   | C   | D   | Angle/°   |
|----|-----|-----|-----|-----------|----|-----|-----|-----|-----------|
| S1 | N1  | C39 | C38 | 84.2(3)   | S2 | N2  | C12 | C7  | -81.0(4)  |
| S1 | N1  | C44 | C43 | -112.0(3) | S2 | N2  | C14 | C13 | 117.3(4)  |
| S1 | N1  | C44 | C48 | 68.8(4)   | S2 | N2  | C14 | C15 | -65.4(4)  |
| S1 | C54 | C55 | C56 | 177.4(3)  | S2 | C21 | C22 | C23 | 179.8(3)  |
| S1 | C54 | C59 | C58 | -177.8(3) | S2 | C21 | C26 | C25 | -178.8(3) |
| O1 | S1  | N1  | C39 | -31.0(3)  | O8 | C9  | C10 | C11 | 118.9(4)  |
| O1 | S1  | N1  | C44 | 165.5(3)  | O9 | S2  | N2  | C12 | 162.3(3)  |
| O1 | S1  | C54 | C55 | 35.0(3)   | O9 | S2  | N2  | C14 | -31.6(3)  |
| O1 | S1  | C54 | C59 | -146.8(3) | O9 | S2  | C21 | C22 | 14.4(4)   |

**Table 6 Torsion Angles for 3aa.**

| A   | B   | C   | D   | Angle/°   | A   | B   | C   | D   | Angle/°   |
|-----|-----|-----|-----|-----------|-----|-----|-----|-----|-----------|
| O2  | S1  | N1  | C39 | -160.5(3) | O9  | S2  | C21 | C26 | -165.2(3) |
| O2  | S1  | N1  | C44 | 36.1(3)   | O10 | S2  | N2  | C12 | 32.8(3)   |
| O2  | S1  | C54 | C55 | 167.4(3)  | O10 | S2  | N2  | C14 | -161.1(3) |
| O2  | S1  | C54 | C59 | -14.3(4)  | O10 | S2  | C21 | C22 | 146.3(3)  |
| O5  | C40 | C41 | C42 | -113.1(4) | O10 | S2  | C21 | C26 | -33.3(3)  |
| N1  | S1  | C54 | C55 | -78.3(3)  | N2  | S2  | C21 | C22 | -100.6(3) |
| N1  | S1  | C54 | C59 | 99.9(3)   | N2  | S2  | C21 | C26 | 79.8(3)   |
| N1  | C44 | C48 | C49 | 43.1(5)   | N2  | C14 | C15 | C16 | 140.1(4)  |
| N1  | C44 | C48 | C53 | -137.1(4) | N2  | C14 | C15 | C20 | -42.2(5)  |
| C31 | C32 | C33 | C34 | -0.7(7)   | C1  | C2  | C3  | C4  | -1.4(7)   |
| C31 | C37 | C38 | C39 | -172.4(4) | C1  | C8  | C9  | O8  | 106.4(4)  |
| C31 | C37 | C40 | O5  | -116.2(4) | C1  | C8  | C9  | C10 | -74.2(4)  |
| C31 | C37 | C40 | C41 | 66.2(4)   | C2  | C1  | C6  | C5  | -0.2(7)   |
| C32 | C31 | C36 | C35 | -1.6(6)   | C2  | C1  | C8  | C7  | 145.1(4)  |
| C32 | C31 | C37 | C38 | -149.7(4) | C2  | C1  | C8  | C9  | -41.0(5)  |
| C32 | C31 | C37 | C40 | 39.5(5)   | C2  | C3  | C4  | C5  | 0.8(7)    |
| C32 | C33 | C34 | C35 | -0.4(7)   | C3  | C4  | C5  | C6  | 0.1(7)    |
| C33 | C34 | C35 | C36 | 0.5(7)    | C4  | C5  | C6  | C1  | -0.4(7)   |
| C34 | C35 | C36 | C31 | 0.6(7)    | C6  | C1  | C2  | C3  | 1.1(6)    |
| C36 | C31 | C32 | C33 | 1.7(6)    | C6  | C1  | C8  | C7  | -35.8(6)  |
| C36 | C31 | C37 | C38 | 33.1(6)   | C6  | C1  | C8  | C9  | 138.1(4)  |

**Table 6 Torsion Angles for 3aa.**

| A   | B   | C   | D   | Angle/°   | A   | B   | C   | D   | Angle/°   |
|-----|-----|-----|-----|-----------|-----|-----|-----|-----|-----------|
| C36 | C31 | C37 | C40 | -137.7(4) | C7  | C8  | C9  | O8  | -79.5(5)  |
| C37 | C31 | C32 | C33 | -175.5(4) | C7  | C8  | C9  | C10 | 99.9(4)   |
| C37 | C31 | C36 | C35 | 175.5(4)  | C8  | C1  | C2  | C3  | -179.8(4) |
| C37 | C38 | C39 | N1  | 85.3(5)   | C8  | C1  | C6  | C5  | -179.3(4) |
| C37 | C40 | C41 | C42 | 64.5(4)   | C8  | C7  | C12 | N2  | -90.4(5)  |
| C38 | C37 | C40 | O5  | 72.7(5)   | C8  | C9  | C10 | C11 | -60.5(4)  |
| C38 | C37 | C40 | C41 | -105.0(4) | C9  | C10 | C11 | C13 | -69.7(4)  |
| C39 | N1  | C44 | C43 | 84.7(4)   | C10 | C11 | C13 | C14 | 112.1(4)  |
| C39 | N1  | C44 | C48 | -94.6(4)  | C10 | C11 | C13 | C28 | -67.9(4)  |
| C40 | C37 | C38 | C39 | -2.0(6)   | C11 | C13 | C14 | N2  | -11.4(6)  |
| C40 | C41 | C42 | C43 | 66.6(4)   | C11 | C13 | C14 | C15 | 171.4(4)  |
| C41 | C42 | C43 | C44 | -107.0(4) | C11 | C13 | C28 | O6  | -41.9(6)  |
| C41 | C42 | C43 | C45 | 73.0(4)   | C11 | C13 | C28 | O7  | 134.0(4)  |
| C42 | C43 | C44 | N1  | 5.9(6)    | C12 | N2  | C14 | C13 | -76.7(4)  |
| C42 | C43 | C44 | C48 | -175.0(3) | C12 | N2  | C14 | C15 | 100.7(4)  |
| C42 | C43 | C45 | O3  | -128.5(3) | C12 | C7  | C8  | C1  | 176.6(4)  |
| C42 | C43 | C45 | O4  | 49.1(5)   | C12 | C7  | C8  | C9  | 3.0(6)    |
| C43 | C44 | C48 | C49 | -136.1(4) | C13 | C14 | C15 | C16 | -42.8(6)  |
| C43 | C44 | C48 | C53 | 43.7(5)   | C13 | C14 | C15 | C20 | 134.9(4)  |
| C44 | N1  | C39 | C38 | -112.3(4) | C14 | N2  | C12 | C7  | 112.5(4)  |
| C44 | C43 | C45 | O3  | 51.5(5)   | C14 | C13 | C28 | O6  | 138.1(4)  |

**Table 6 Torsion Angles for 3aa.**

| A   | B   | C   | D   | Angle/°   | A   | B   | C   | D   | Angle/°   |
|-----|-----|-----|-----|-----------|-----|-----|-----|-----|-----------|
| C44 | C43 | C45 | O4  | -130.9(4) | C14 | C13 | C28 | O7  | -46.0(6)  |
| C44 | C48 | C49 | C50 | 176.9(3)  | C14 | C15 | C16 | C17 | 176.4(4)  |
| C44 | C48 | C53 | C52 | -177.0(4) | C14 | C15 | C20 | C19 | -175.6(3) |
| C45 | O3  | C46 | C47 | 168.5(3)  | C15 | C16 | C17 | C18 | -0.4(6)   |
| C45 | C43 | C44 | N1  | -174.1(3) | C16 | C15 | C20 | C19 | 2.2(6)    |
| C45 | C43 | C44 | C48 | 5.1(6)    | C16 | C17 | C18 | C19 | 1.3(6)    |
| C46 | O3  | C45 | O4  | 7.0(5)    | C17 | C18 | C19 | C20 | -0.4(6)   |
| C46 | O3  | C45 | C43 | -175.4(3) | C18 | C19 | C20 | C15 | -1.4(6)   |
| C48 | C49 | C50 | C51 | 0.5(6)    | C20 | C15 | C16 | C17 | -1.3(6)   |
| C49 | C48 | C53 | C52 | 2.8(6)    | C21 | S2  | N2  | C12 | -81.7(3)  |
| C49 | C50 | C51 | C52 | 1.9(6)    | C21 | S2  | N2  | C14 | 84.4(3)   |
| C50 | C51 | C52 | C53 | -2.0(6)   | C21 | C22 | C23 | C24 | -1.4(6)   |
| C51 | C52 | C53 | C48 | -0.4(6)   | C22 | C21 | C26 | C25 | 1.6(6)    |
| C53 | C48 | C49 | C50 | -2.9(5)   | C22 | C23 | C24 | C25 | 2.3(6)    |
| C54 | S1  | N1  | C39 | 84.2(3)   | C22 | C23 | C24 | C27 | -178.9(4) |
| C54 | S1  | N1  | C44 | -79.2(3)  | C23 | C24 | C25 | C26 | -1.3(6)   |
| C54 | C55 | C56 | C57 | 0.2(6)    | C24 | C25 | C26 | C21 | -0.6(6)   |
| C55 | C54 | C59 | C58 | 0.4(6)    | C26 | C21 | C22 | C23 | -0.6(6)   |
| C55 | C56 | C57 | C58 | 1.1(6)    | C27 | C24 | C25 | C26 | 179.9(4)  |
| C55 | C56 | C57 | C60 | -179.2(4) | C28 | O7  | C29 | C30 | -142.0(8) |
| C56 | C57 | C58 | C59 | -1.5(6)   | C28 | C13 | C14 | N2  | 168.6(4)  |

**Table 6 Torsion Angles for 3aa.**

| A   | B   | C   | D   | Angle/°  | A   | B   | C   | D   | Angle/°  |
|-----|-----|-----|-----|----------|-----|-----|-----|-----|----------|
| C57 | C58 | C59 | C54 | 0.8(6)   | C28 | C13 | C14 | C15 | -8.6(6)  |
| C59 | C54 | C55 | C56 | -0.9(6)  | C29 | O7  | C28 | O6  | -7.0(7)  |
| C60 | C57 | C58 | C59 | 178.7(4) | C29 | O7  | C28 | C13 | 177.1(5) |

**Table 7 Hydrogen Atom Coordinates ( $\text{\AA} \times 10^4$ ) and Isotropic Displacement Parameters ( $\text{\AA}^2 \times 10^3$ ) for 3aa.**

| Atom | x       | y       | z       | U(eq) |
|------|---------|---------|---------|-------|
| H32  | 4314.93 | 5213.69 | 2027.22 | 49    |
| H33  | 6663.69 | 5043.8  | 2496.52 | 56    |
| H34  | 8693.7  | 5447.74 | 2004.65 | 58    |
| H35  | 8362.09 | 6010.2  | 1037.63 | 56    |
| H36  | 6012.73 | 6186.36 | 561.54  | 47    |
| H38  | 3366.77 | 5579.49 | 42.89   | 40    |
| H39A | 972.64  | 5744.6  | -359.65 | 38    |
| H39B | 704.22  | 5979.33 | 353.97  | 38    |
| H41A | 4498.1  | 7422.9  | 2056.34 | 42    |
| H41B | 2959.48 | 7610.1  | 2191.72 | 42    |
| H42A | 4143.13 | 8776.88 | 1599.38 | 40    |
| H42B | 3932.61 | 7889.38 | 1010.47 | 40    |
| H46A | -648.46 | 9577.51 | 2011.85 | 50    |
| H46B | -211.02 | 8986.36 | 2556.59 | 50    |

**Table 7 Hydrogen Atom Coordinates ( $\text{\AA}\times 10^4$ ) and Isotropic Displacement Parameters ( $\text{\AA}^2\times 10^3$ ) for 3aa.**

| Atom | <i>x</i> | <i>y</i> | <i>z</i> | U(eq) |
|------|----------|----------|----------|-------|
| H47A | -2859.03 | 8330.78  | 1551.44  | 68    |
| H47B | -2834.91 | 8696.79  | 2294.35  | 68    |
| H47C | -2410.81 | 7699.82  | 2064.49  | 68    |
| H49  | -1418.85 | 6587.34  | -246.7   | 39    |
| H50  | -3788.64 | 6848.33  | -603.71  | 46    |
| H51  | -4203.95 | 8400.93  | -349.12  | 48    |
| H52  | -2201.76 | 9741.16  | 223.52   | 47    |
| H53  | 165.58   | 9484.08  | 583.7    | 41    |
| H55  | 389.33   | 5928.09  | -1506.61 | 44    |
| H56  | -1799.09 | 5668.48  | -2300.63 | 50    |
| H58  | -1677.38 | 8554.29  | -1864.82 | 49    |
| H59  | 493.01   | 8813.64  | -1059.82 | 47    |
| H60A | -3424.23 | 6393.42  | -3039.78 | 79    |
| H60B | -3480.73 | 7498.58  | -2822.14 | 79    |
| H60C | -4284.93 | 6675.49  | -2490.38 | 79    |
| H2   | 6726.52  | 9662.38  | 3391.54  | 46    |
| H3   | 4440.86  | 9998.04  | 2994.76  | 56    |
| H4   | 2421.3   | 9579     | 3489.83  | 59    |
| H5   | 2712.07  | 8867.13  | 4396.72  | 61    |
| H6   | 5017.38  | 8568.81  | 4811.18  | 54    |
| H7   | 7704.7   | 9203.78  | 5338.75  | 42    |

**Table 7 Hydrogen Atom Coordinates ( $\text{\AA}\times 10^4$ ) and Isotropic Displacement Parameters ( $\text{\AA}^2\times 10^3$ ) for 3aa.**

| Atom | $x$      | $y$     | $z$     | U(eq) |
|------|----------|---------|---------|-------|
| H10A | 8202.93  | 7217.19 | 3215.94 | 45    |
| H10B | 6620.04  | 7328.03 | 3338.42 | 45    |
| H11A | 7317.16  | 6976.37 | 4411.99 | 43    |
| H11B | 7107.06  | 6067.81 | 3838.94 | 43    |
| H12A | 10366.45 | 8864.23 | 4983.93 | 40    |
| H12B | 10188.19 | 9165.78 | 5706.21 | 40    |
| H16  | 11052.36 | 5376.82 | 4814.69 | 40    |
| H17  | 13394.76 | 5099.08 | 5186.71 | 48    |
| H18  | 15391.82 | 6420.25 | 5791.38 | 48    |
| H19  | 14991.28 | 7983.35 | 6045.19 | 46    |
| H20  | 12641.11 | 8256.44 | 5699.06 | 41    |
| H22  | 10970.85 | 6345.61 | 6623.5  | 47    |
| H23  | 13077.37 | 6801.34 | 7484.74 | 50    |
| H25  | 12798.69 | 9606.97 | 7728.82 | 49    |
| H26  | 10655.33 | 9175.47 | 6894.03 | 43    |
| H27A | 15421.38 | 8927.09 | 8088.94 | 71    |
| H27B | 14819    | 7983.67 | 8364.74 | 71    |
| H27C | 14399.29 | 8978.47 | 8605.05 | 71    |
| H29A | 11493.21 | 5406.31 | 3218.88 | 153   |
| H29B | 11915.18 | 6367.84 | 2938.38 | 153   |
| H30A | 13892.85 | 5734.9  | 3237.55 | 193   |



**Table 7 Hydrogen Atom Coordinates ( $\text{\AA}\times 10^4$ ) and Isotropic Displacement Parameters ( $\text{\AA}^2\times 10^3$ ) for 3aa.**

| Atom | <i>x</i> | <i>y</i> | <i>z</i> | U(eq) |
|------|----------|----------|----------|-------|
| H30B | 13724.27 | 5973.45  | 3966.98  | 193   |
| H30C | 14144.33 | 6839.48  | 3597.37  | 193   |

**References:**

- [1]: Yan, B.; Zuo, L.; Chang, X.; Liu, T.; Cui, M.; Liu, Y.; Sun, H.; Chen, W.; Guo, W. Kinetically Controllable Pd-Catalyzed Decarboxylation Enabled [5 + 2] and [3 + 2] Cycloaddition toward Carbocycles Featuring Quaternary Carbons. *Org. Lett.* **2021**, *23*, 351-357.
- [2]: (a) Liu, H. M.; Zhang, Q. M.; Wang, L.; Tong, X. PPh<sub>3</sub>-Catalyzed Reactions of Alkyl Propiolates with N-Tosylimines: A Facile Synthesis of Alkyl 2-[aryl(tosylimino)methyl]acrylate and an Insight into the Reaction Mechanism. *Chem. Eur. J.* **2010**, *16*, 1968-1972. (b) Cheng, B.-Y.; Wang, Y.-N.; Li, T.-R.; Lu, L.-Q. Xiao, W.-J. Synthesis of Polysubstituted Pyrroles through a Formal [4+1] Cycloaddition/E1cb Elimination/Aromatization Sequence of Sulfur Ylides and  $\alpha,\beta$ -Unsaturated Imines. *J. Org. Chem.* **2017**, *82*, 12134-12140. (c) Jiang, X.; Liu, L.; Zhang, P.; Zhong, Y.; Wang, R. Catalytic Asymmetric  $\beta,\gamma$  Activation of  $\alpha,\beta$ -Unsaturated  $\gamma$ -Butyrolactams: Direct Approach to  $\beta,\gamma$ -Functionalized Dihydropyranopyrrolidin-2-ones. *Angew. Chem. Int. Ed.* **2013**, *52*, 11329-11333. (d) Ge, Y.; Qin, C.; Bai, L.; Hao, J.; Liu, J.; Luan, X. A Dearomatization/Debromination Strategy for the [4+1] Spiroannulation of Bromophenols with  $\alpha,\beta$ -Unsaturated Imines. *Angew. Chem. Int. Ed.* **2020**, *59*, 18985-18989.

## Characterization spectra of all the new products

### $^1\text{H}$ NMR (400 MHz, $\text{CDCl}_3$ ) of **3aa**

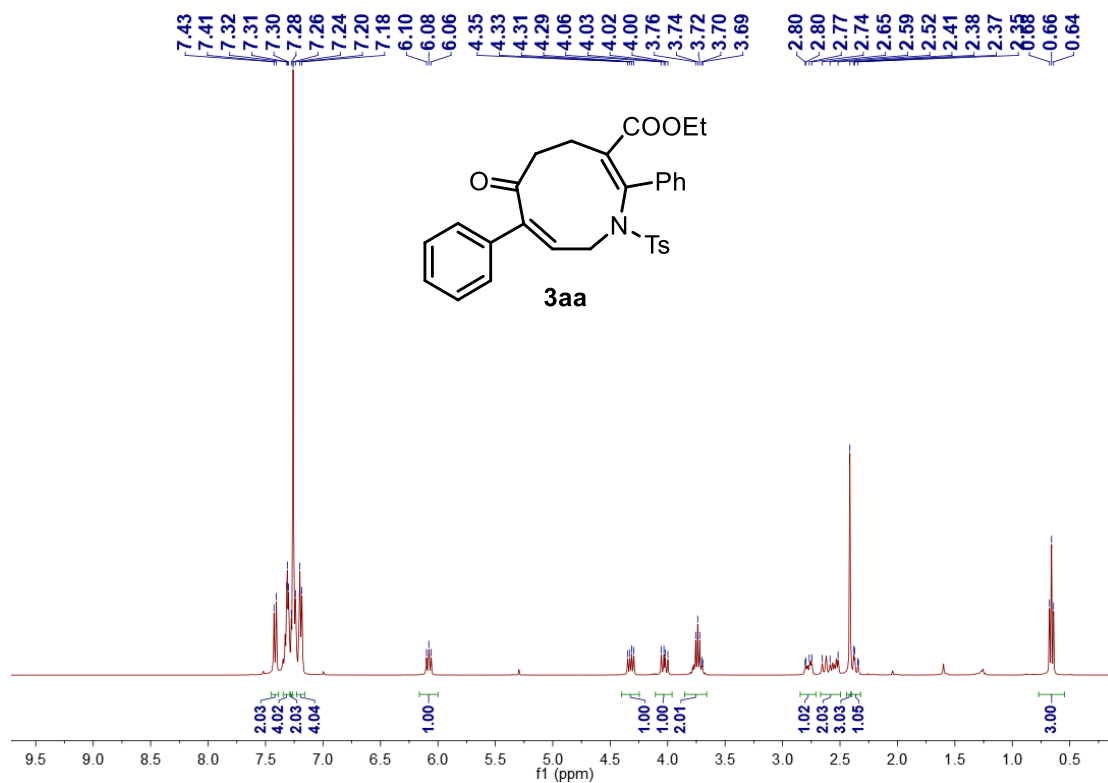

### $^{13}\text{C}$ NMR (100 MHz, $\text{CDCl}_3$ ) of **3aa**

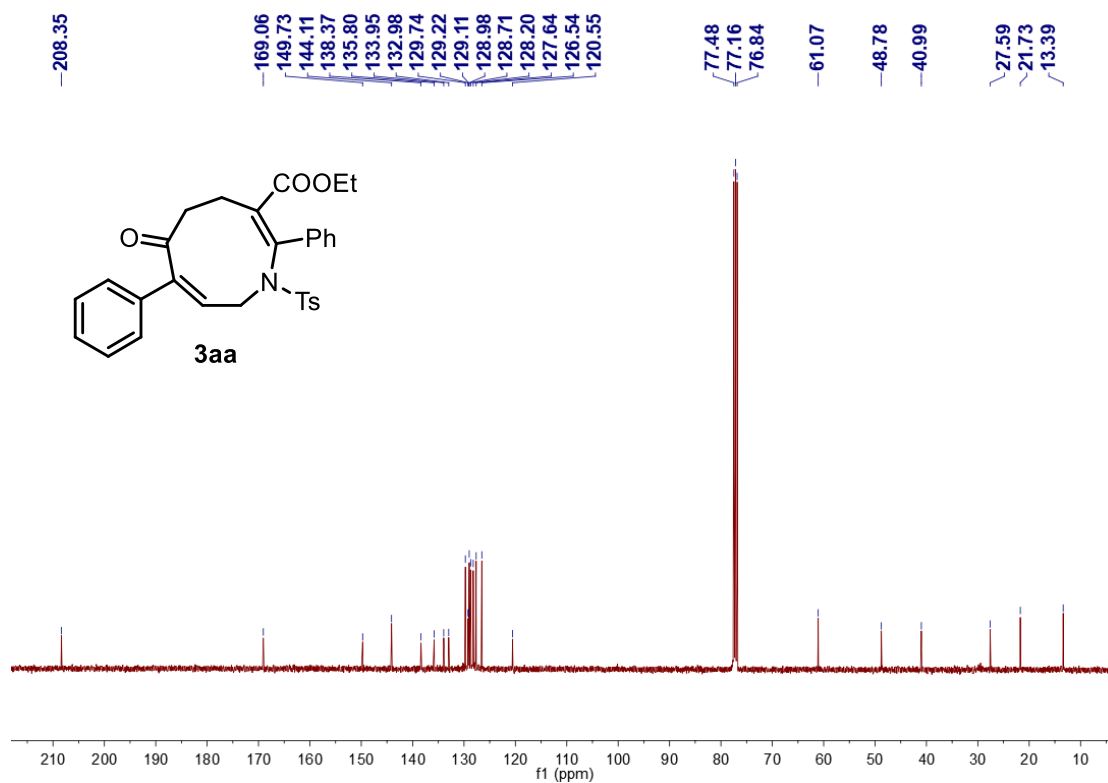

### HRMS of **3aa**

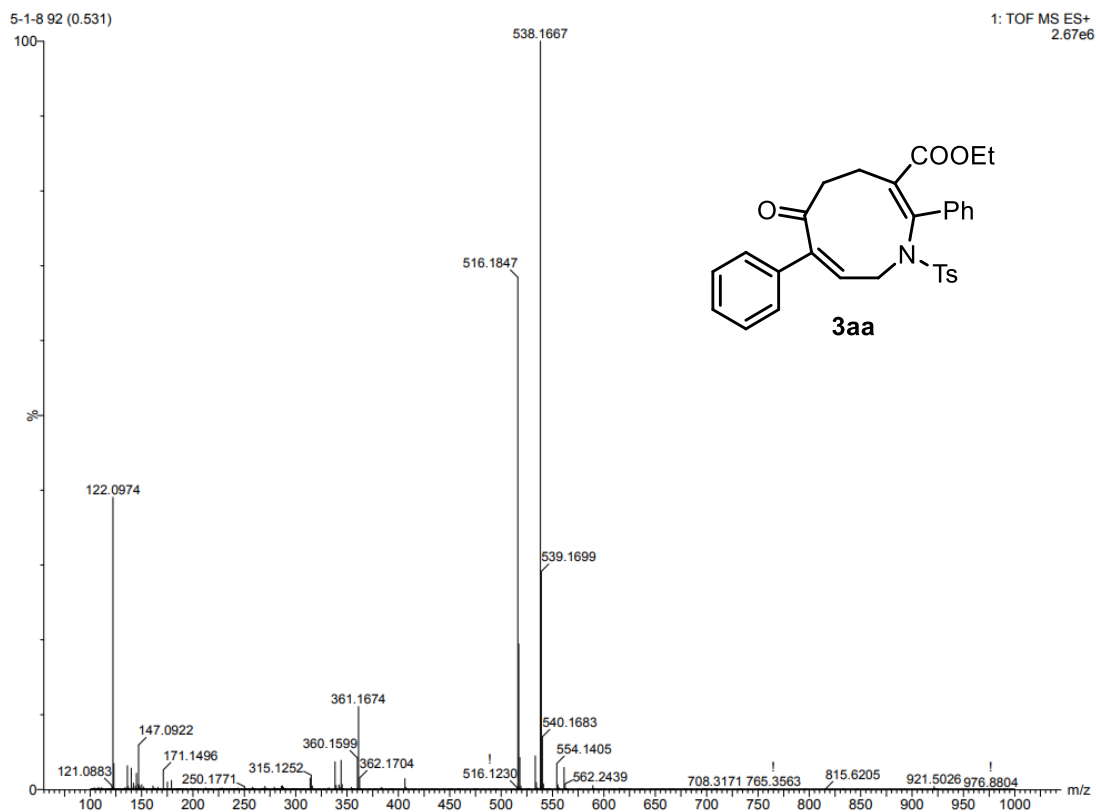

### <sup>1</sup>H NMR (400 MHz, CDCl<sub>3</sub>) of **3ba**

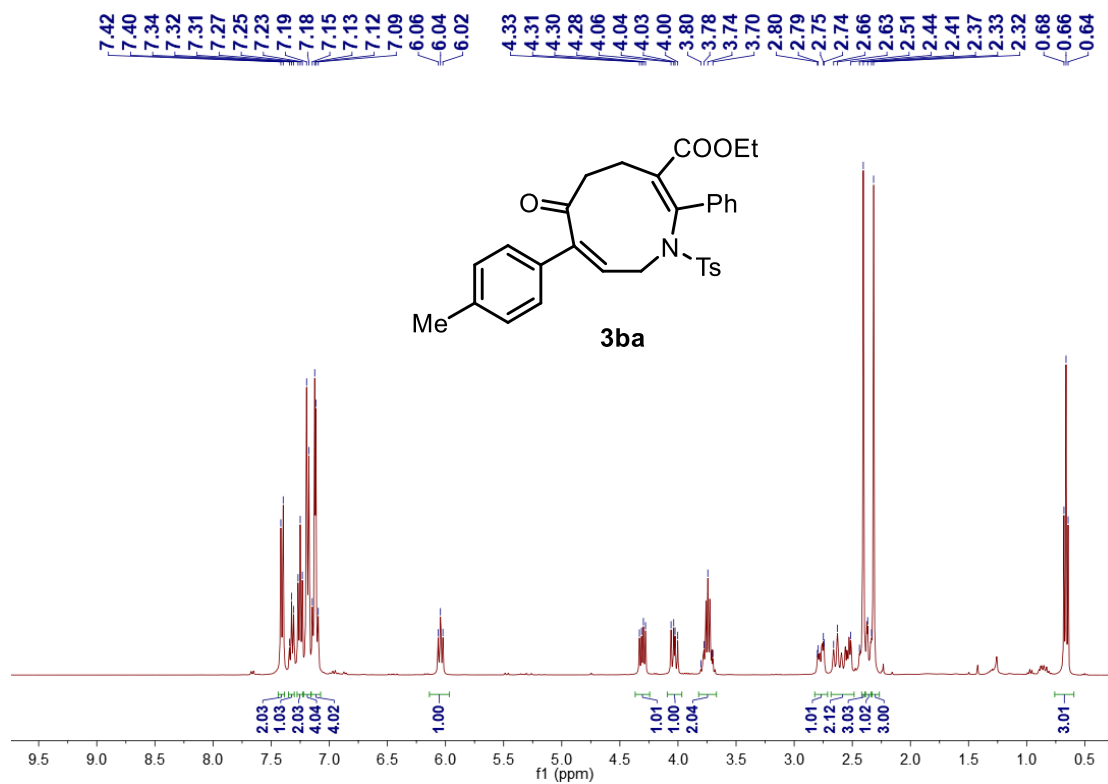

<sup>13</sup>C NMR (100 MHz, CDCl<sub>3</sub>) of **3ba**

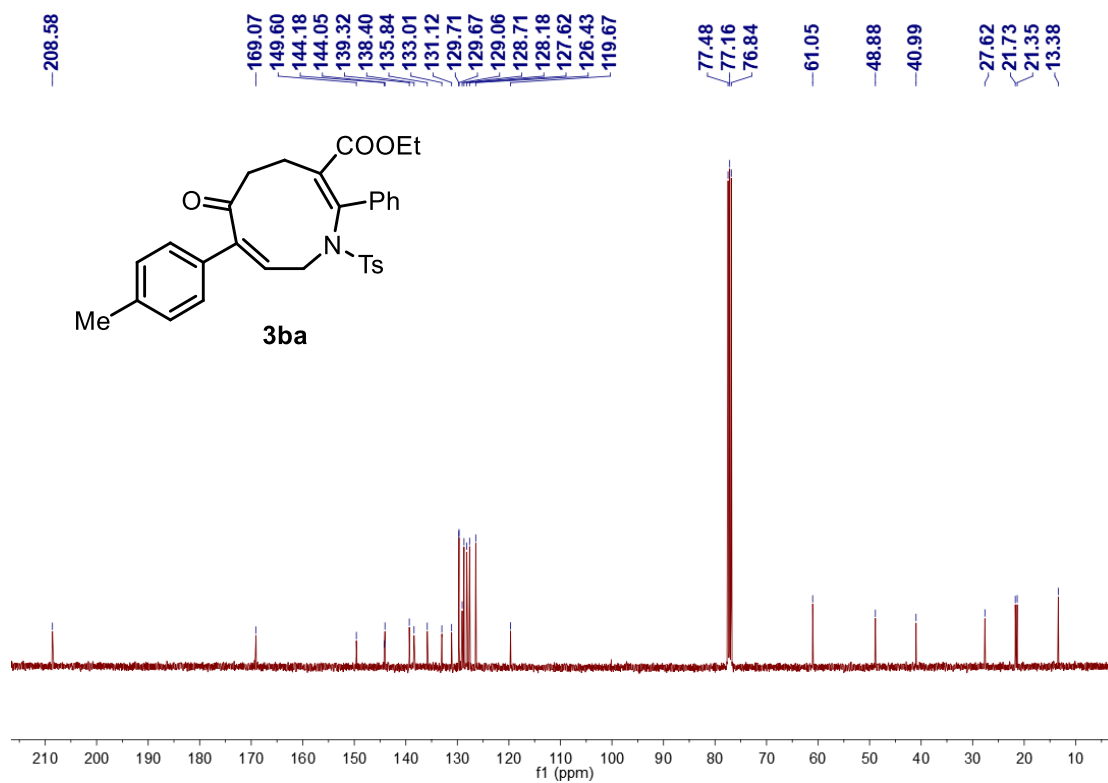

HRMS of **3ba**

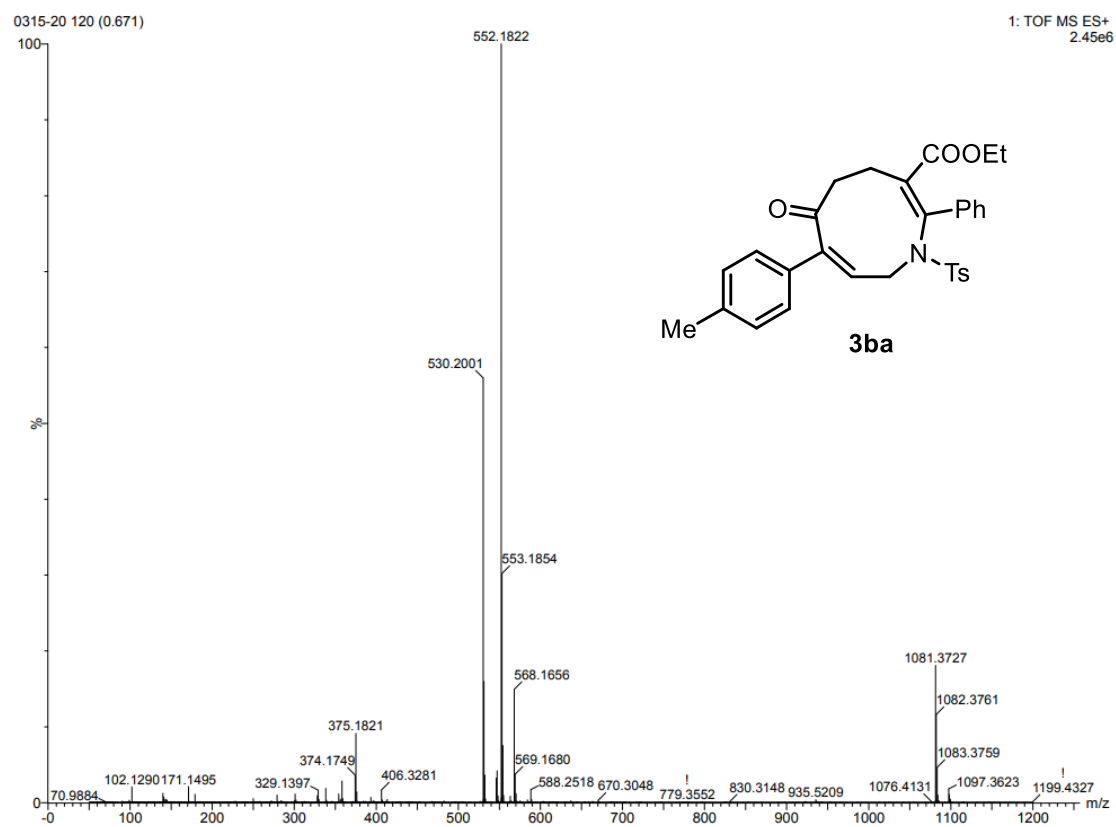

<sup>1</sup>H NMR (400 MHz, CDCl<sub>3</sub>) of **3ca**

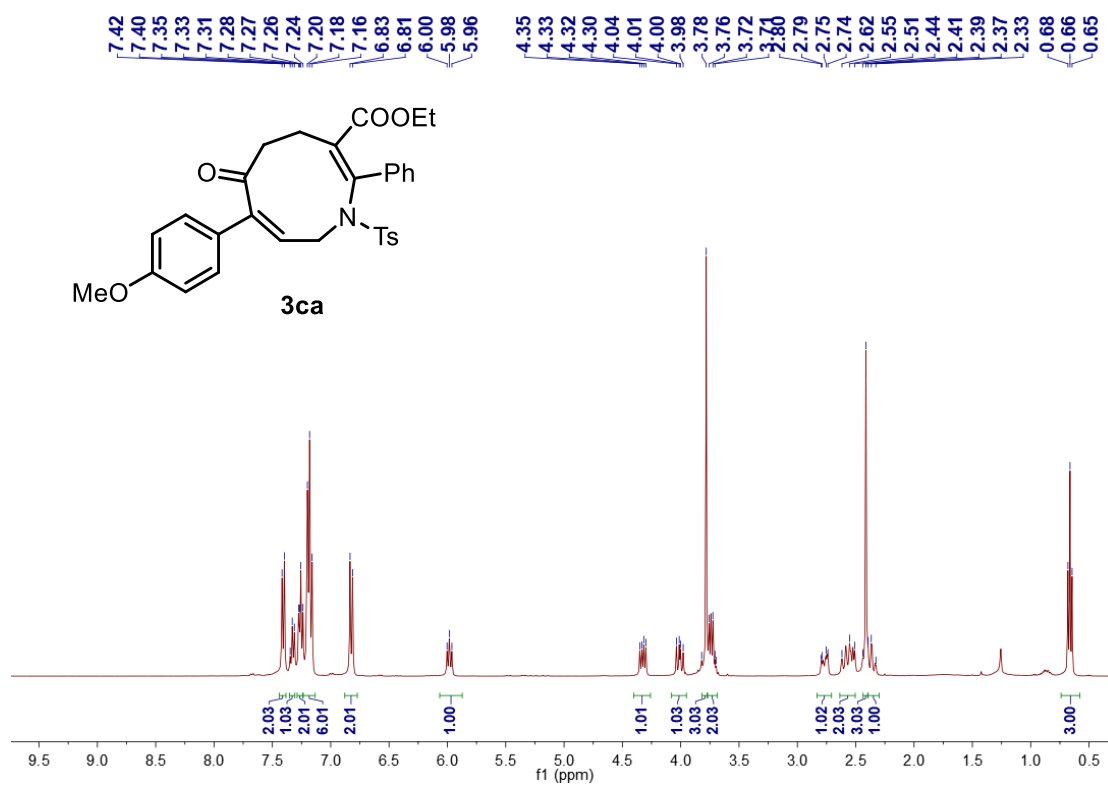

<sup>13</sup>C NMR (100 MHz, CDCl<sub>3</sub>) of **3ca**

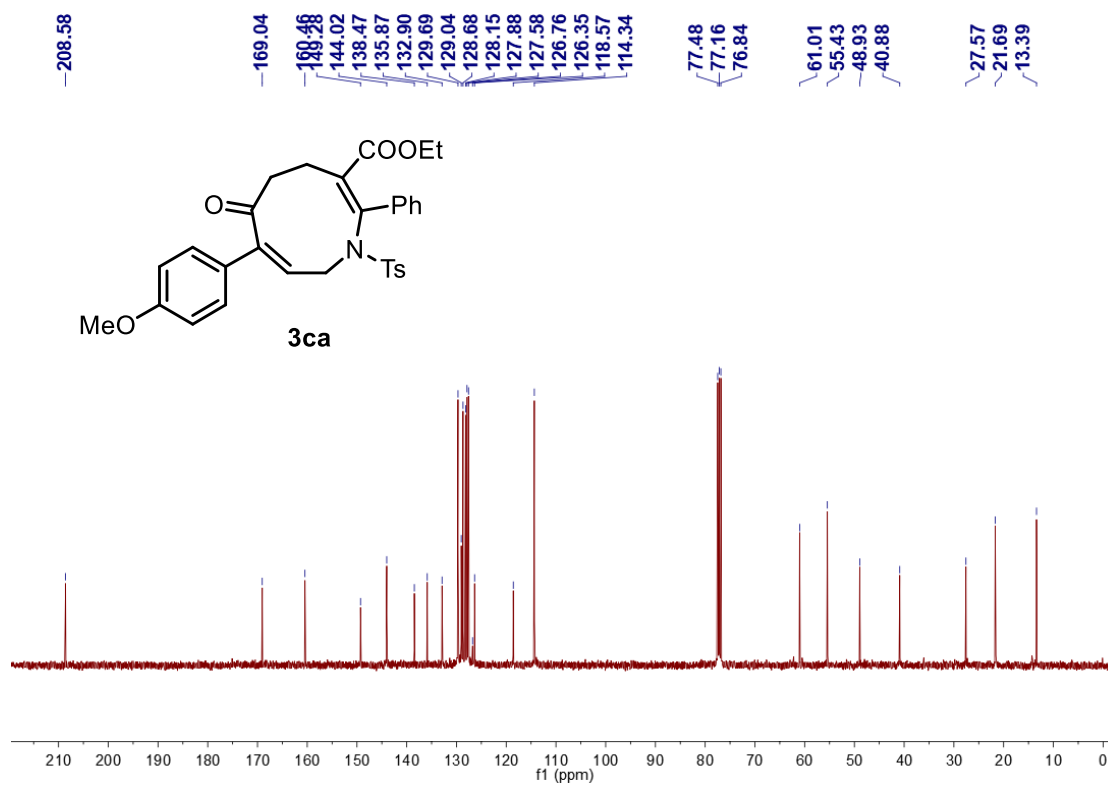

### HRMS of 3ca

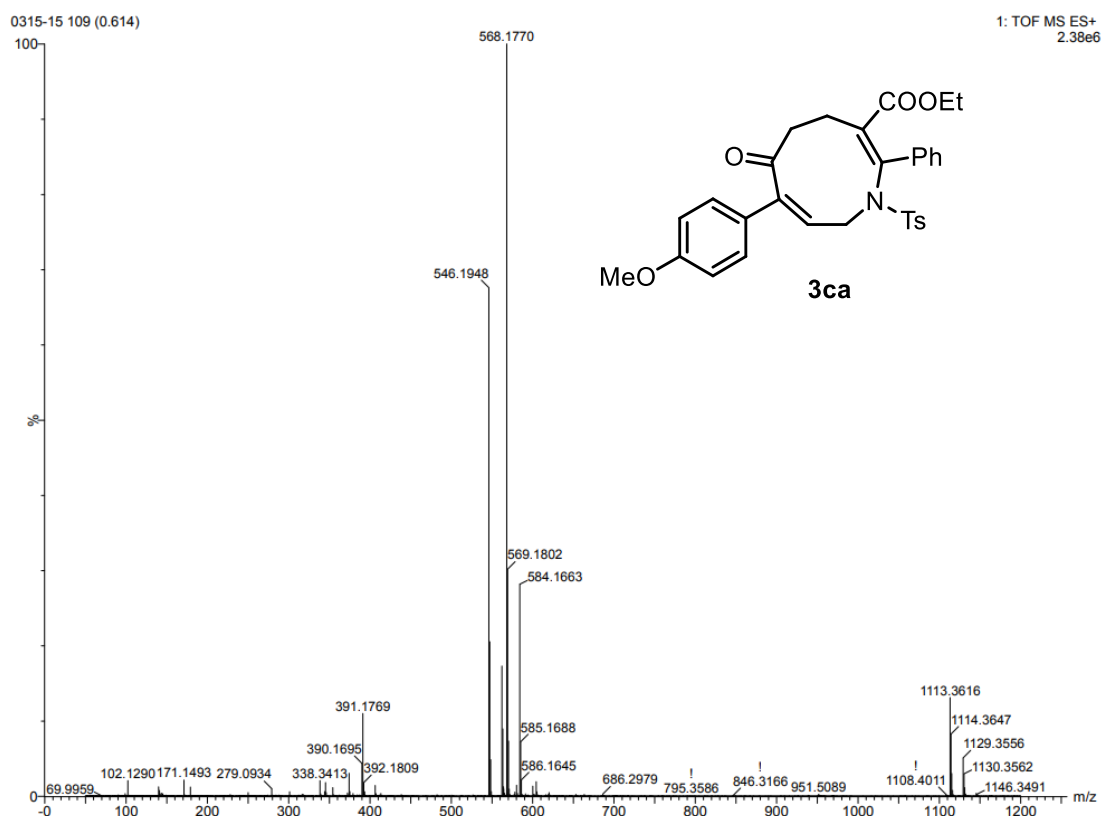

### <sup>1</sup>H NMR (400 MHz, CDCl<sub>3</sub>) of 3da

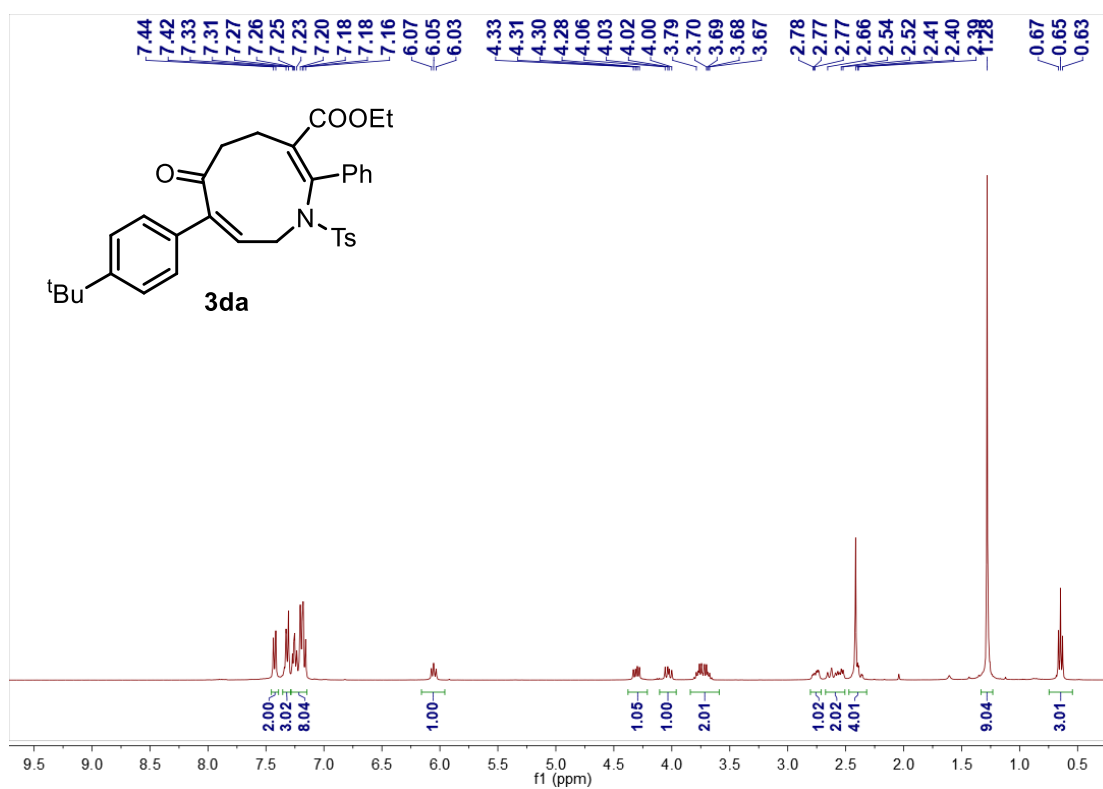

### $^{13}\text{C}$ NMR (100 MHz, $\text{CDCl}_3$ ) of **3da**

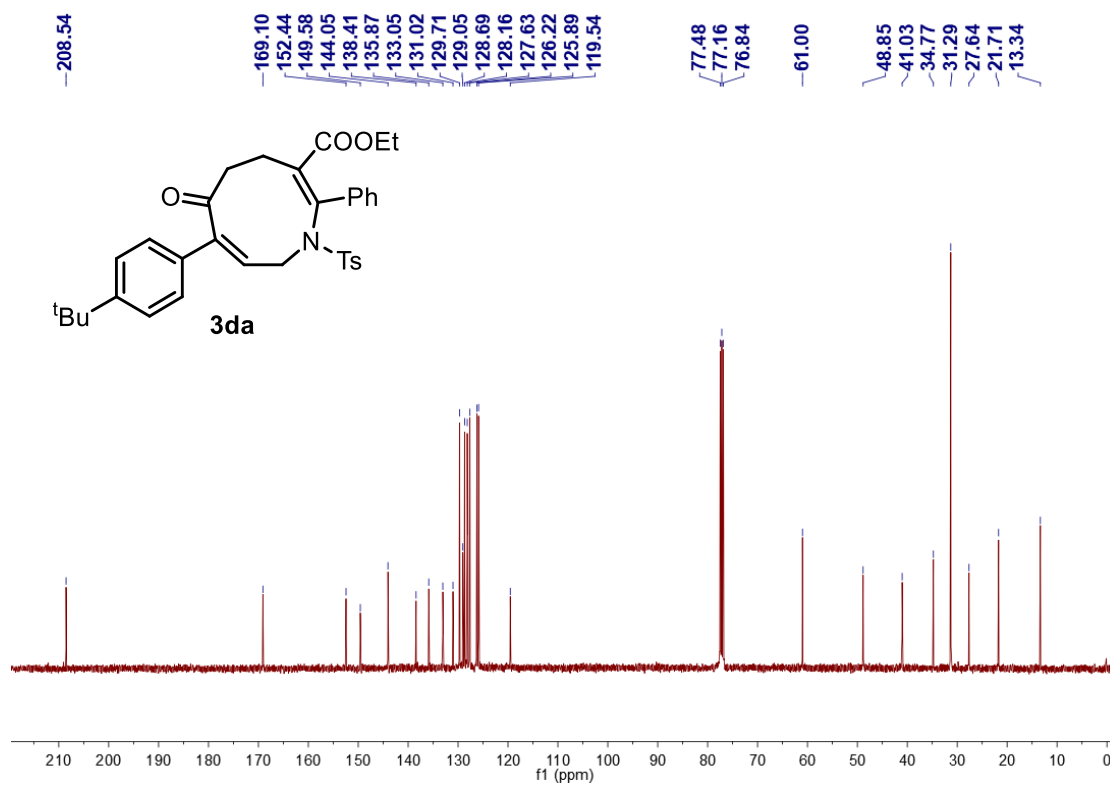

### HRMS of **3da**

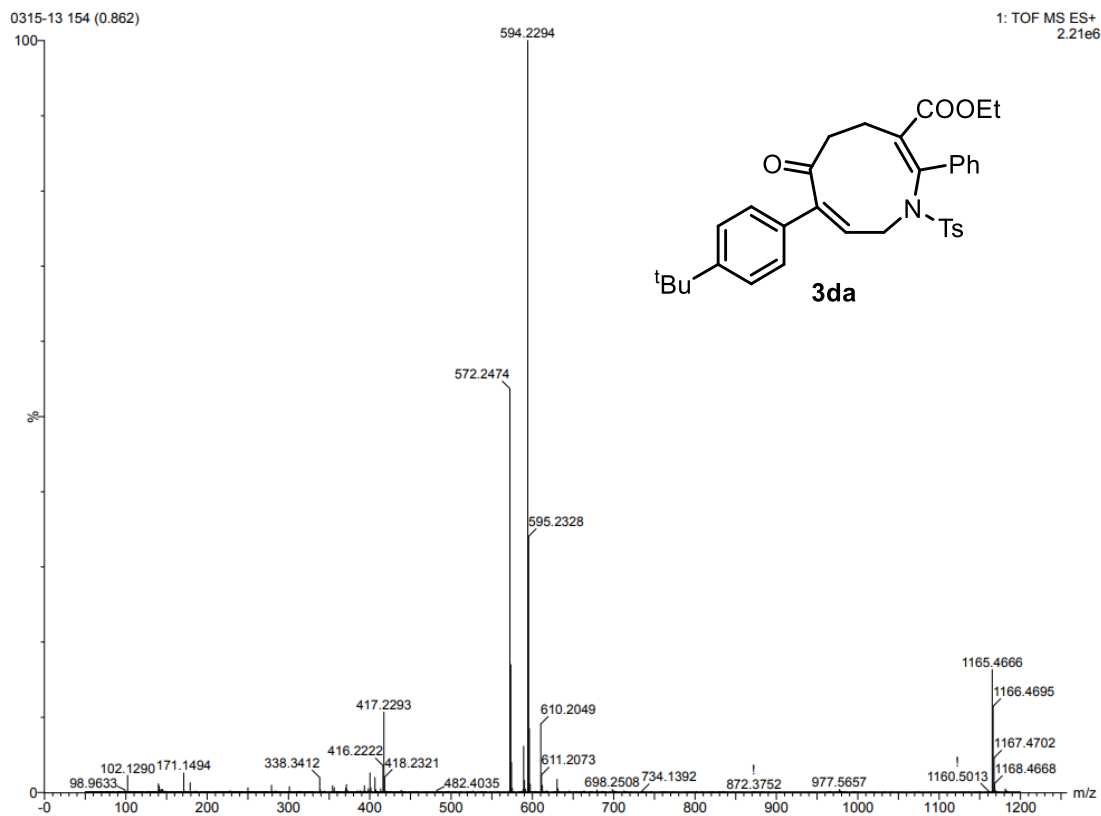

<sup>1</sup>H NMR (400 MHz, CDCl<sub>3</sub>) of **3ea**

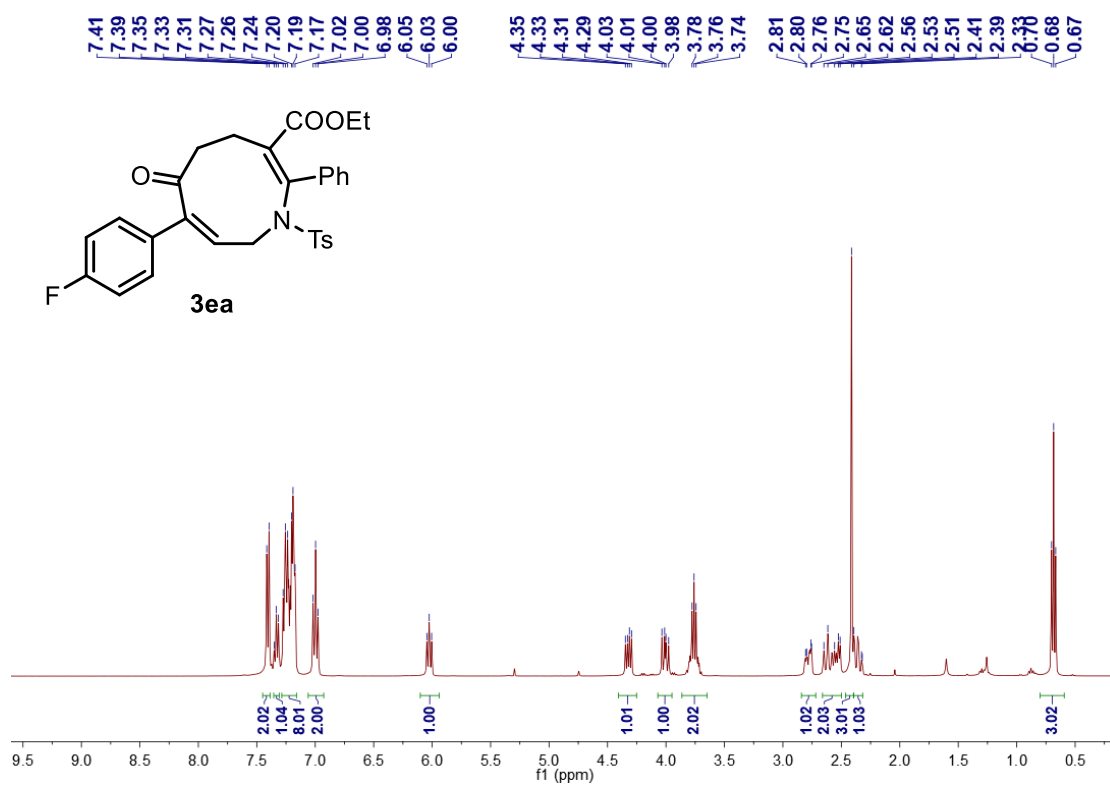

<sup>13</sup>C NMR (100 MHz, CDCl<sub>3</sub>) of **3ea**

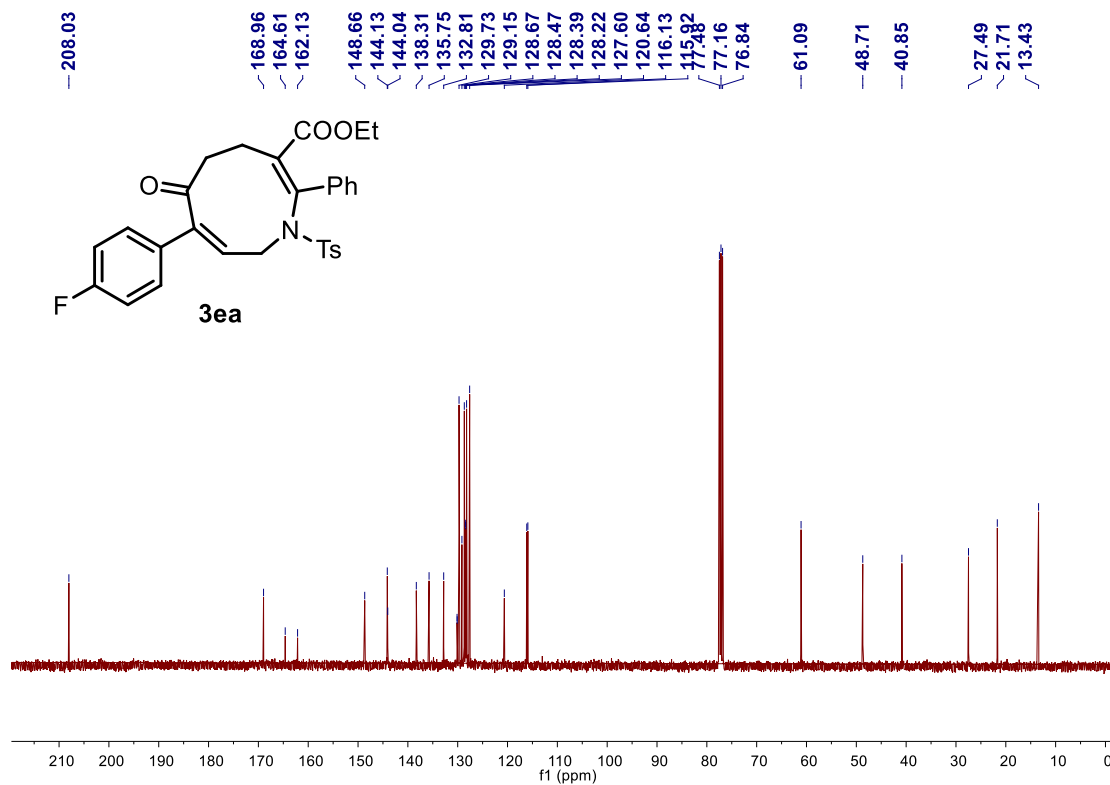



<sup>19</sup>F NMR (376 MHz, CDCl<sub>3</sub>) of **3ea**

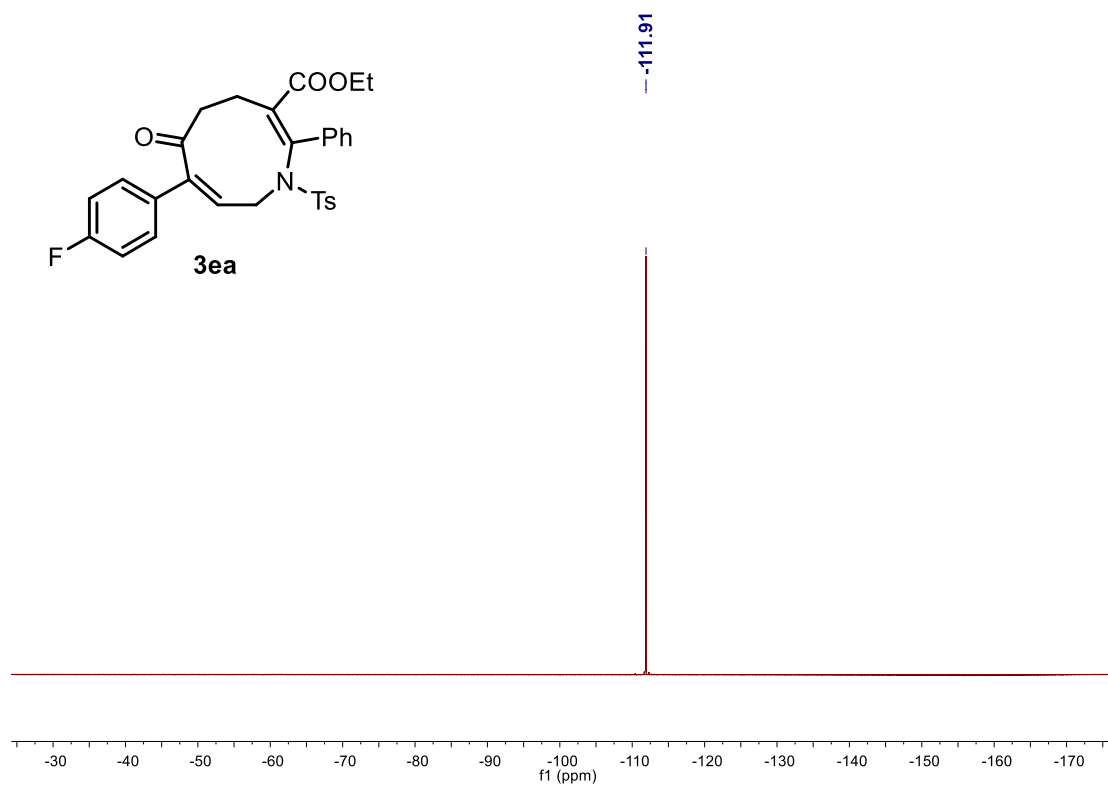

HRMS of **3ea**

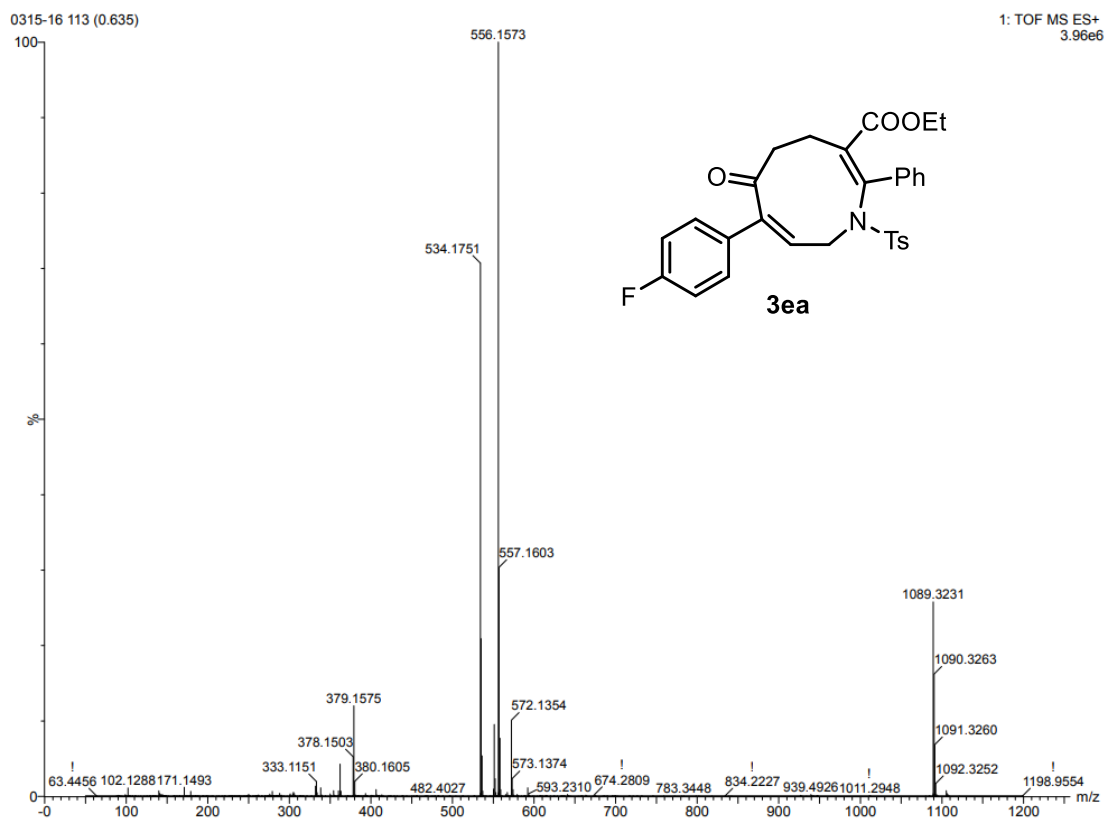

<sup>1</sup>H NMR (400 MHz, CDCl<sub>3</sub>) of **3fa**

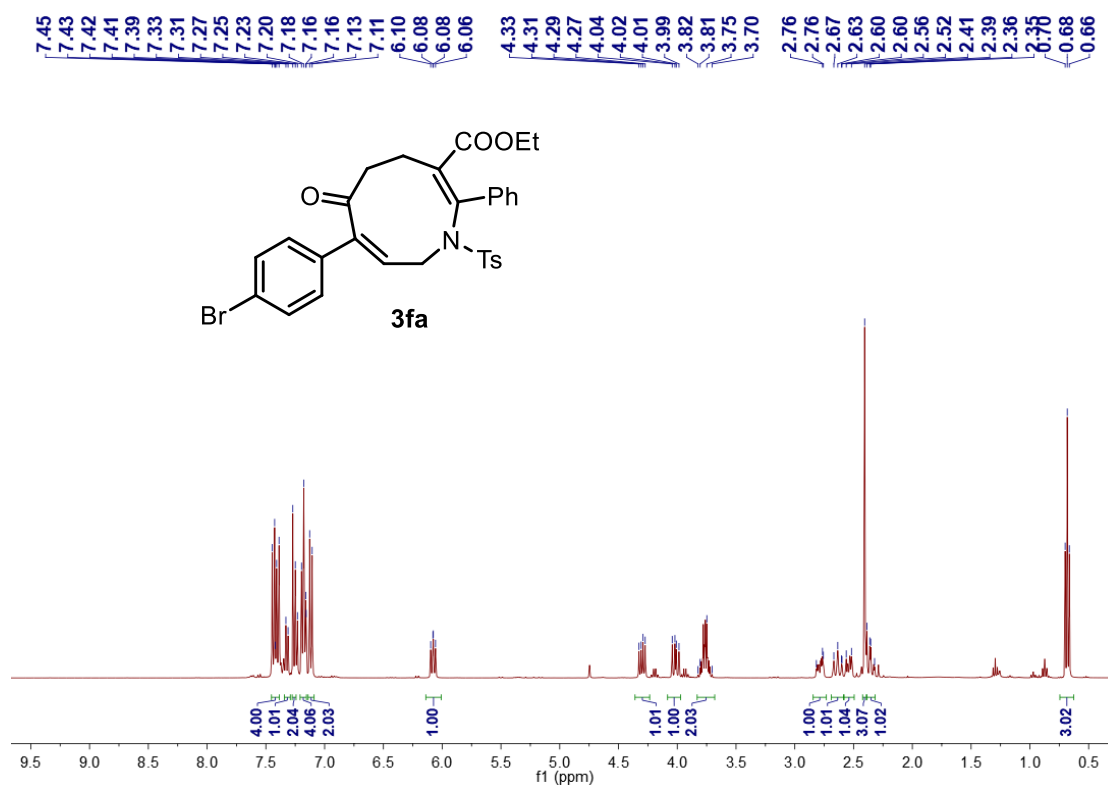

<sup>13</sup>C NMR (100 MHz, CDCl<sub>3</sub>) of **3fa**

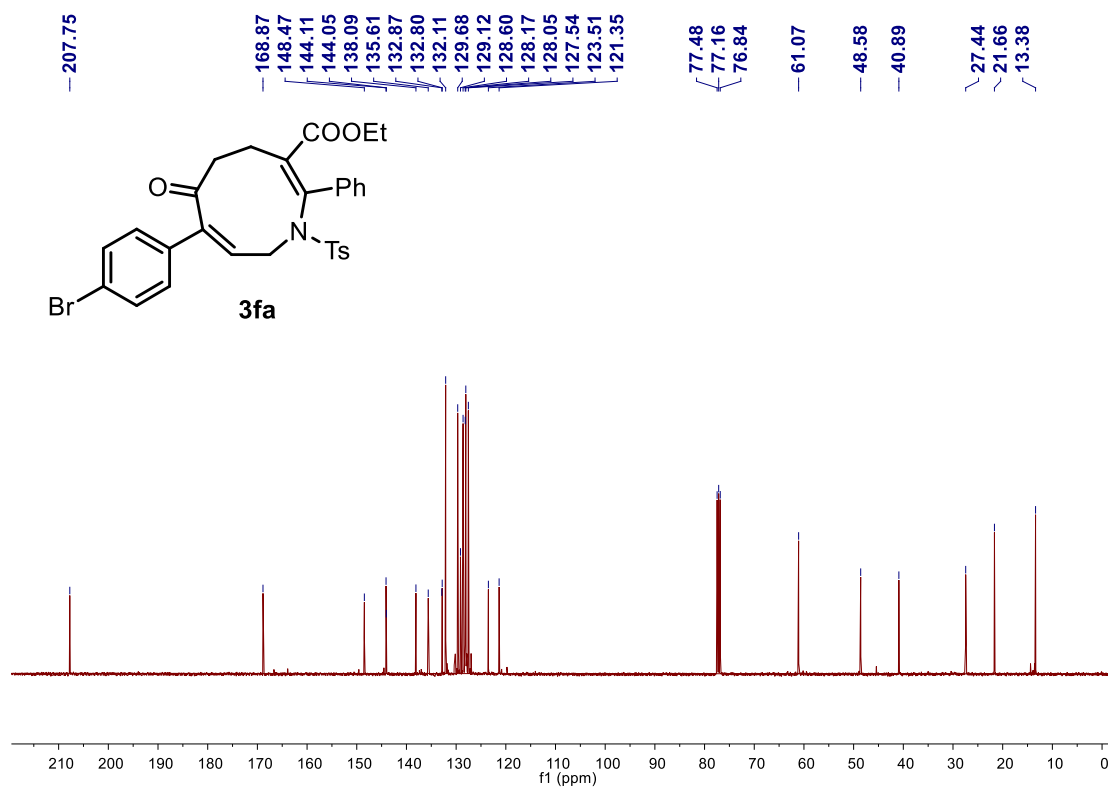

### HRMS of 3fa

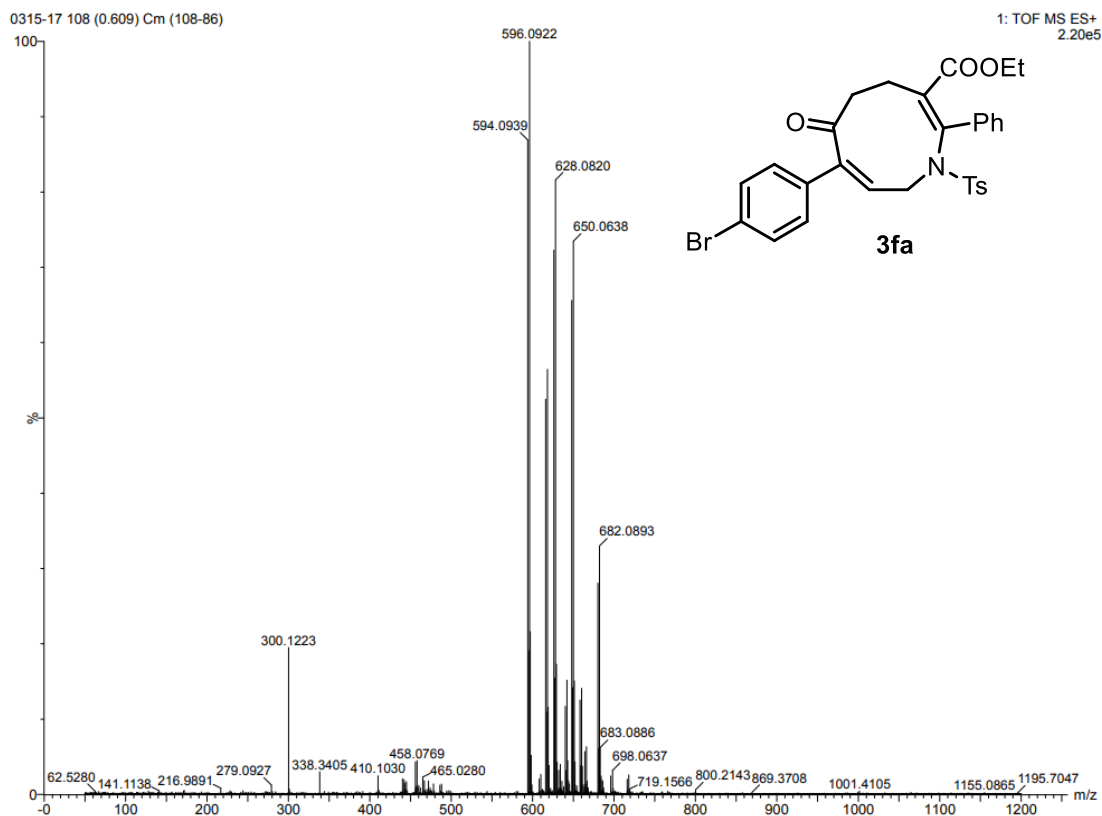

### <sup>1</sup>H NMR (400 MHz, CDCl<sub>3</sub>) of 3ga

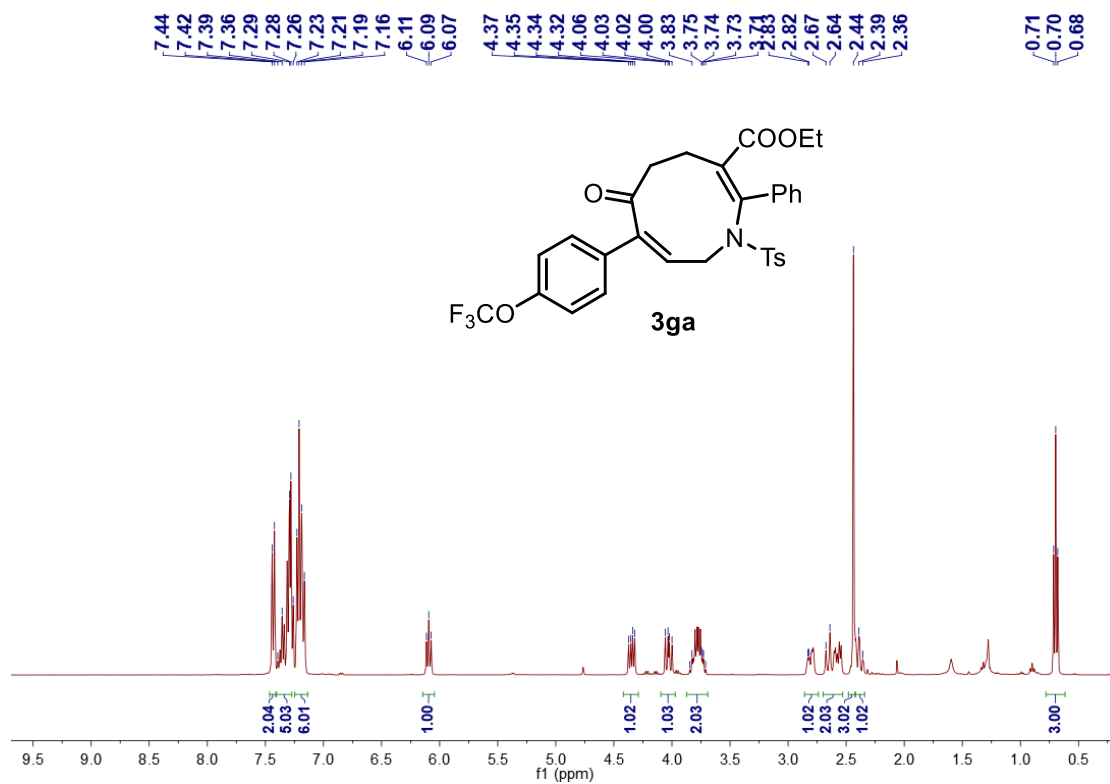

<sup>13</sup>C NMR (100 MHz, CDCl<sub>3</sub>) of **3ga**

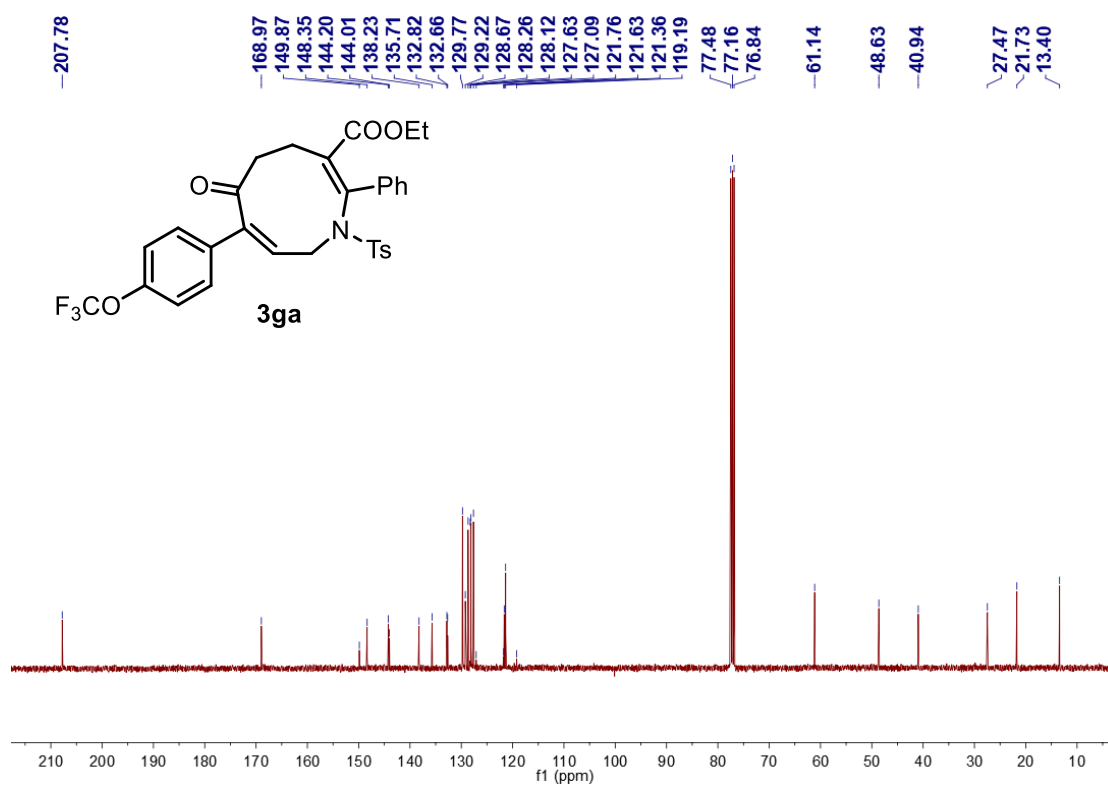

<sup>19</sup>F NMR (376 MHz, CDCl<sub>3</sub>) of **3ga**

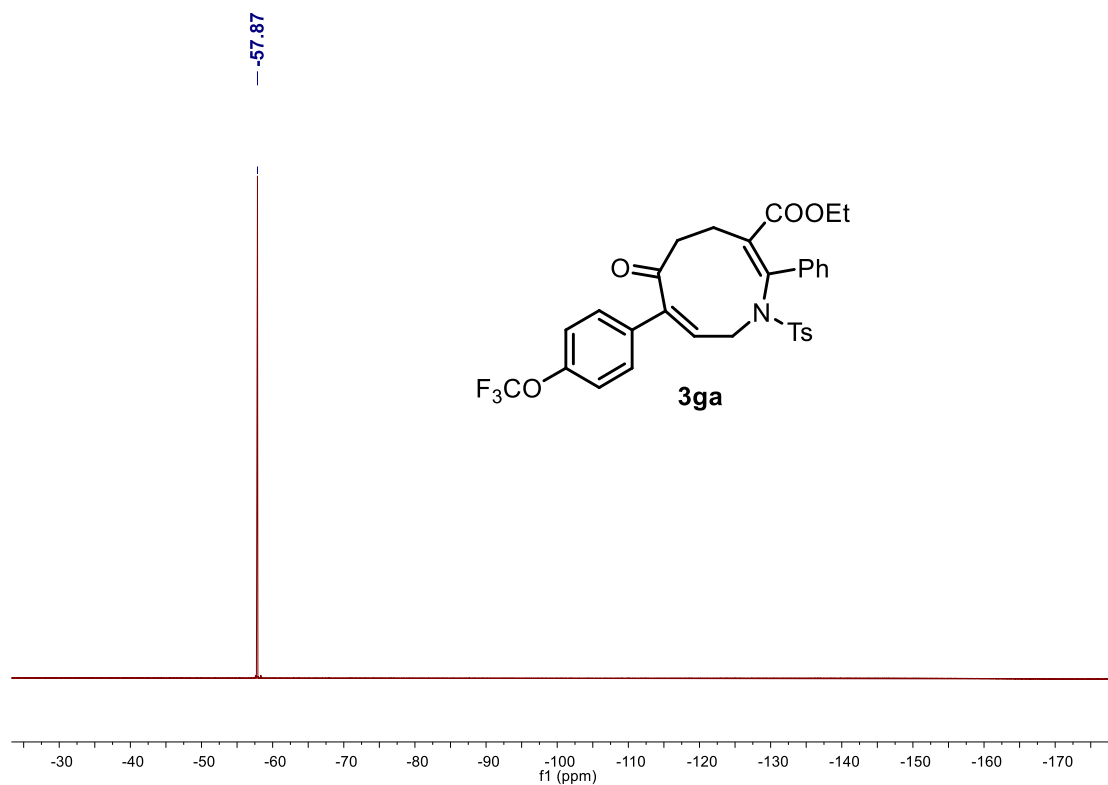

## HRMS of 3ga

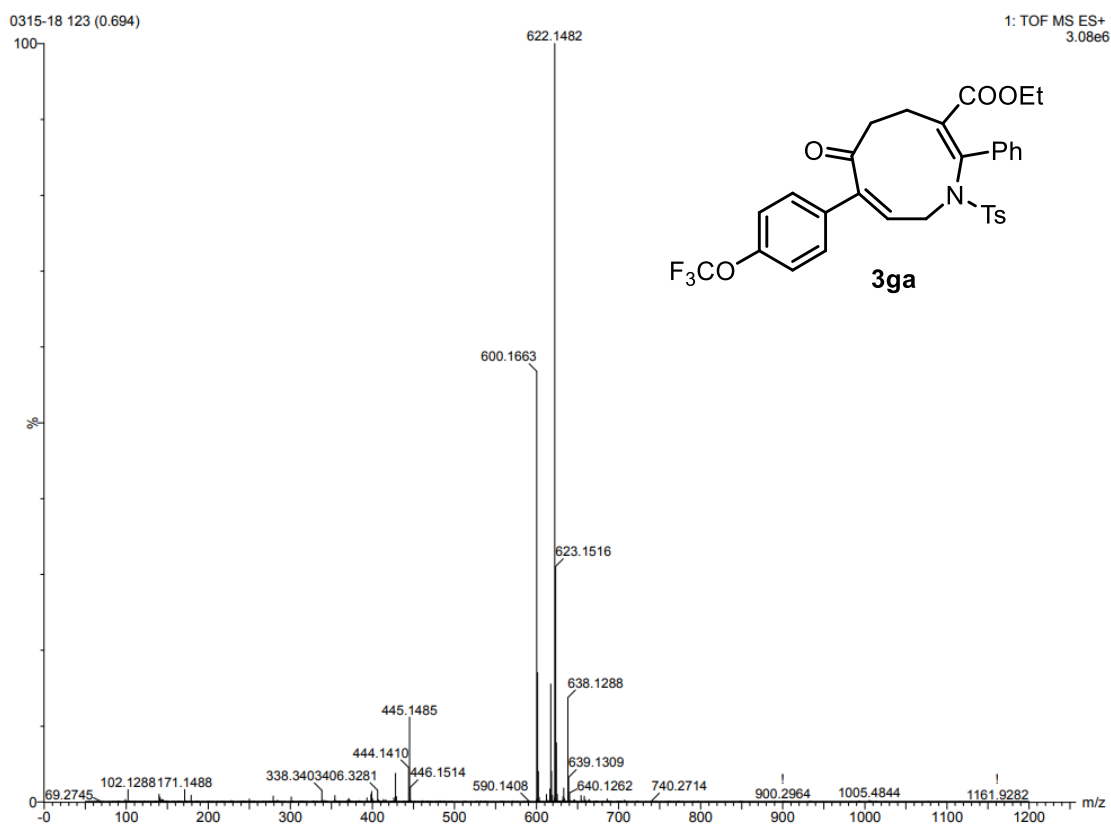

## <sup>1</sup>H NMR (400 MHz, CDCl<sub>3</sub>) of 3ha

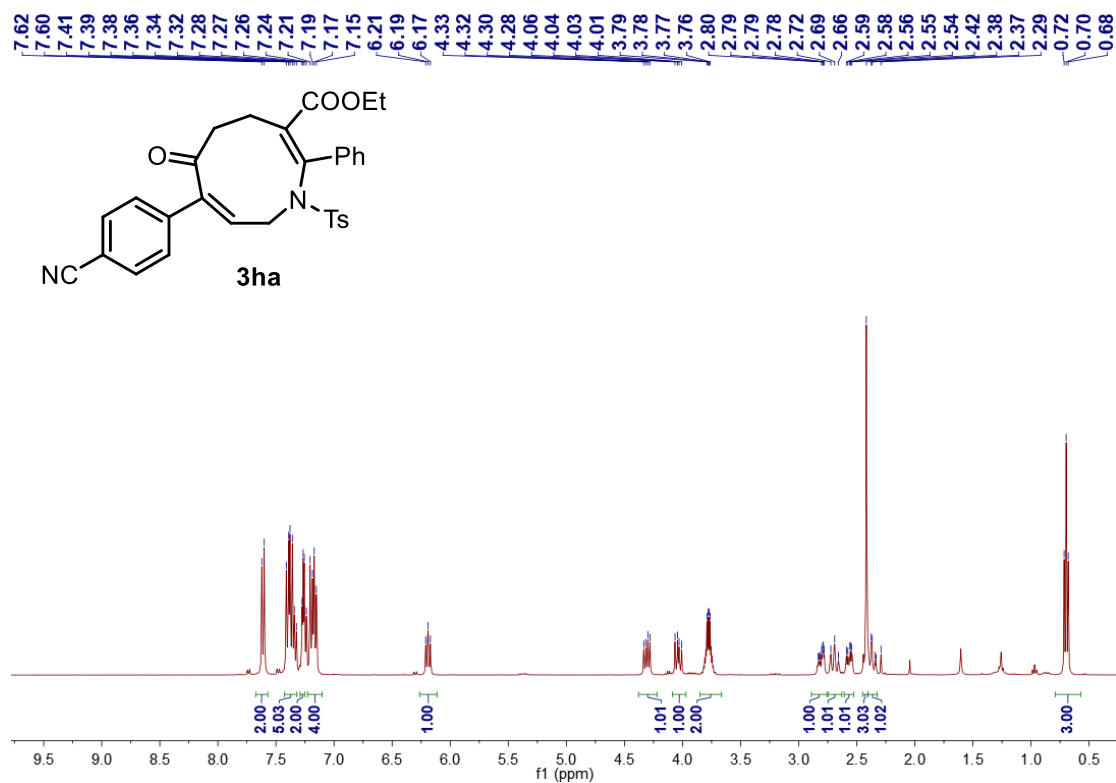

### $^{13}\text{C}$ NMR (100 MHz, $\text{CDCl}_3$ ) of **3ha**

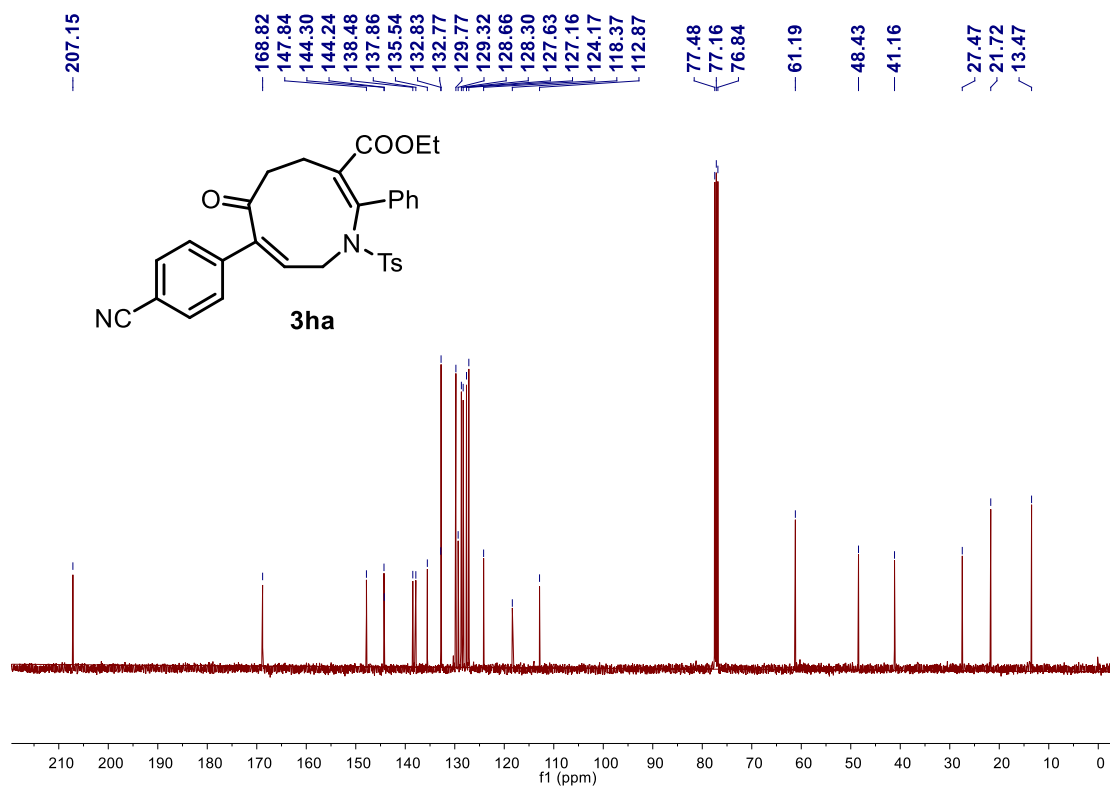

### HRMS of **3ha**

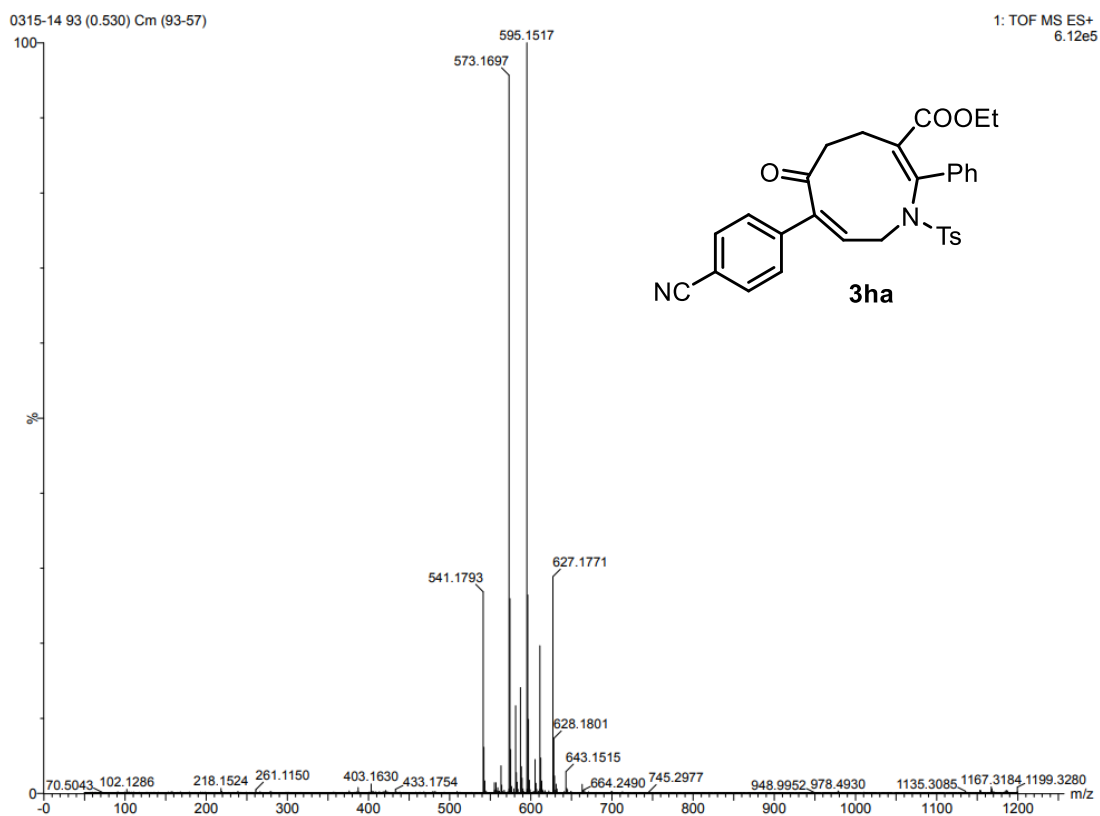

<sup>1</sup>H NMR (400 MHz, CDCl<sub>3</sub>) of **3ia**

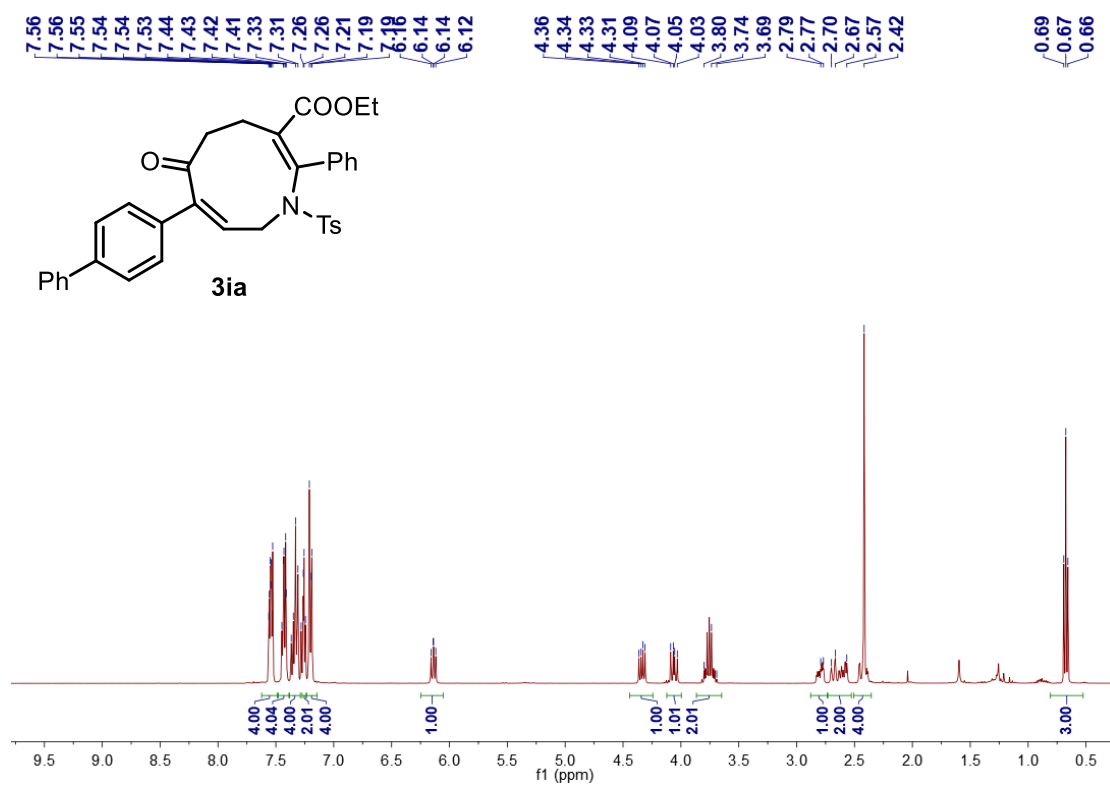

<sup>13</sup>C NMR (100 MHz, CDCl<sub>3</sub>) of **3ia**

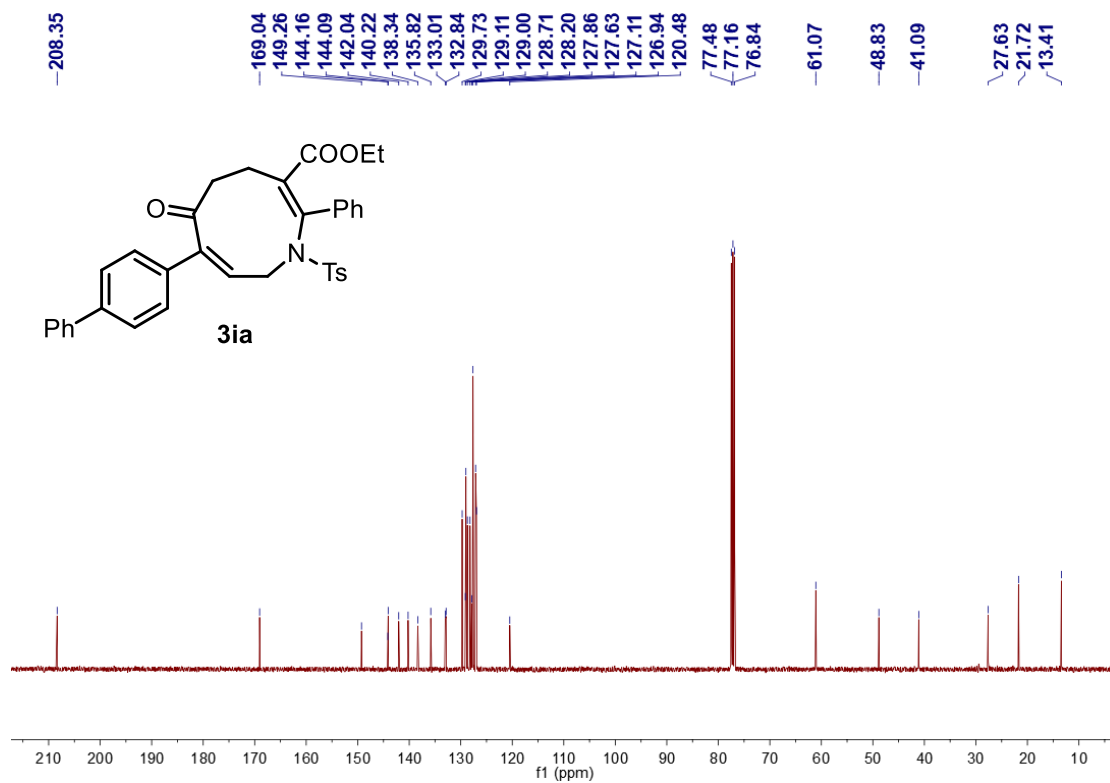

## HRMS of 3ia

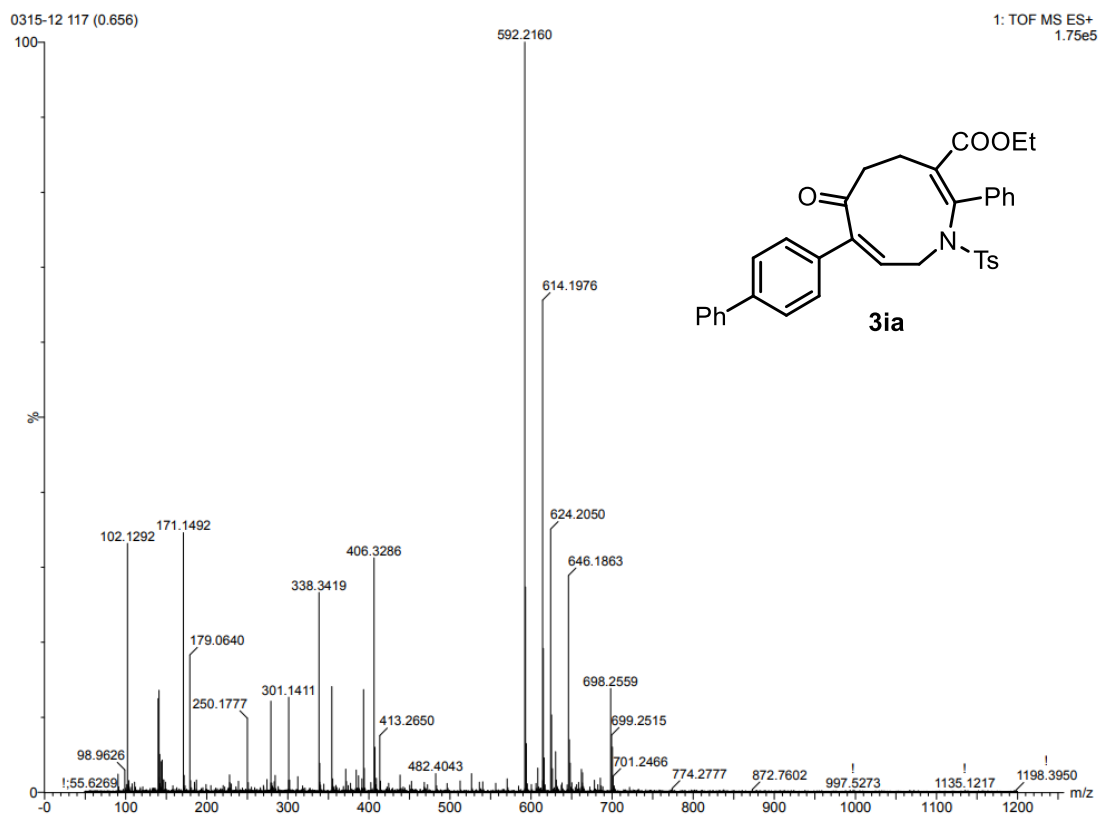

## <sup>1</sup>H NMR (400 MHz, CDCl<sub>3</sub>) of 3ja

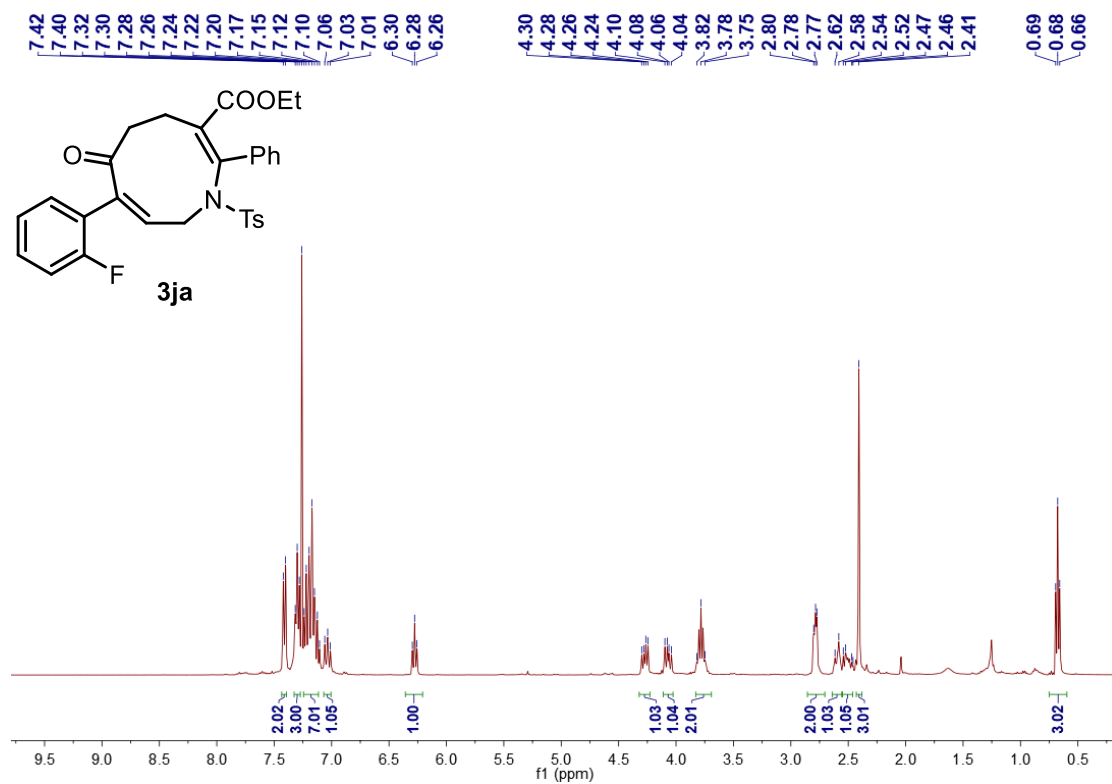



<sup>13</sup>C NMR (100 MHz, CDCl<sub>3</sub>) of **3ja**

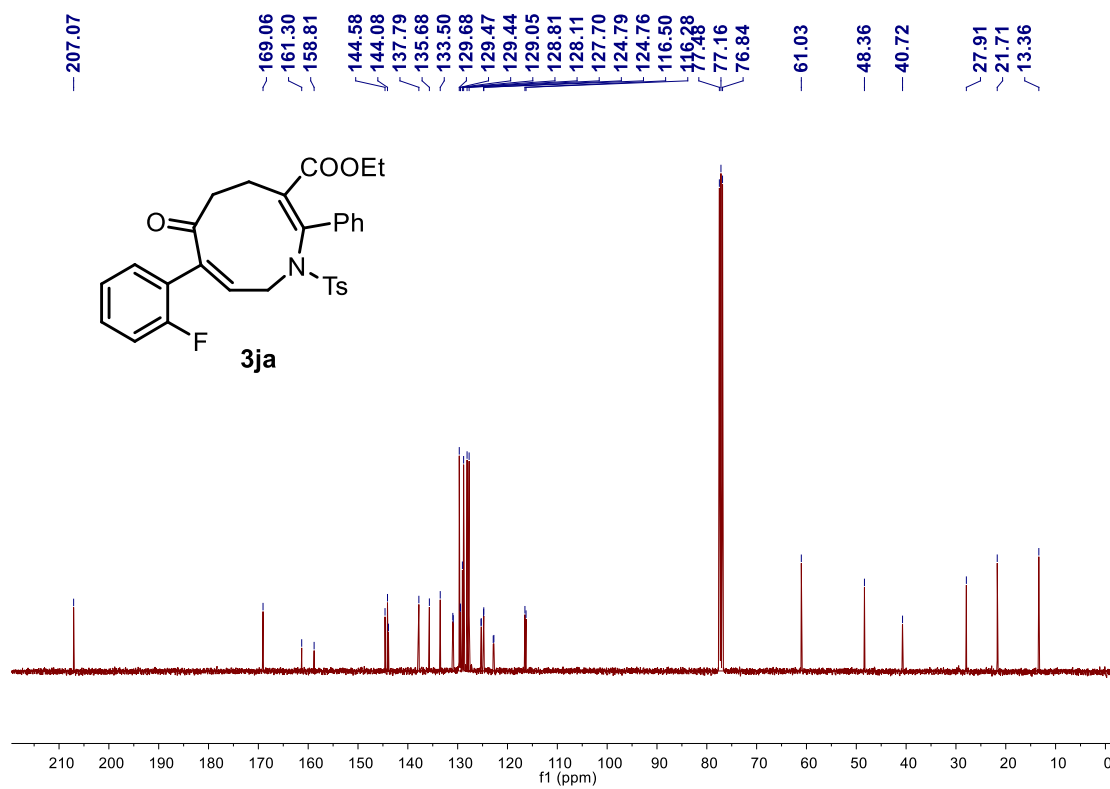

<sup>19</sup>F NMR (376 MHz, CDCl<sub>3</sub>) of **3ja**

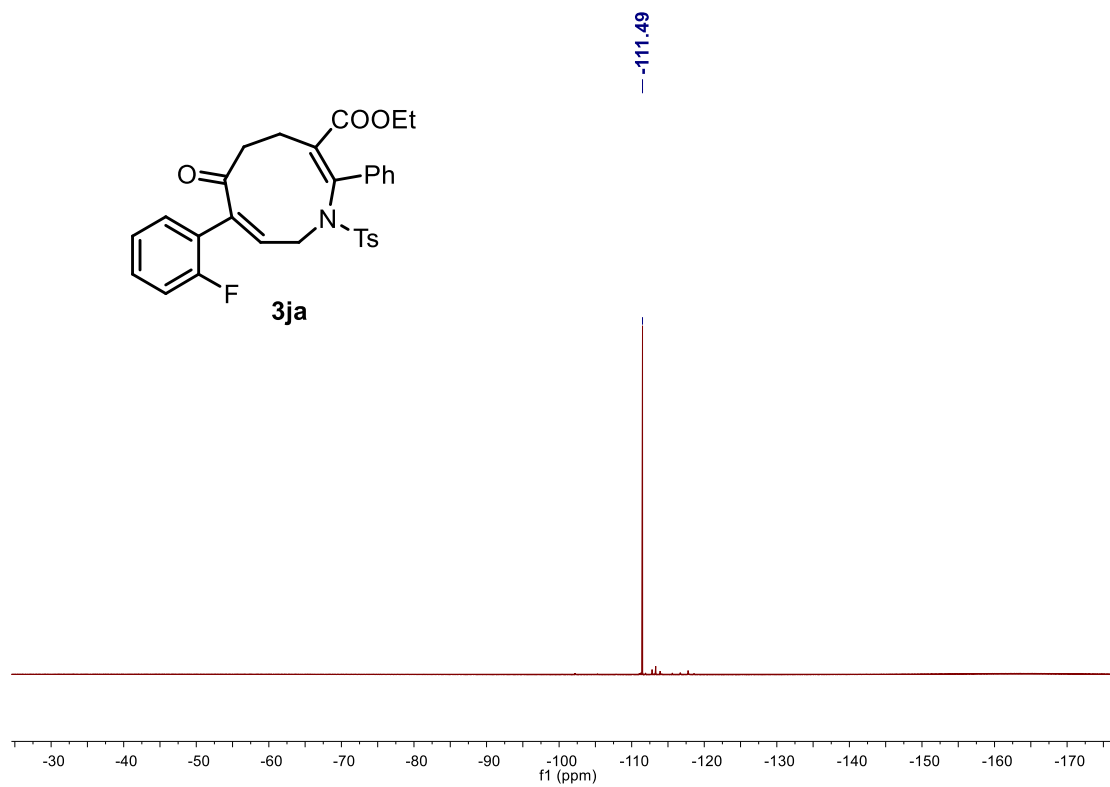

## HRMS of 3ja

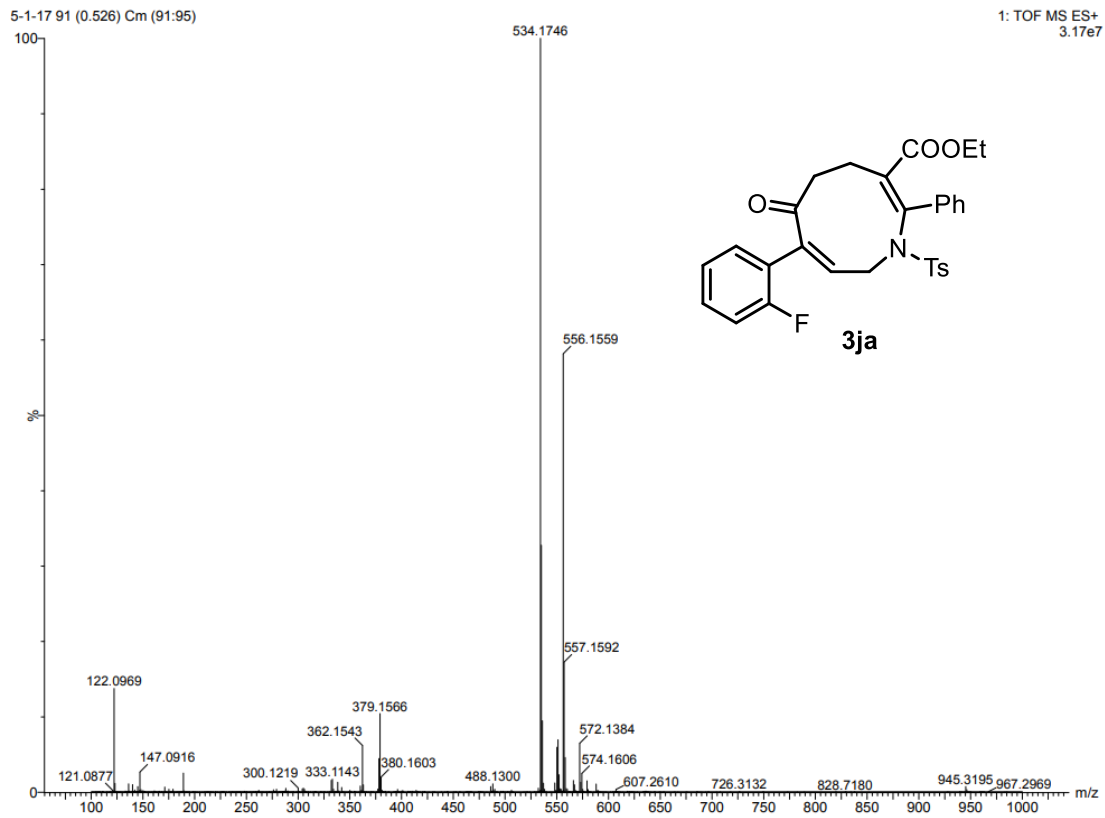

## <sup>1</sup>H NMR (400 MHz, CDCl<sub>3</sub>) of 3ka

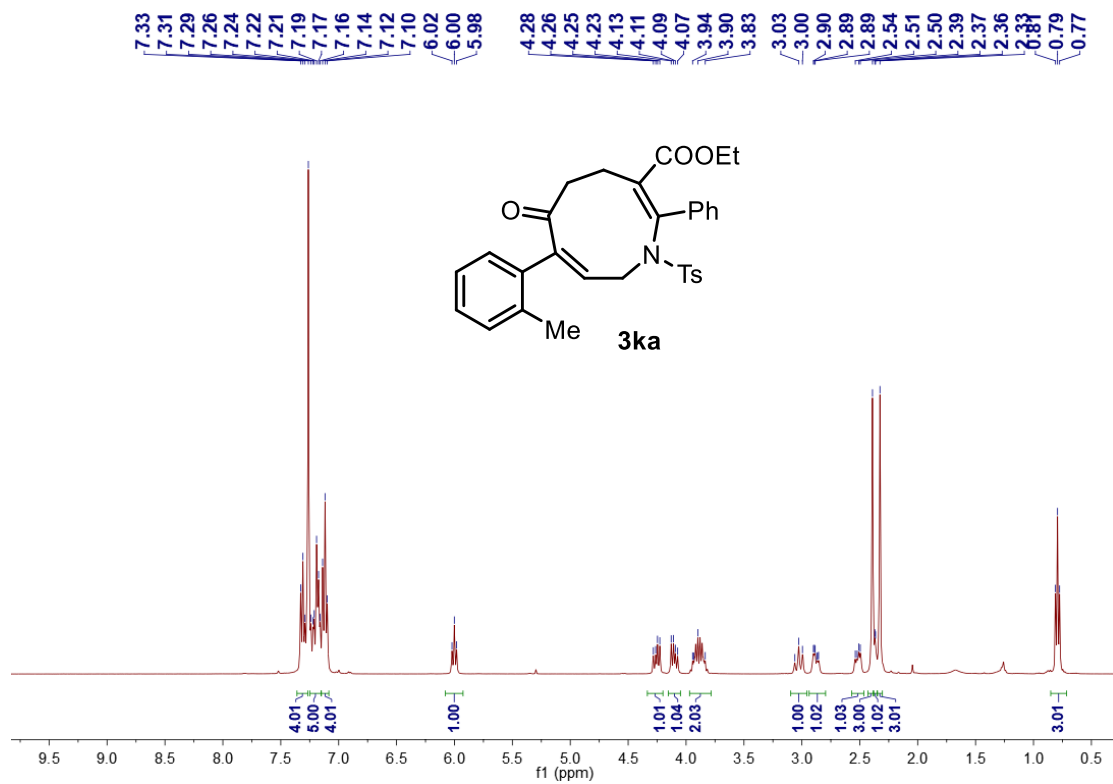

<sup>13</sup>C NMR (100 MHz, CDCl<sub>3</sub>) of **3ka**

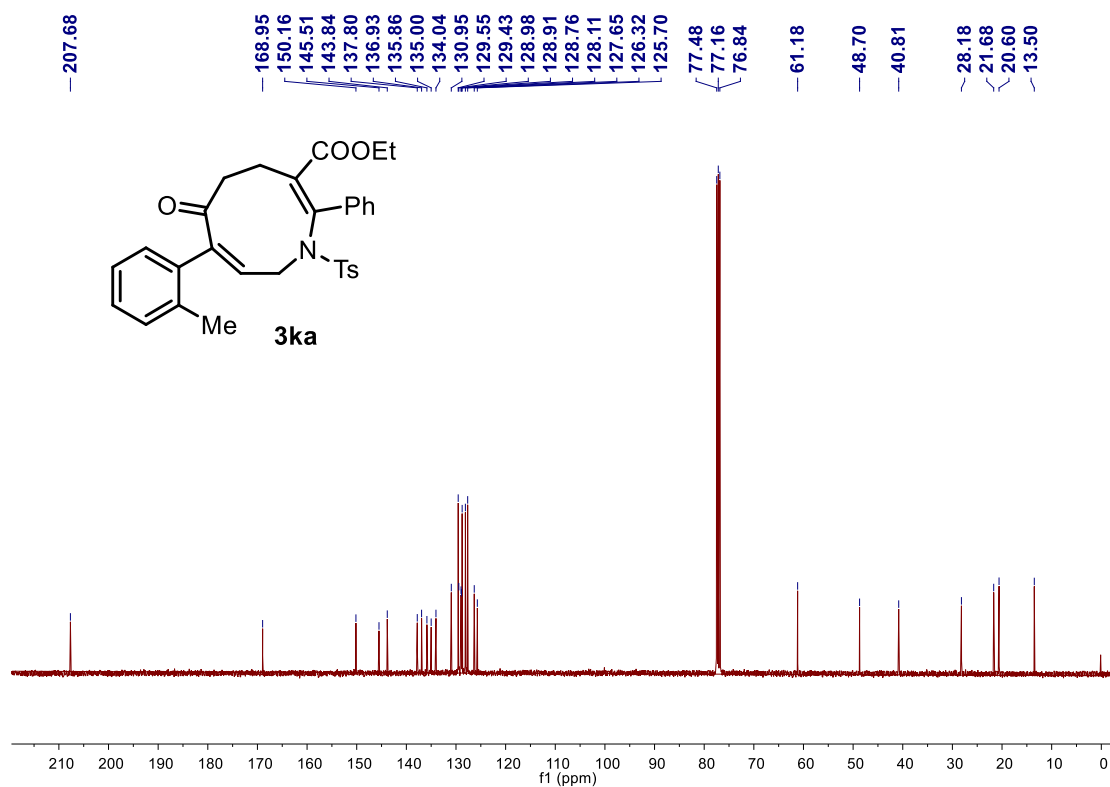

HRMS of **3ka**

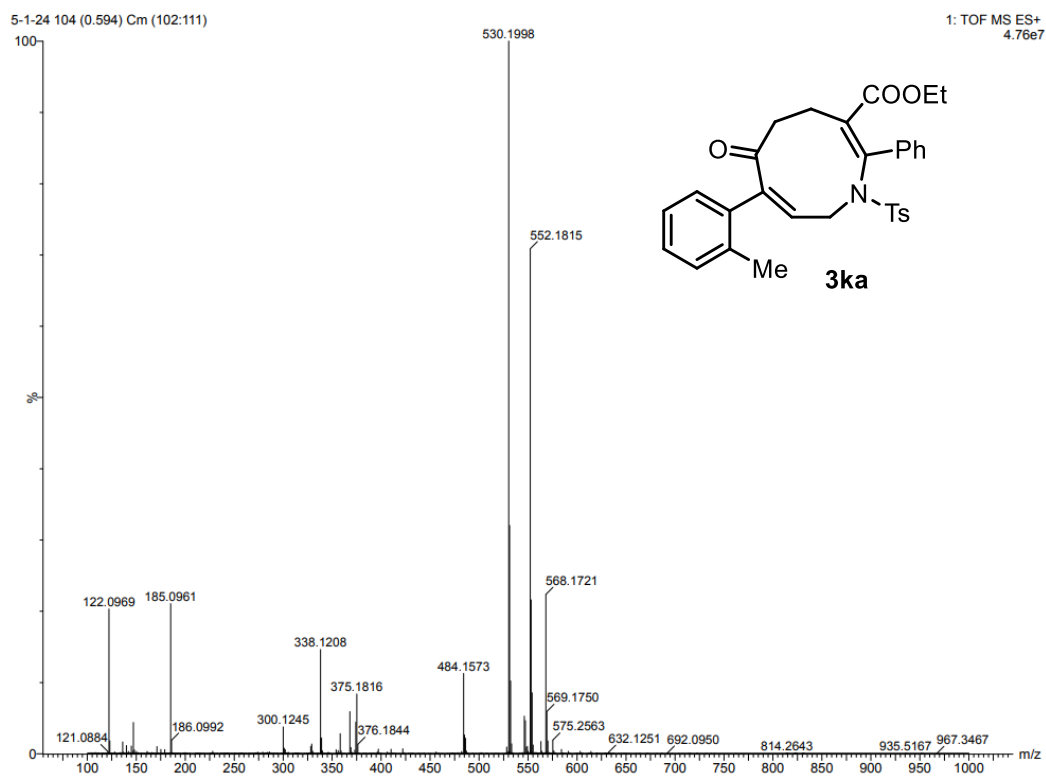

<sup>1</sup>H NMR (400 MHz, CDCl<sub>3</sub>) of **3la**

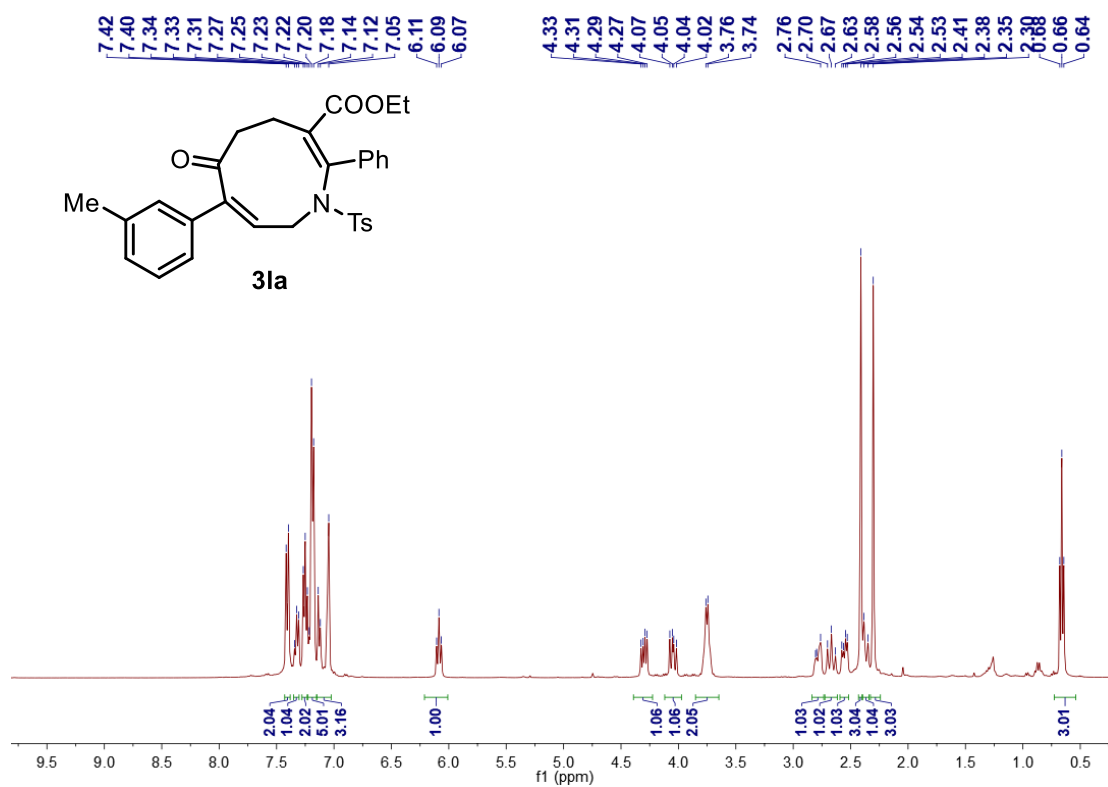

<sup>13</sup>C NMR (100 MHz, CDCl<sub>3</sub>) of **3la**

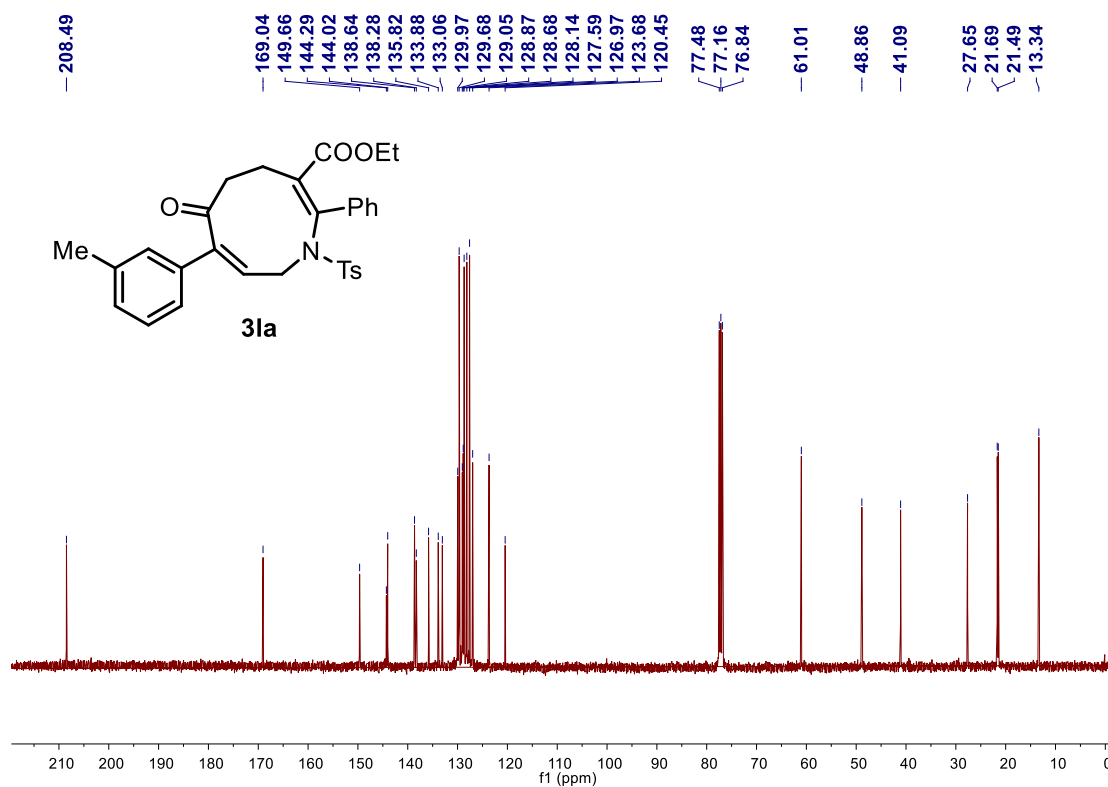

## HRMS of 3la

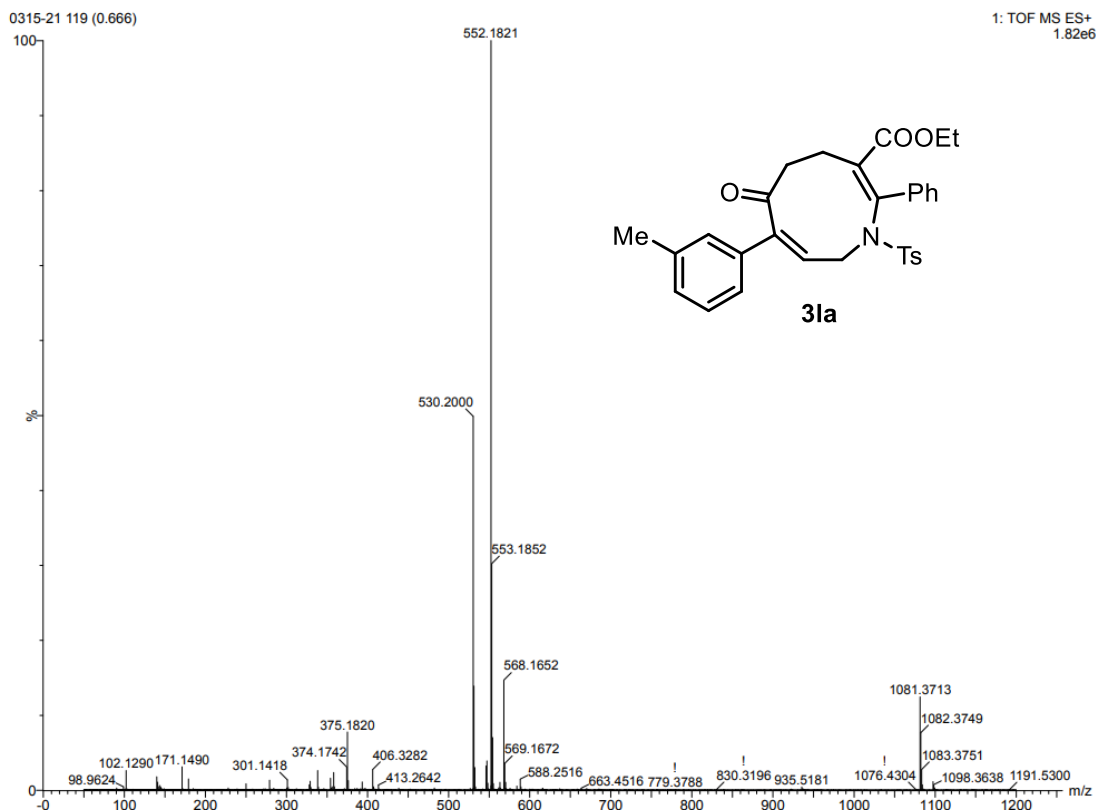

## <sup>1</sup>H NMR (400 MHz, CDCl<sub>3</sub>) of 3ma

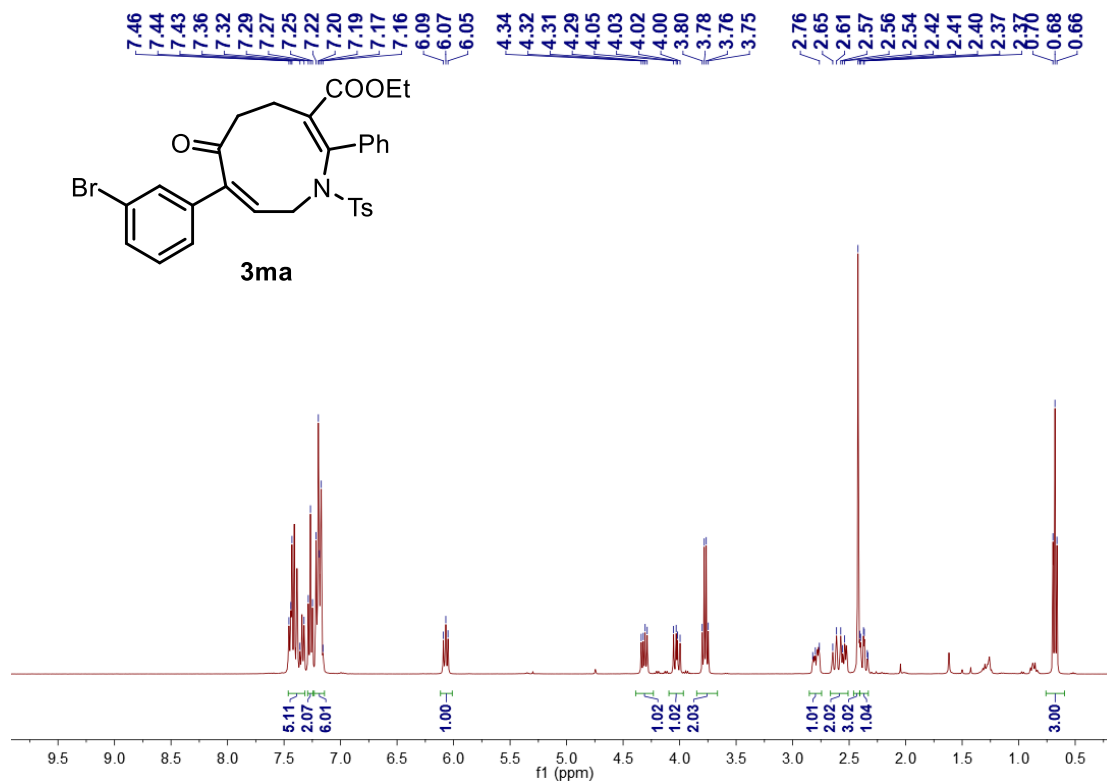

<sup>13</sup>C NMR (100 MHz, CDCl<sub>3</sub>) of **3ma**

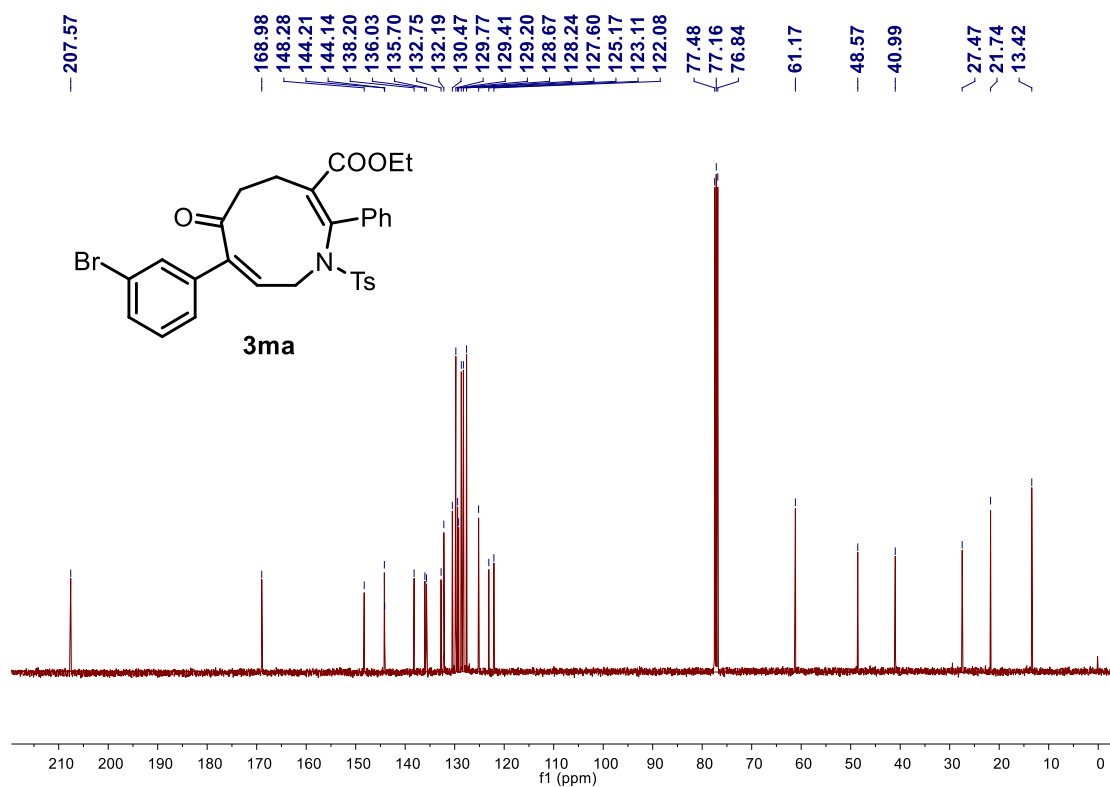

HRMS of **3ma**

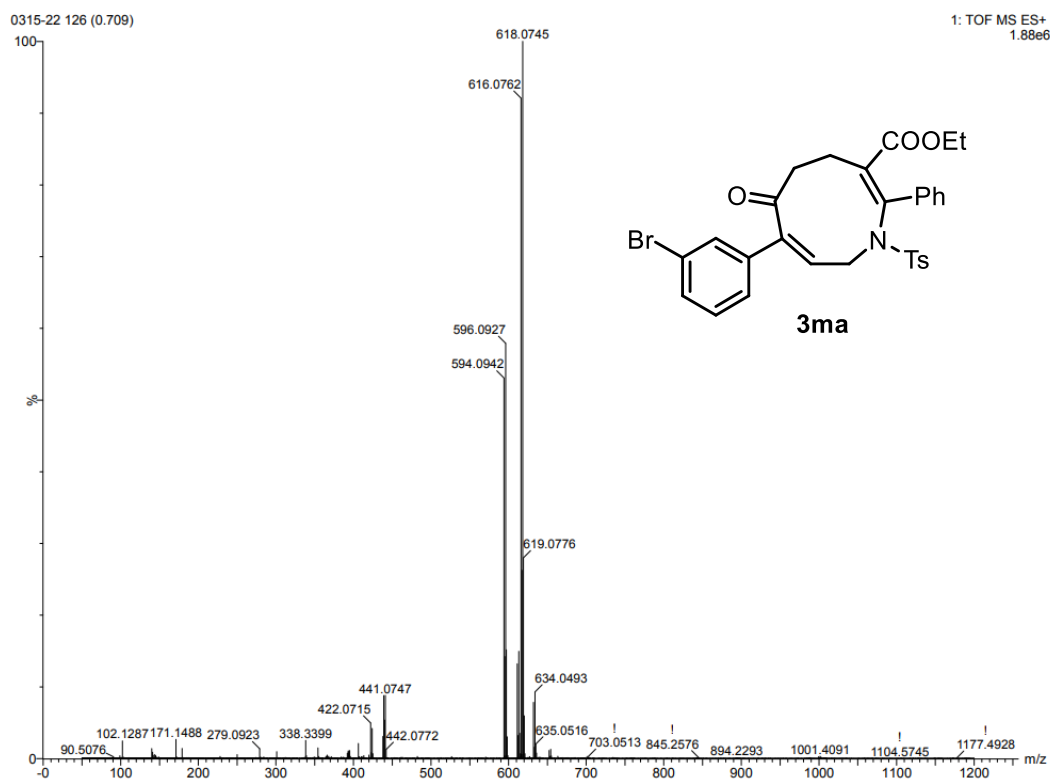

<sup>1</sup>H NMR (400 MHz, CDCl<sub>3</sub>) of **3na**

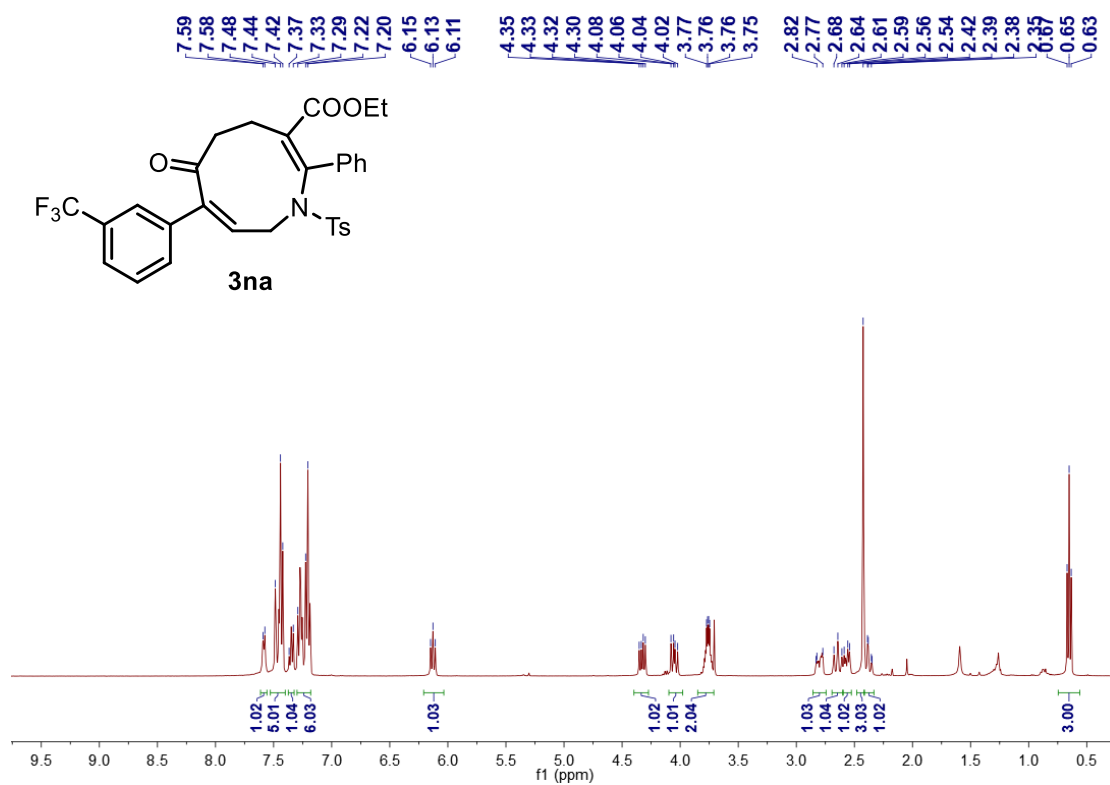

<sup>13</sup>C NMR (100 MHz, CDCl<sub>3</sub>) of **3na**

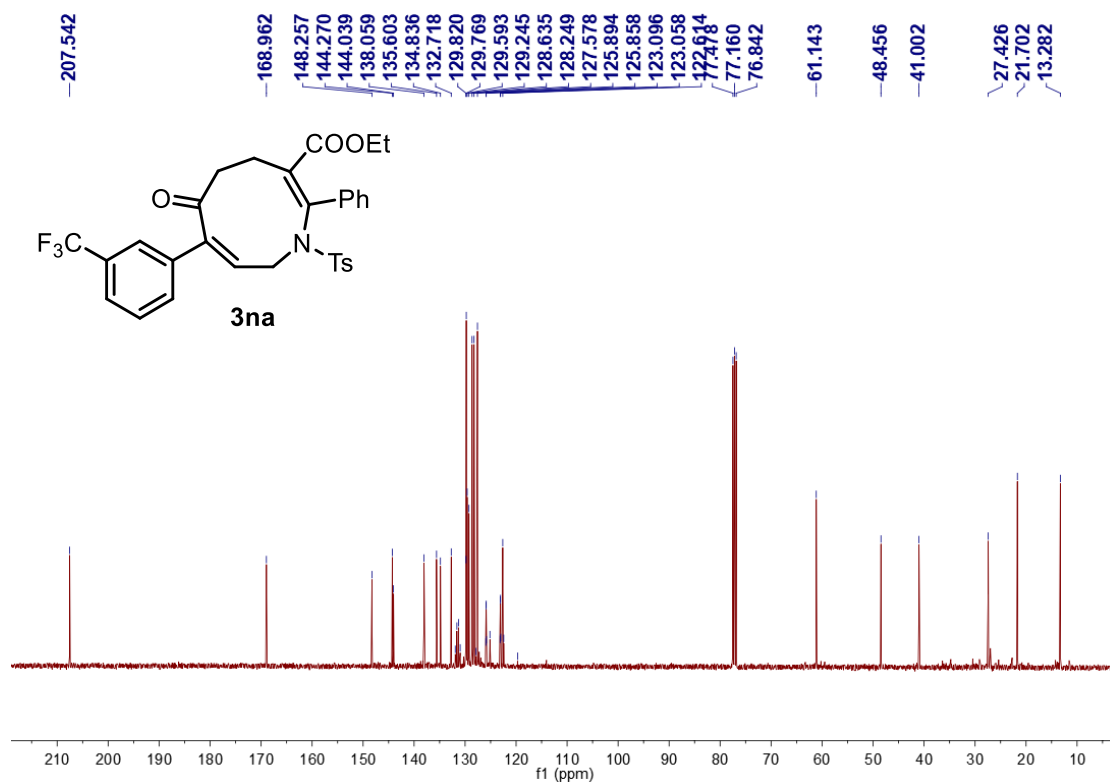

$^{19}\text{F}$  NMR (376 MHz,  $\text{CDCl}_3$ ) of **3na**

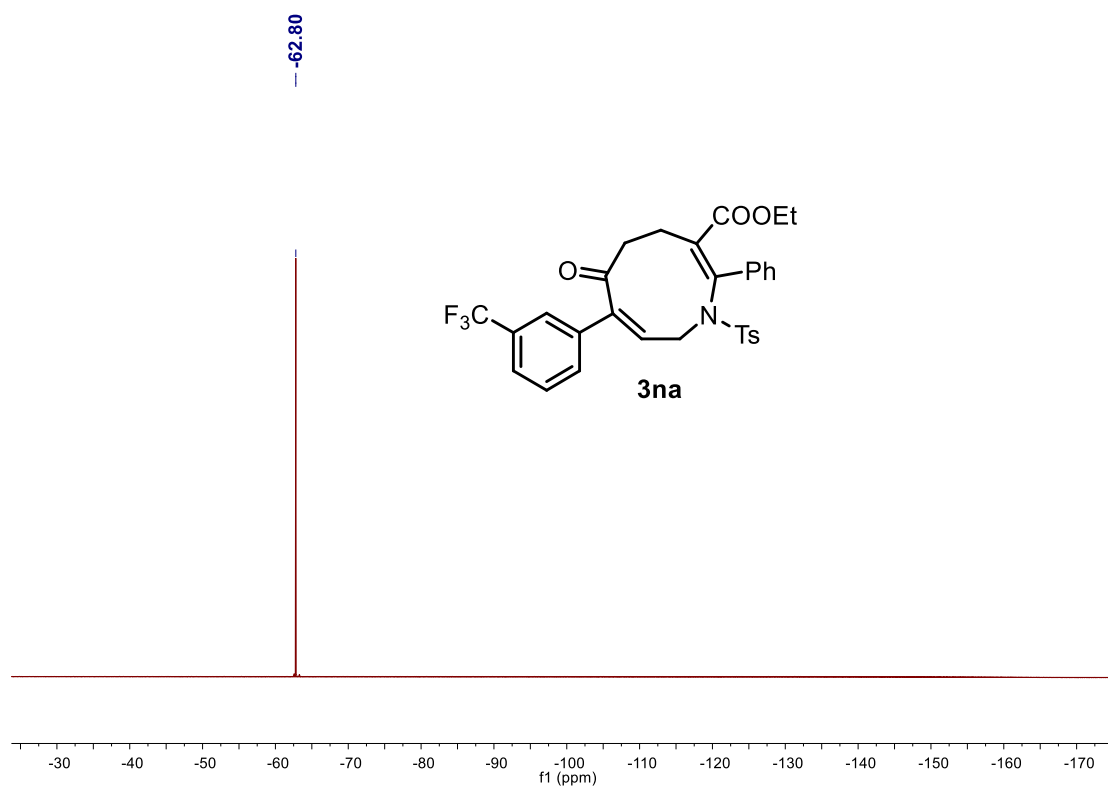

HRMS of **3na**

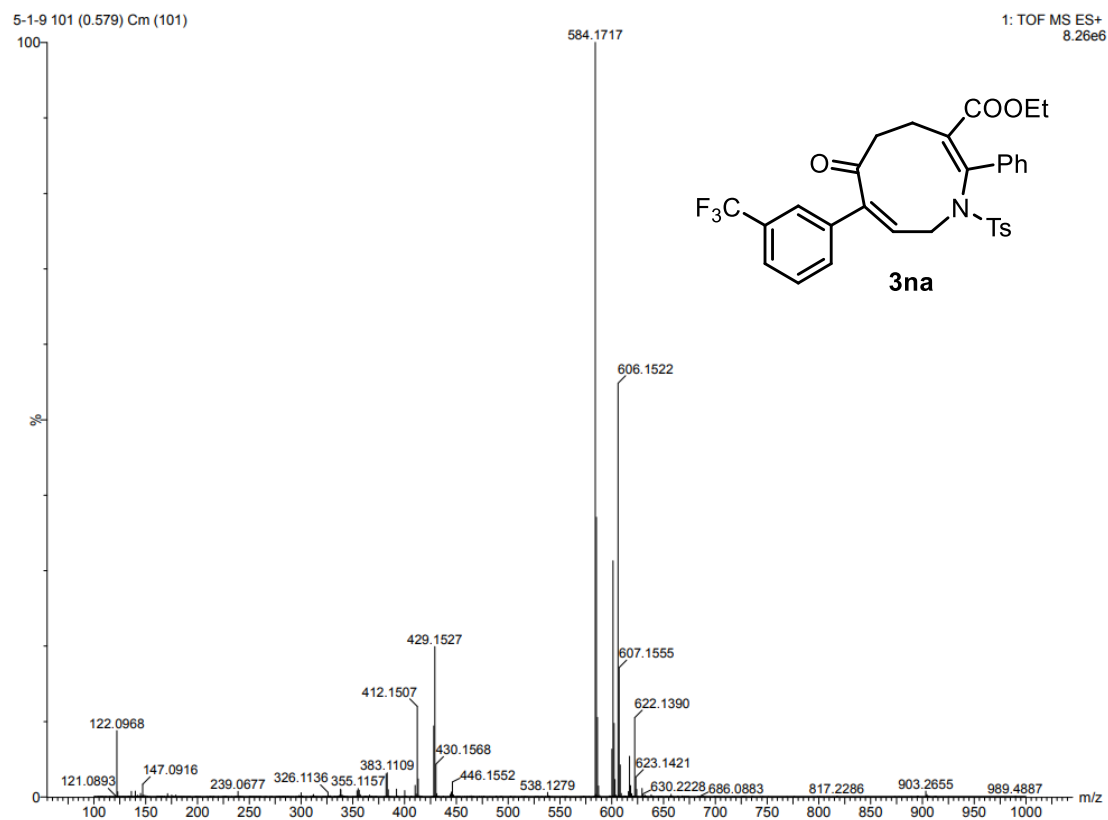



<sup>1</sup>H NMR (400 MHz, CDCl<sub>3</sub>) of **3oa**

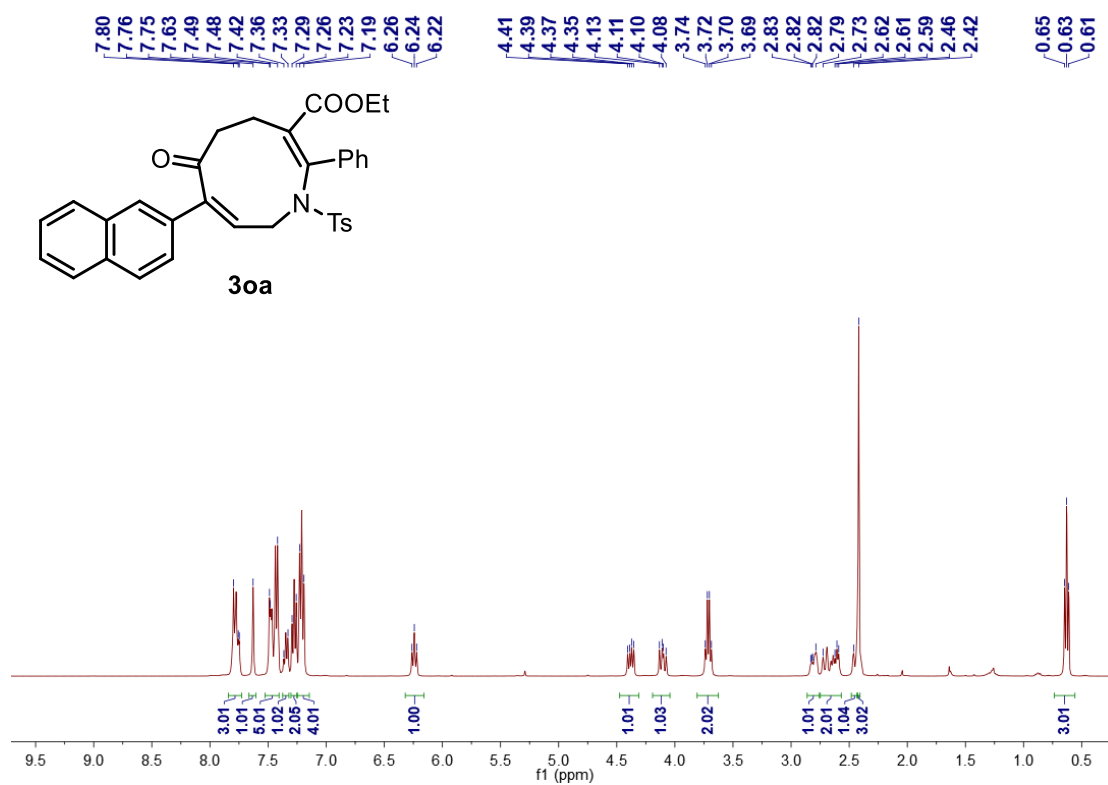

<sup>13</sup>C NMR (100 MHz, CDCl<sub>3</sub>) of **3oa**

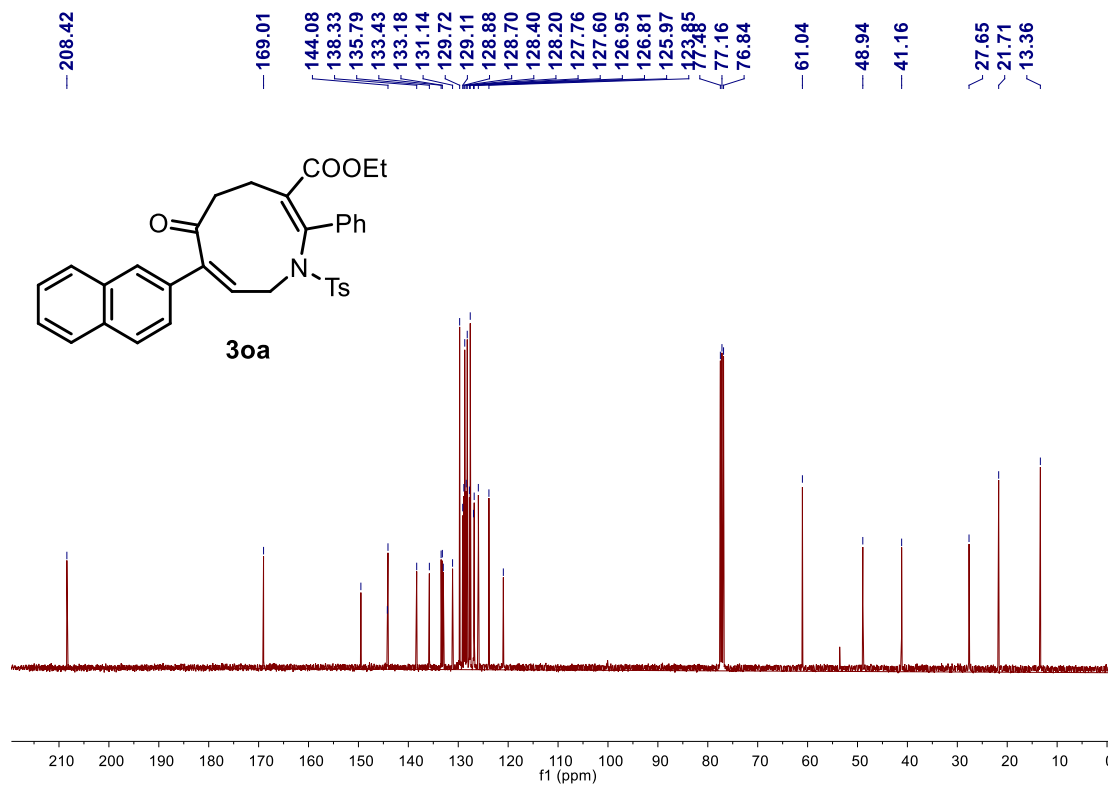

### HRMS of 3a

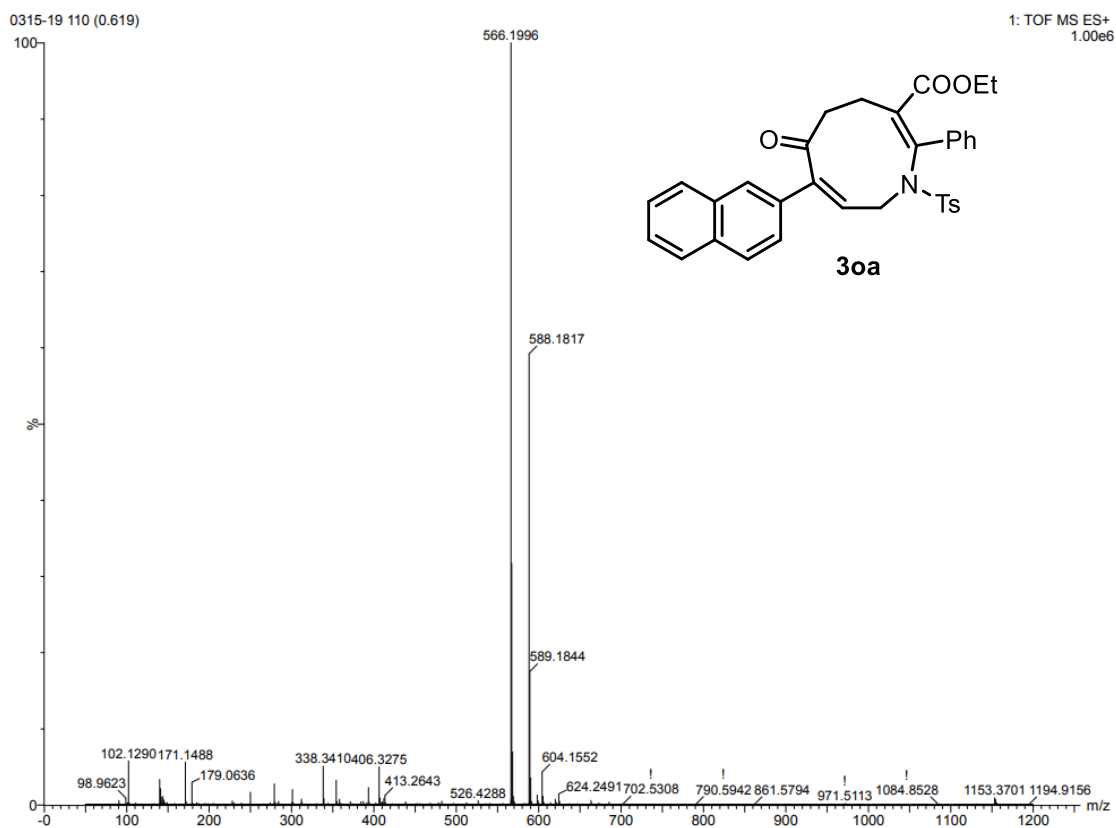

### <sup>1</sup>H NMR (400 MHz, CDCl<sub>3</sub>) of 3ab

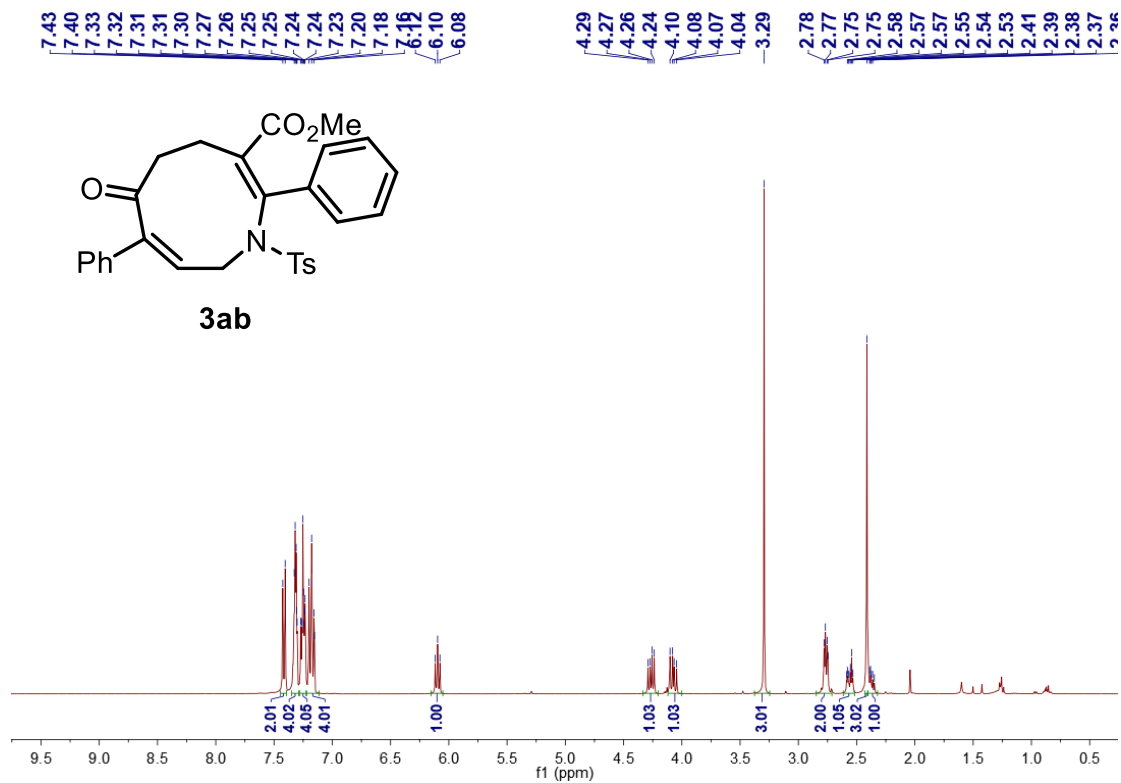

<sup>13</sup>C NMR (100 MHz, CDCl<sub>3</sub>) of **3ab**

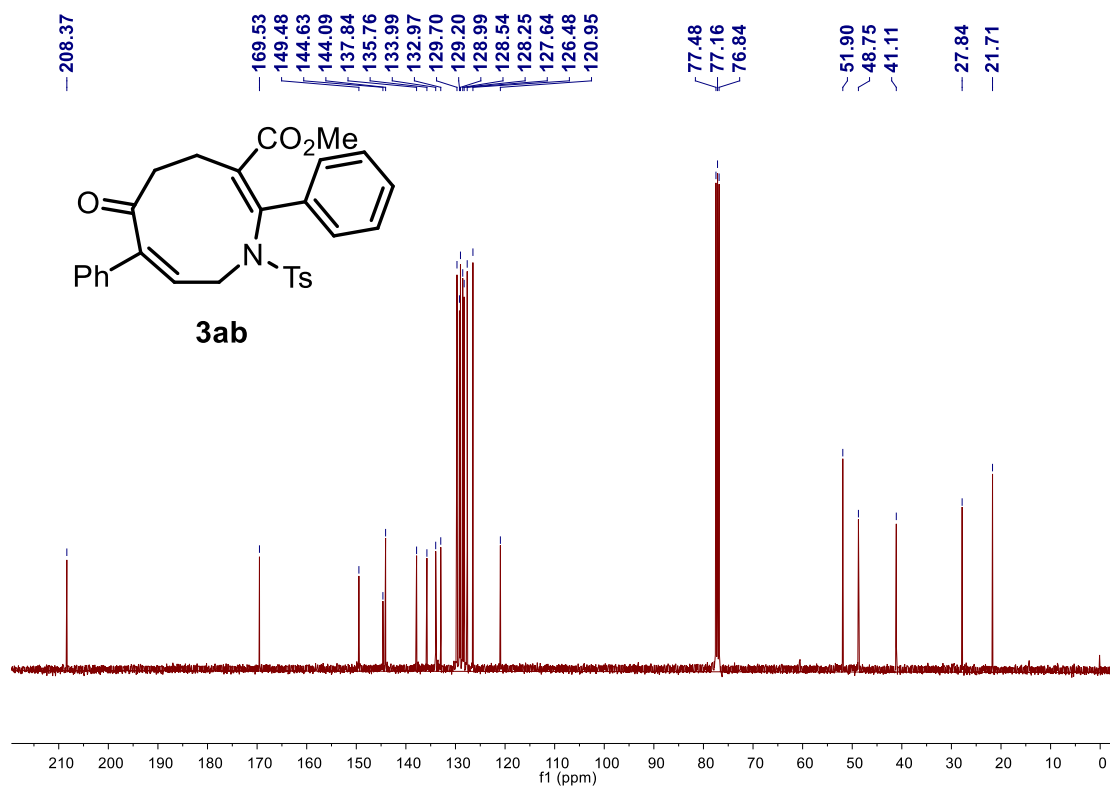

HRMS of **3ab**

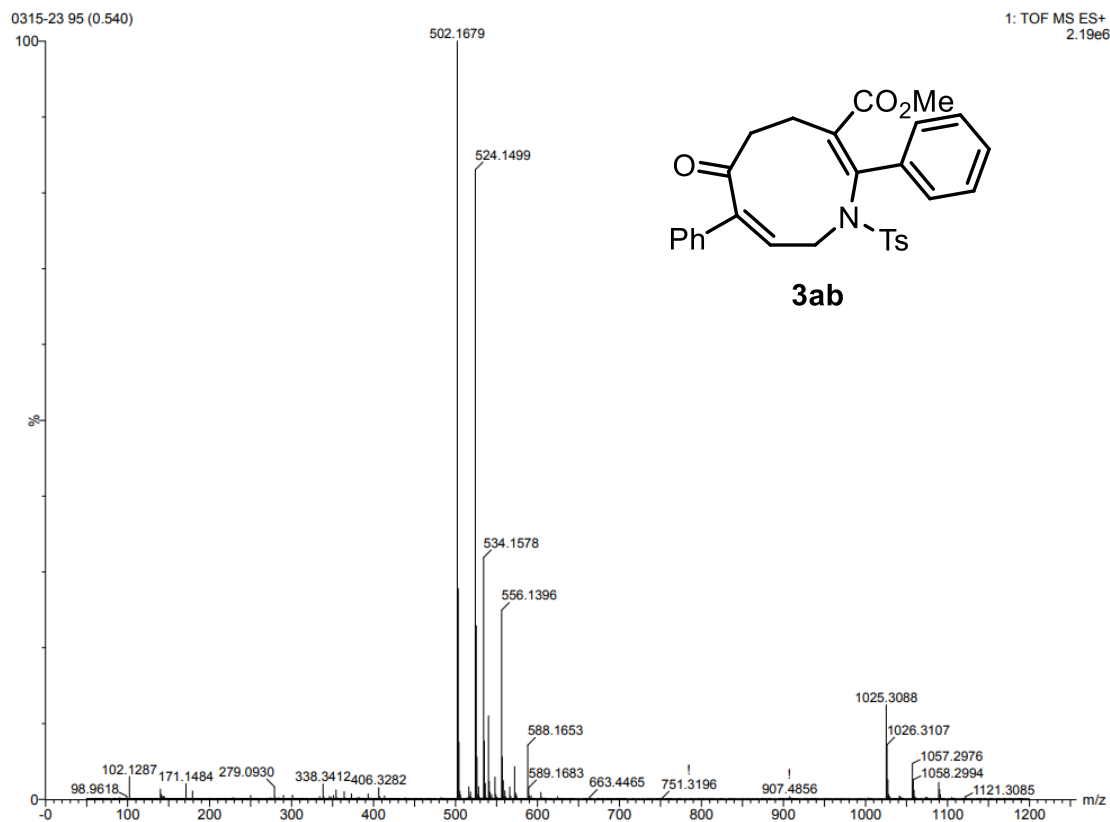

<sup>1</sup>H NMR (400 MHz, CDCl<sub>3</sub>) of **3ac**

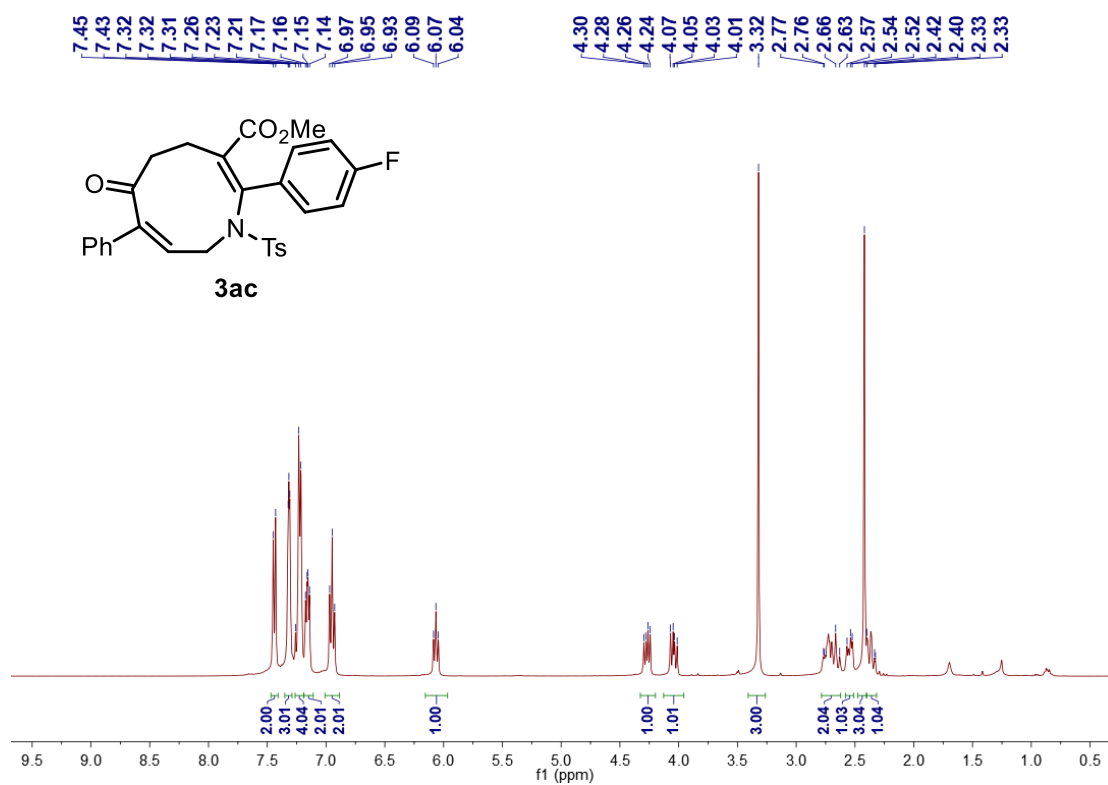

<sup>13</sup>C NMR (100 MHz, CDCl<sub>3</sub>) of **3ac**

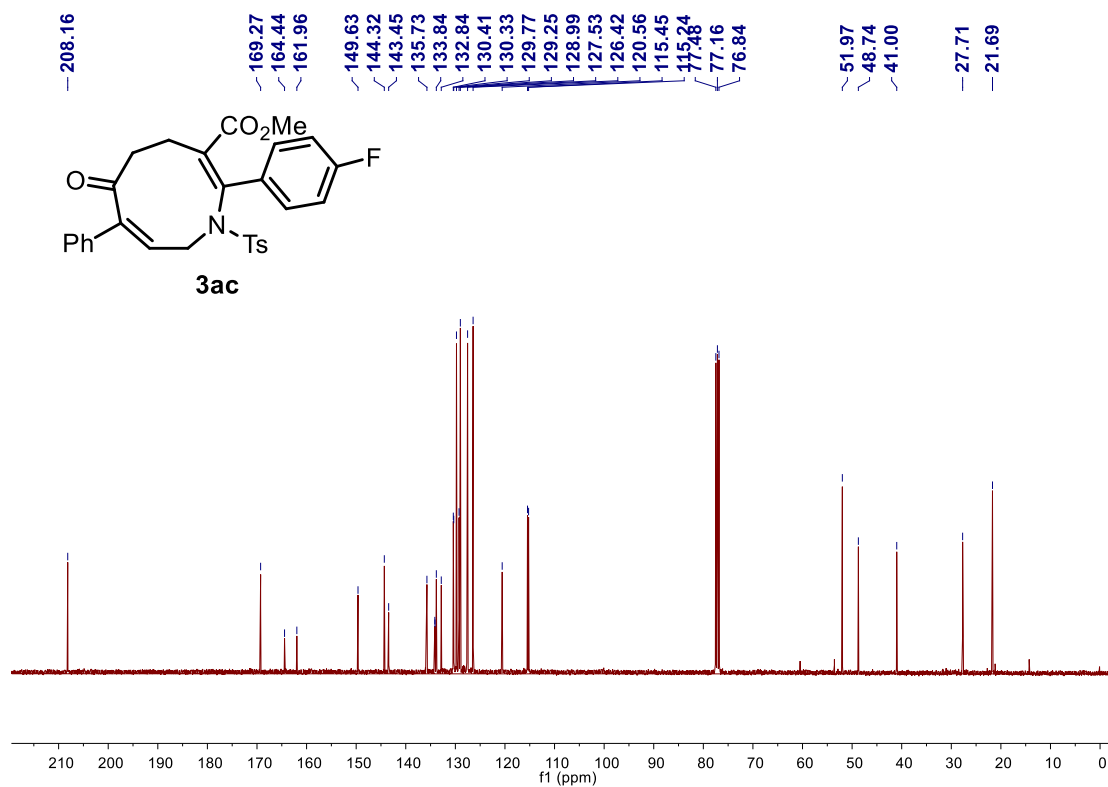

$^{19}\text{F}$  NMR (376 MHz,  $\text{CDCl}_3$ ) of **3ac**

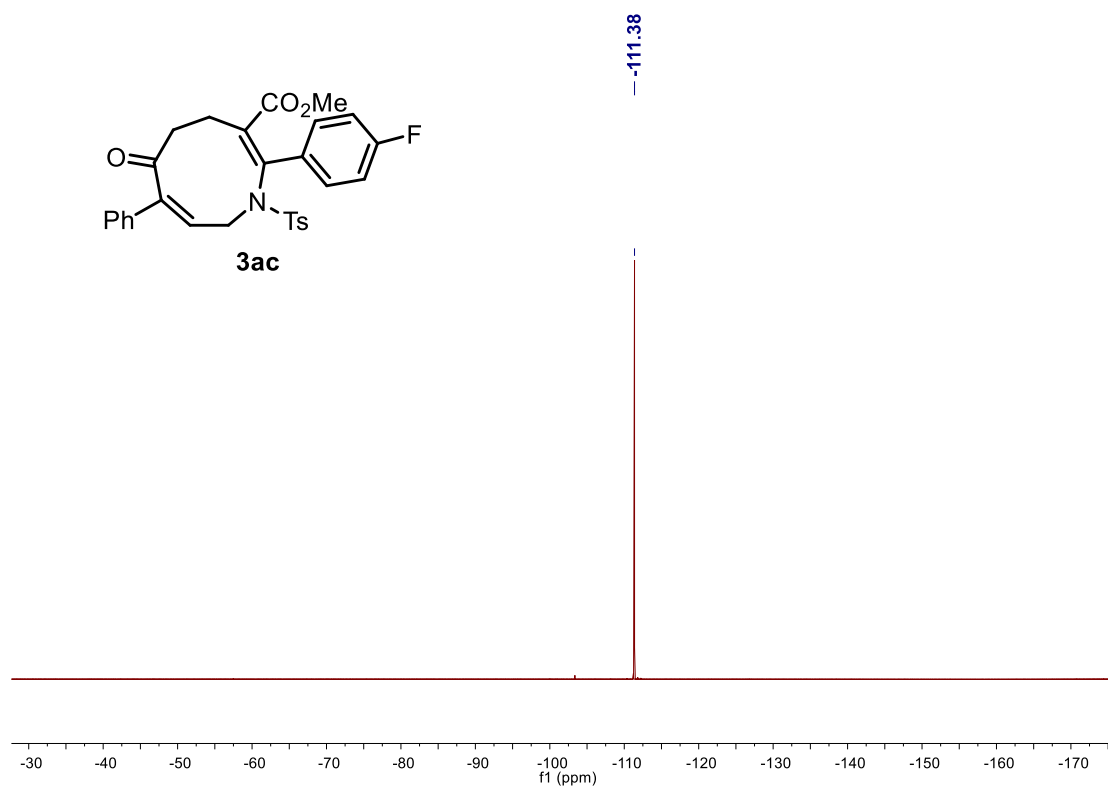

HRMS of **3ac**

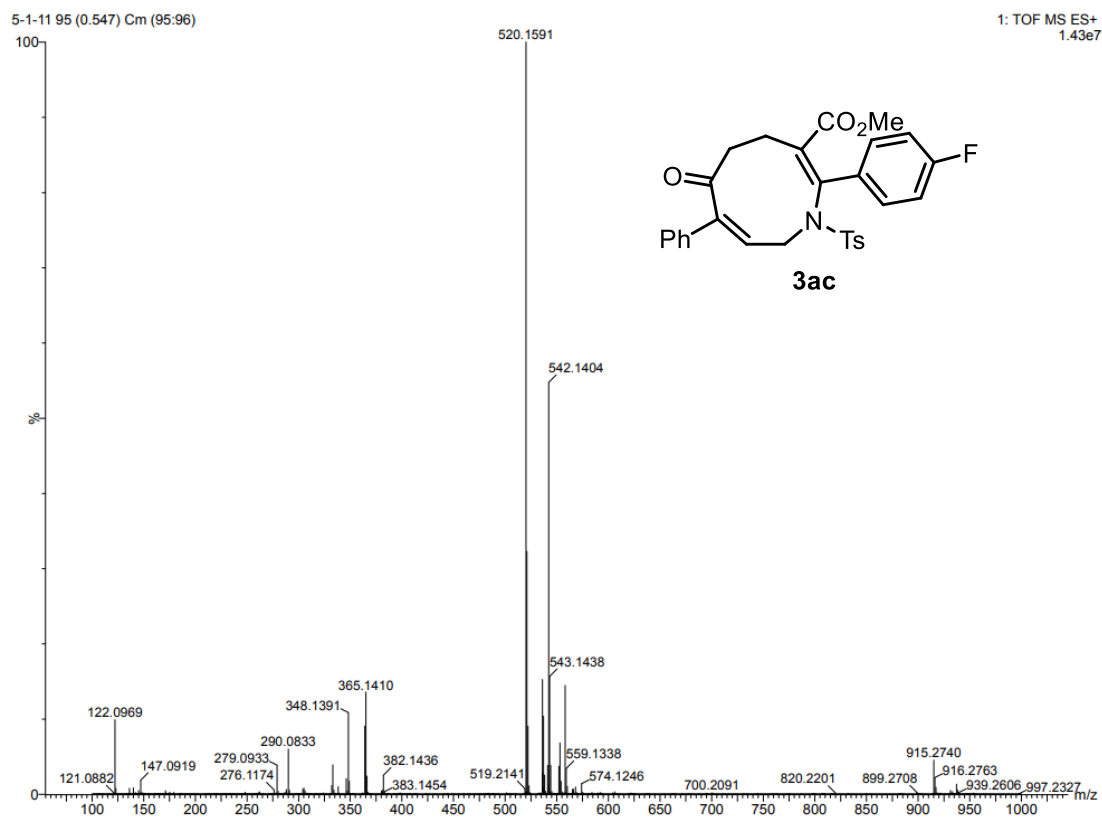

<sup>1</sup>H NMR (400 MHz, CDCl<sub>3</sub>) of **3ad**

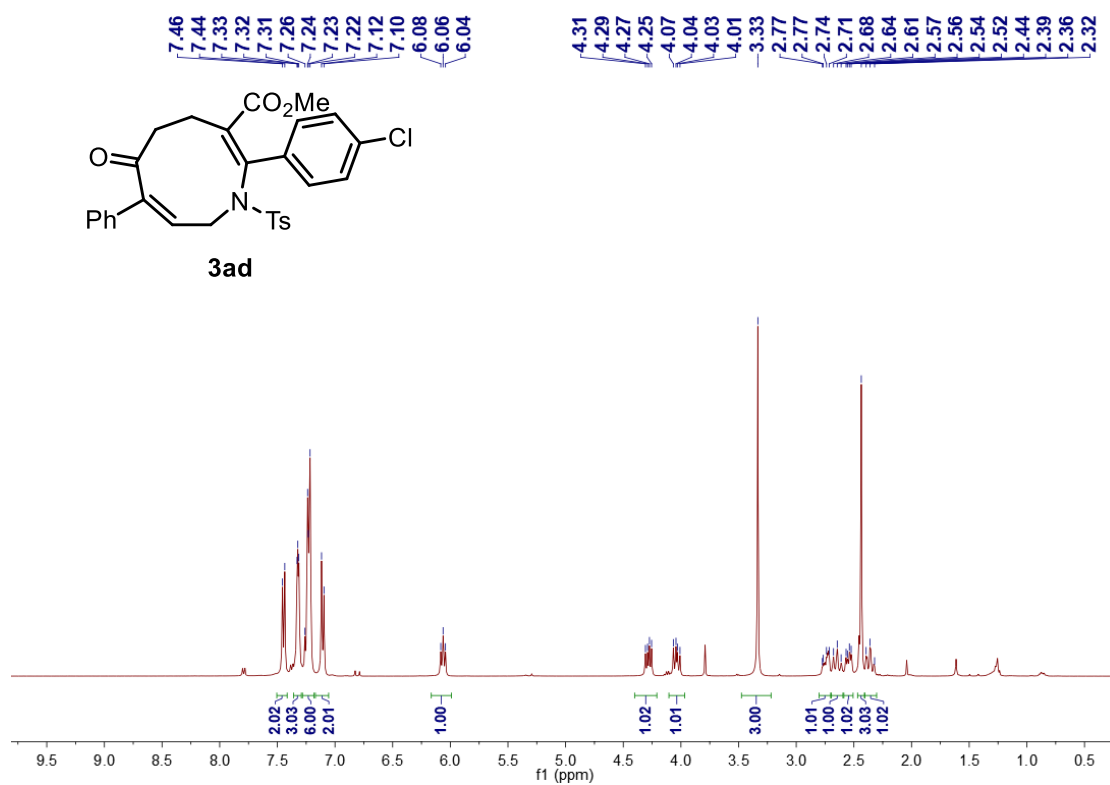

<sup>13</sup>C NMR (100 MHz, CDCl<sub>3</sub>) of **3ad**

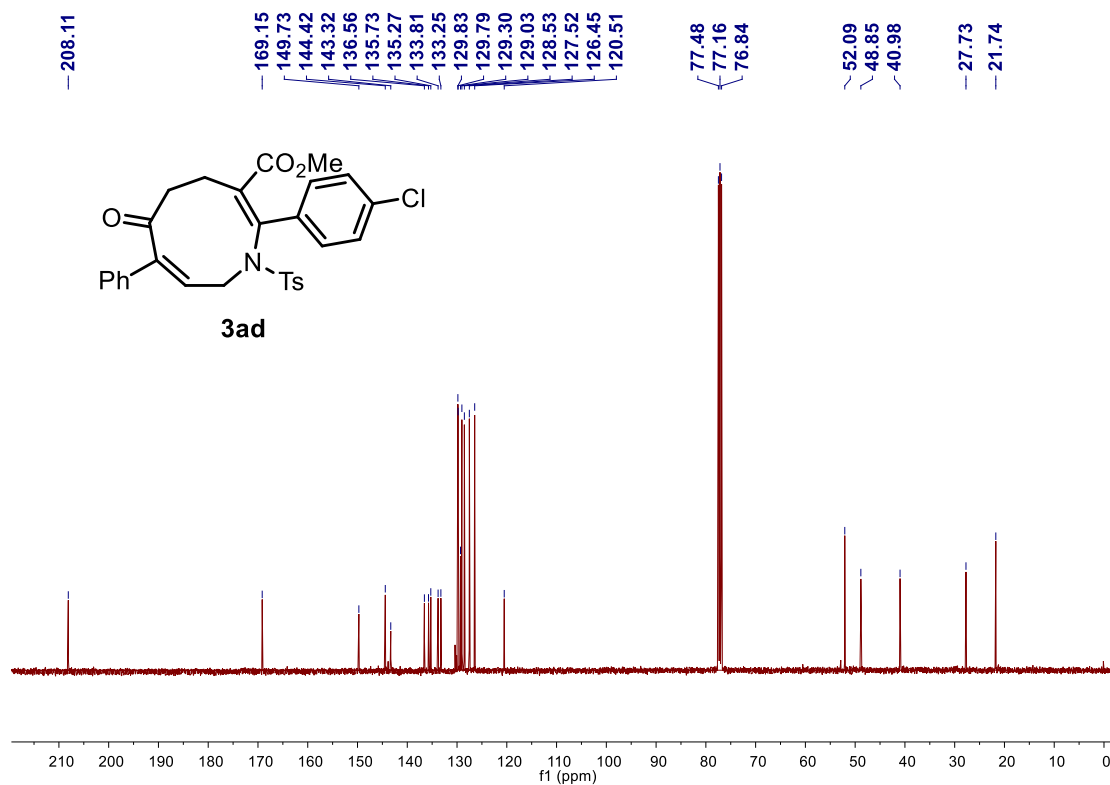

### HRMS of **3ad**

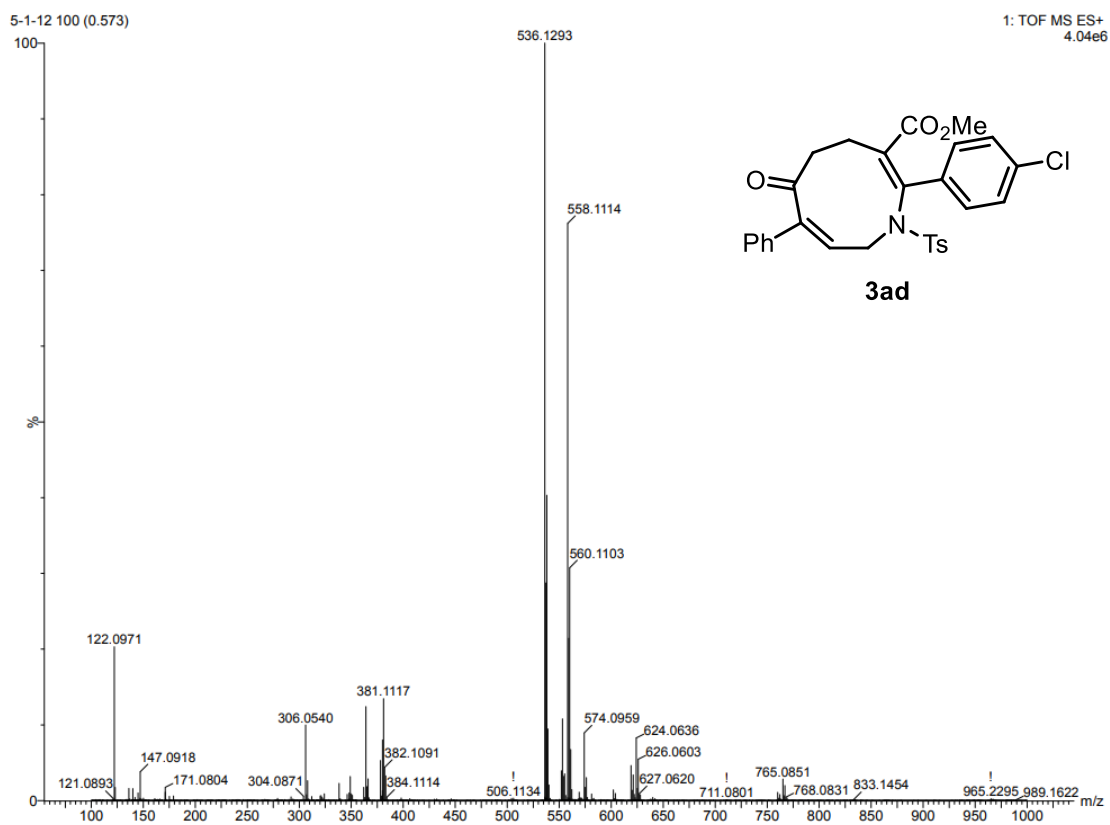

### <sup>1</sup>H NMR (400 MHz, CDCl<sub>3</sub>) of **3ae**

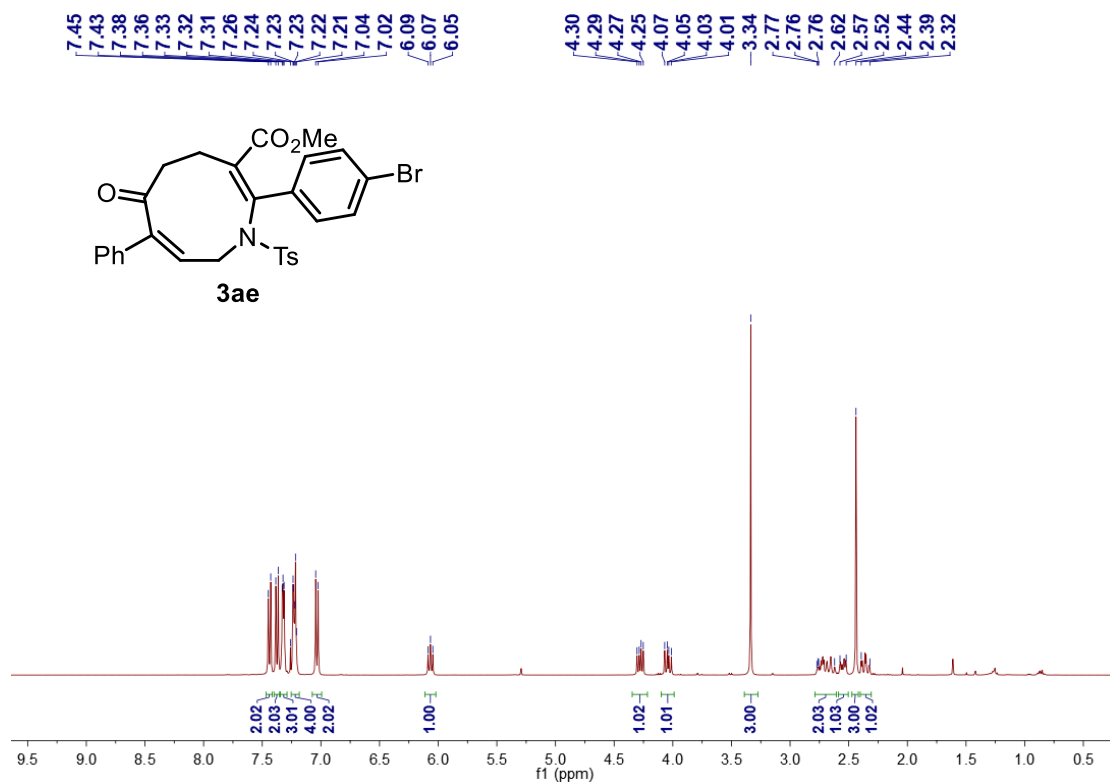

<sup>13</sup>C NMR (100 MHz, CDCl<sub>3</sub>) of **3ae**

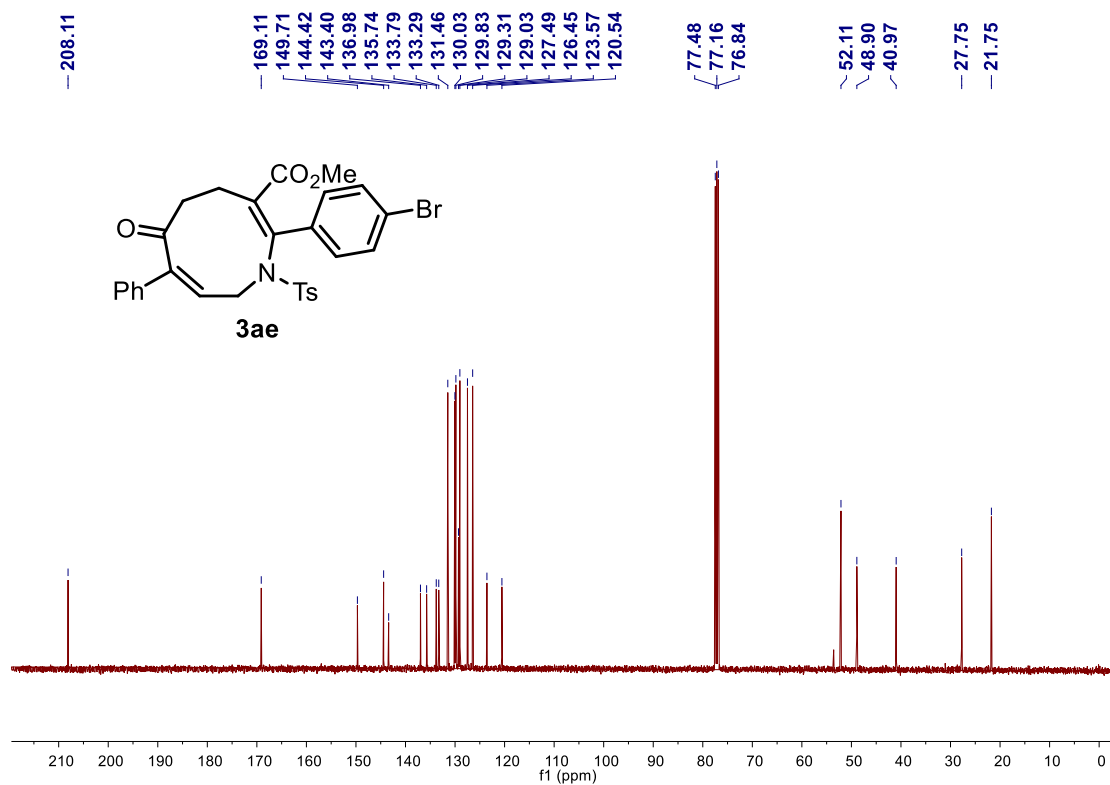

HRMS of **3ae**

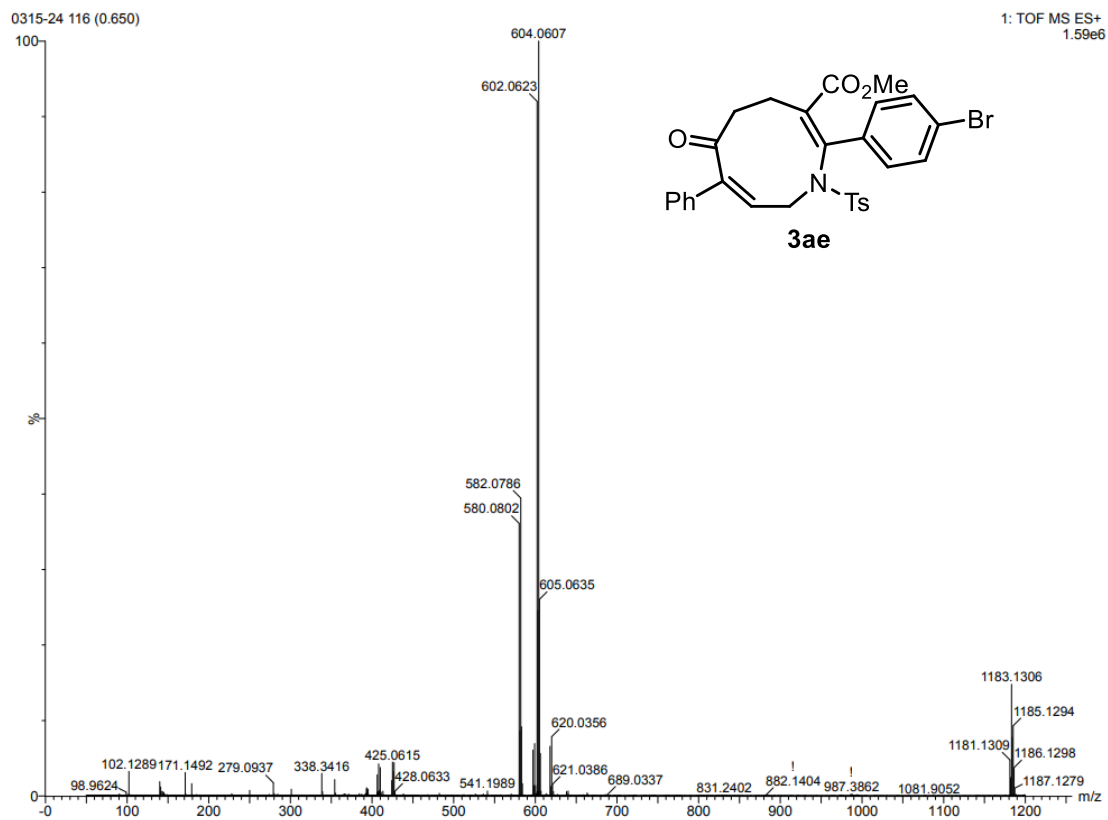



<sup>1</sup>H NMR (400 MHz, CDCl<sub>3</sub>) of **3af**

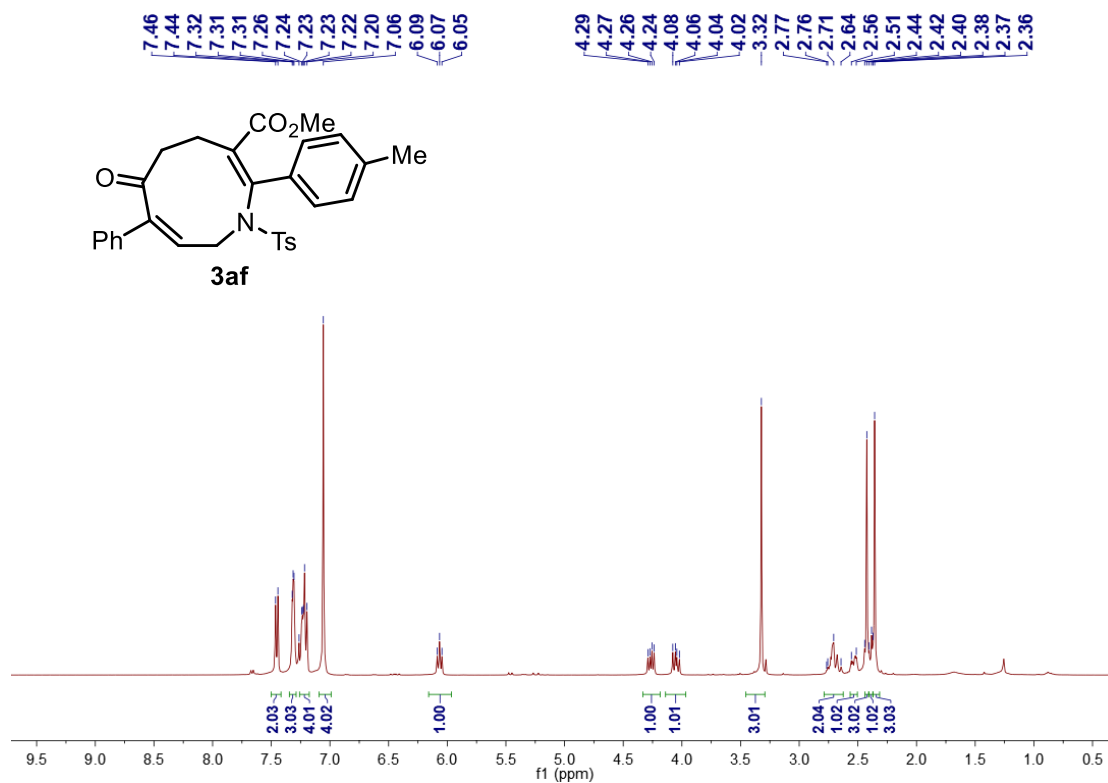

<sup>13</sup>C NMR (100 MHz, CDCl<sub>3</sub>) of **3af**

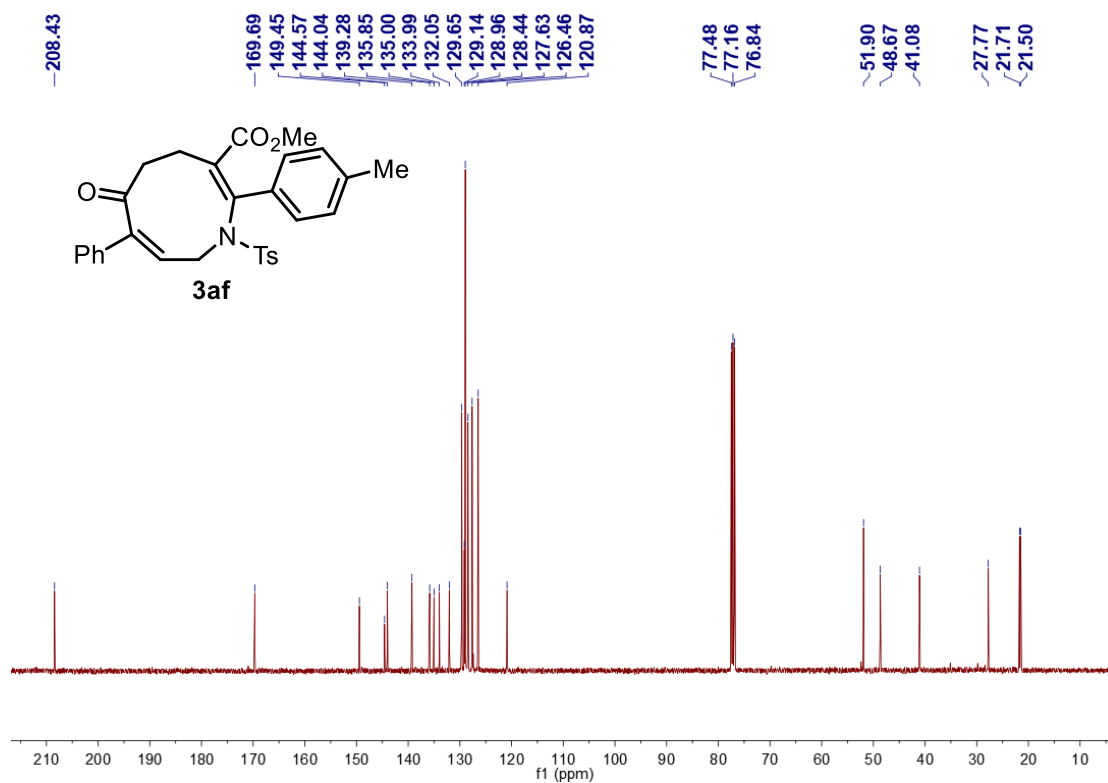

## HRMS of 3af

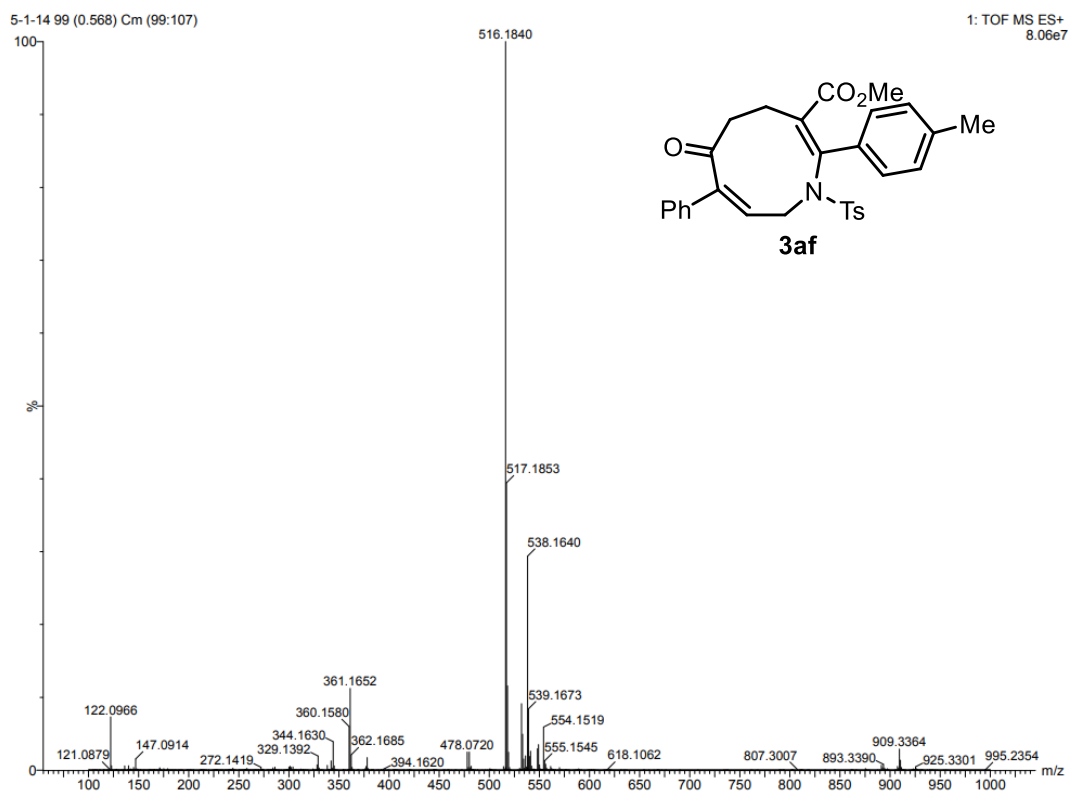

## <sup>1</sup>H NMR (400 MHz, CDCl<sub>3</sub>) of 3ag

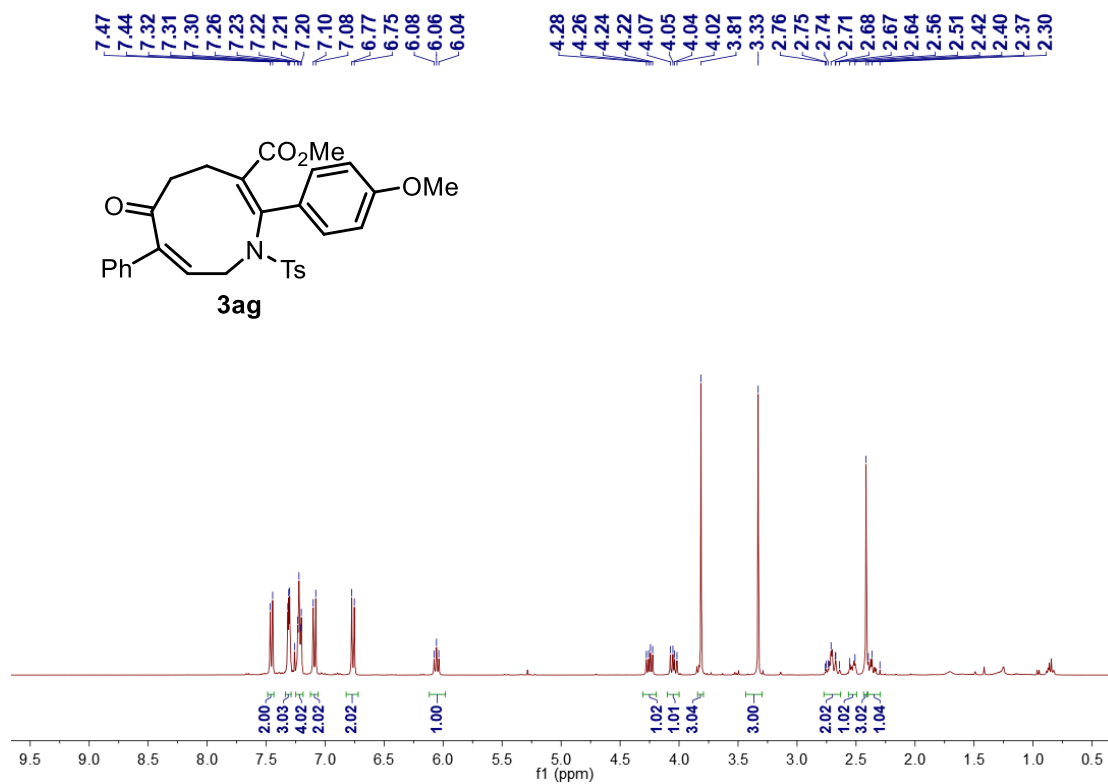

<sup>13</sup>C NMR (100 MHz, CDCl<sub>3</sub>) of **3ag**

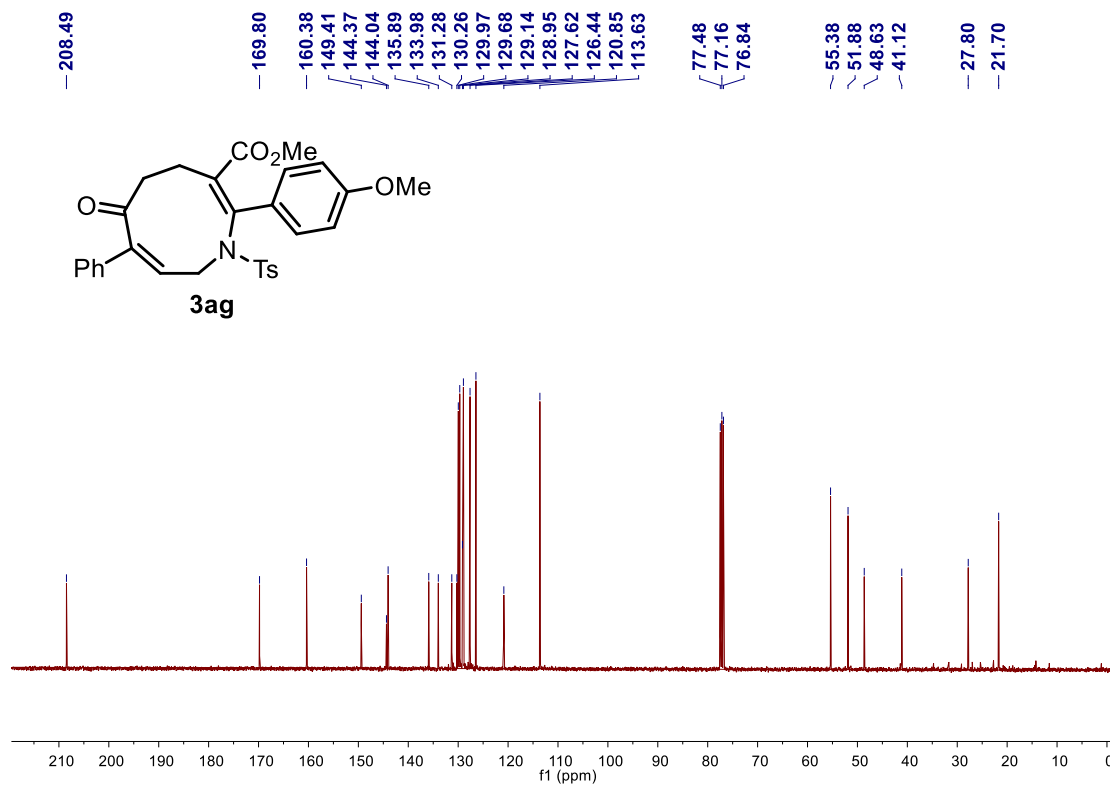

HRMS of **3ag**

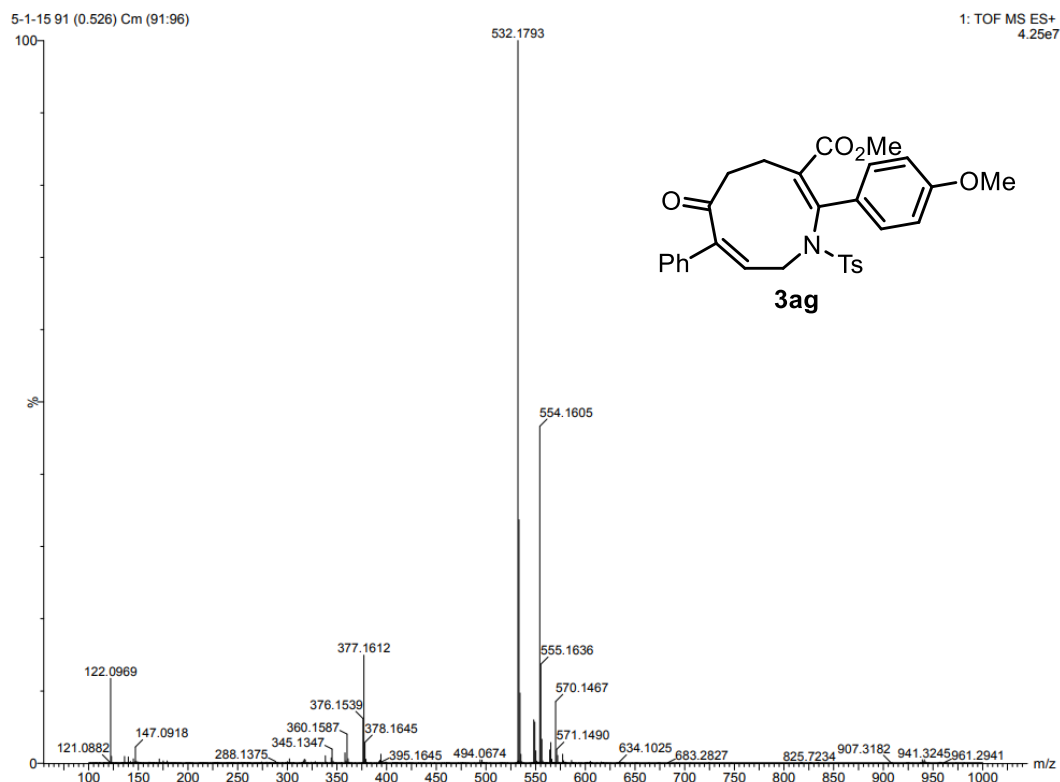

<sup>1</sup>H NMR (400 MHz, CDCl<sub>3</sub>) of **3ah**

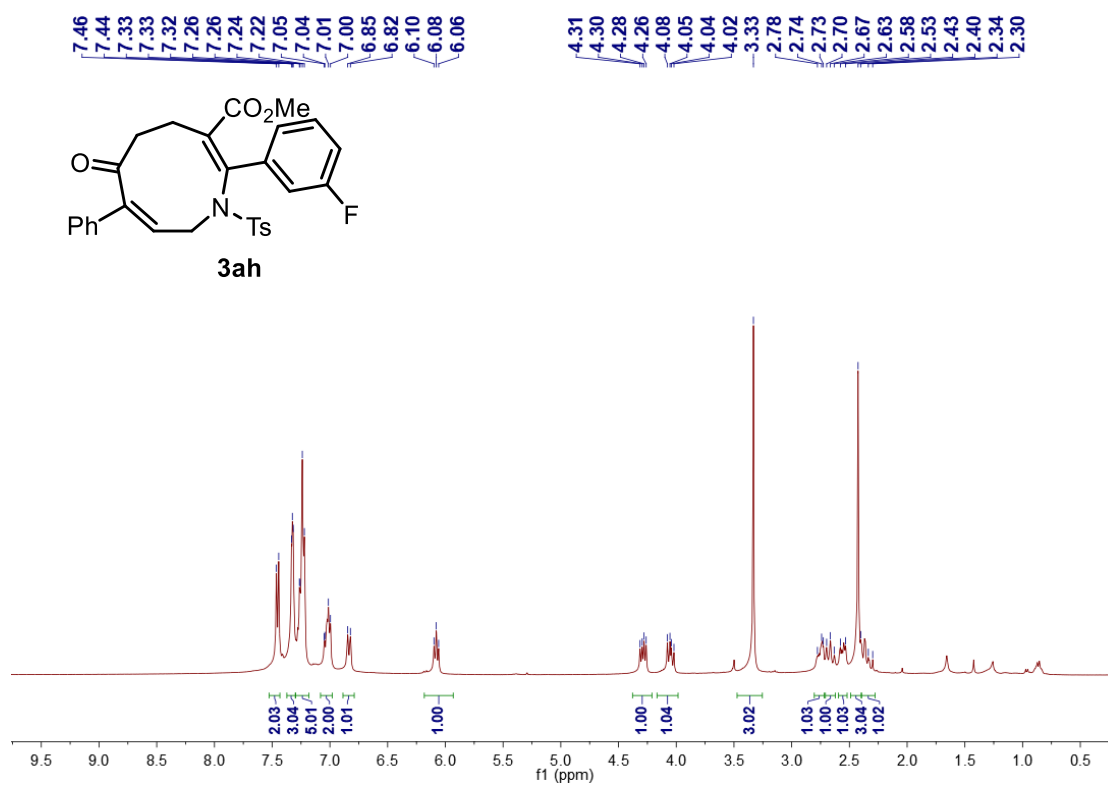

<sup>13</sup>C NMR (100 MHz, CDCl<sub>3</sub>) of **3ah**

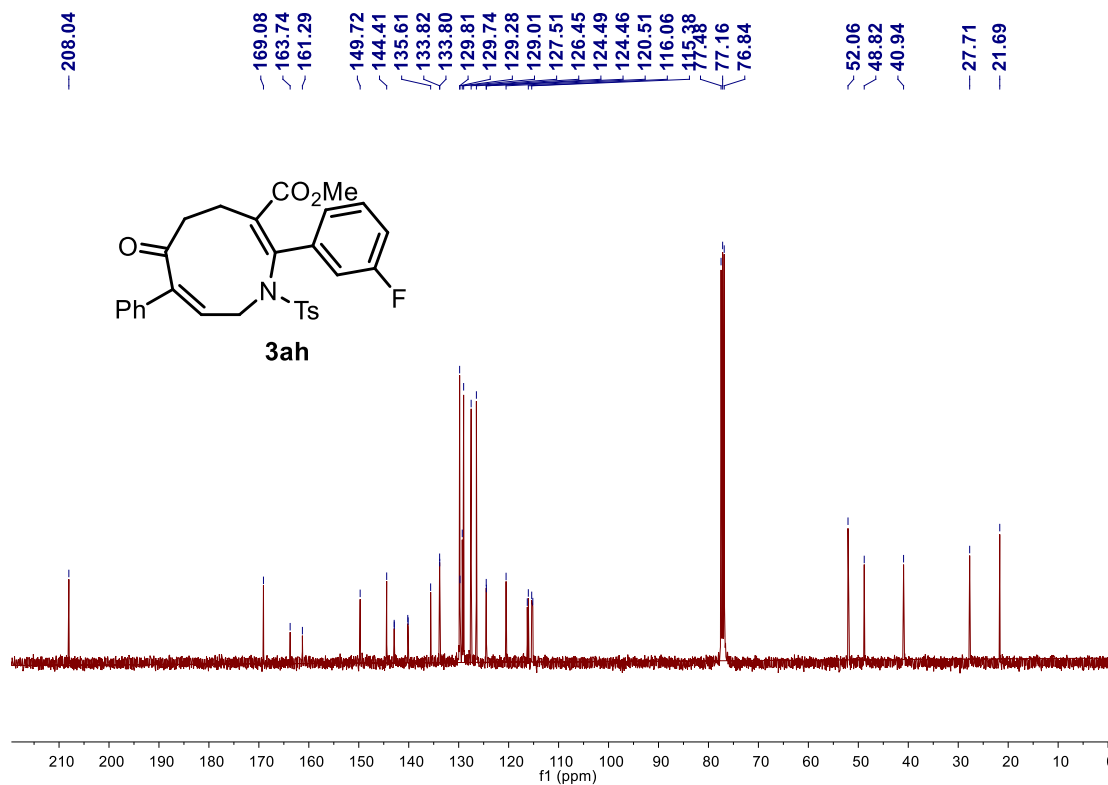

$^{19}\text{F}$  NMR (376 MHz,  $\text{CDCl}_3$ ) of **3ah**

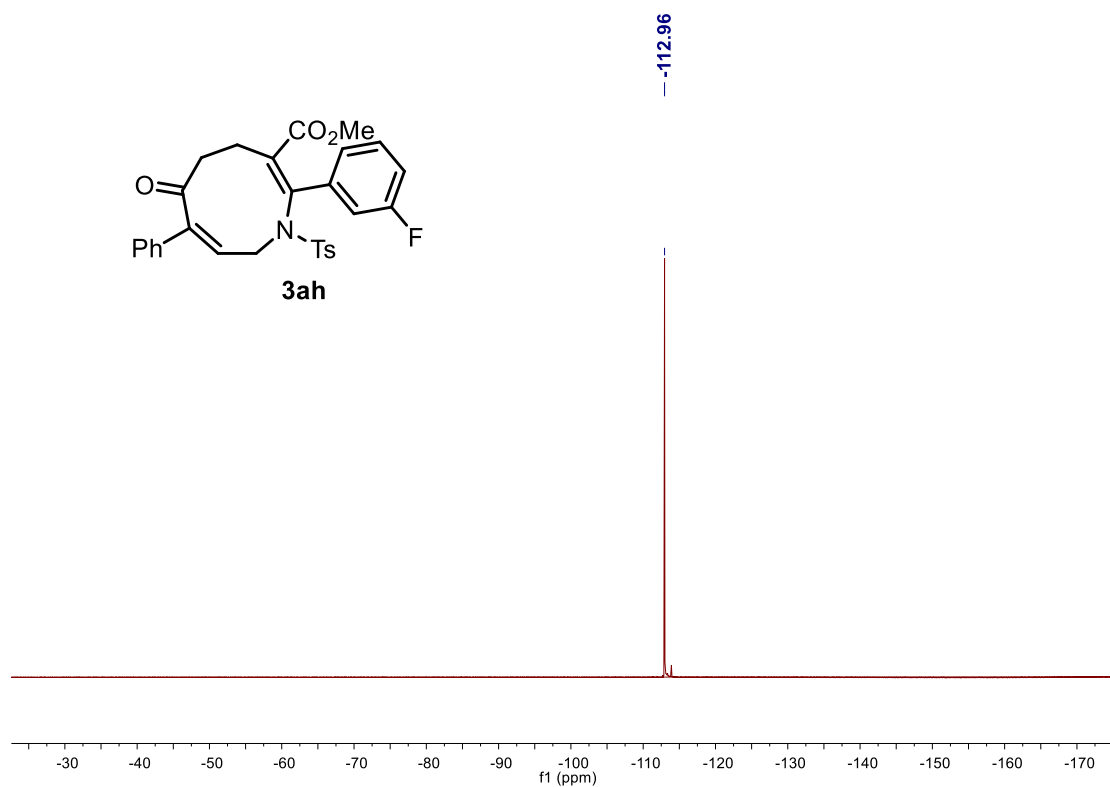

HRMS of **3ah**

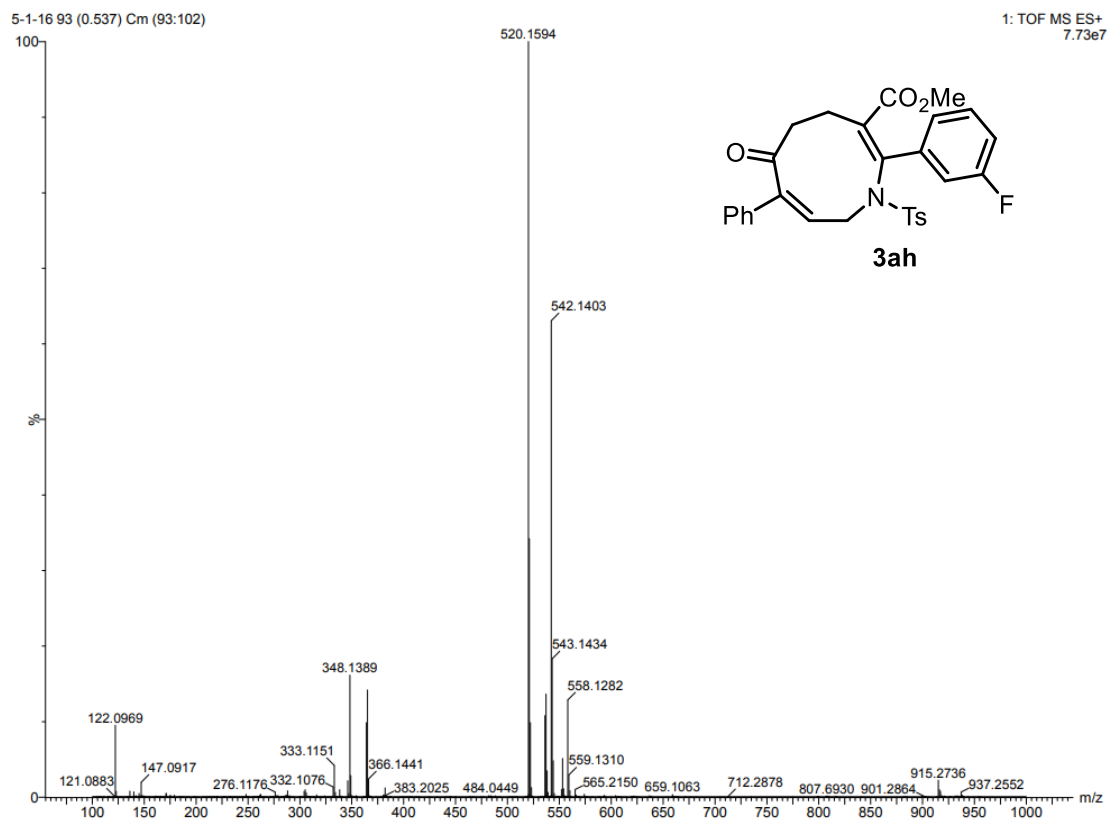

<sup>1</sup>H NMR (400 MHz, CDCl<sub>3</sub>) of **3ai**

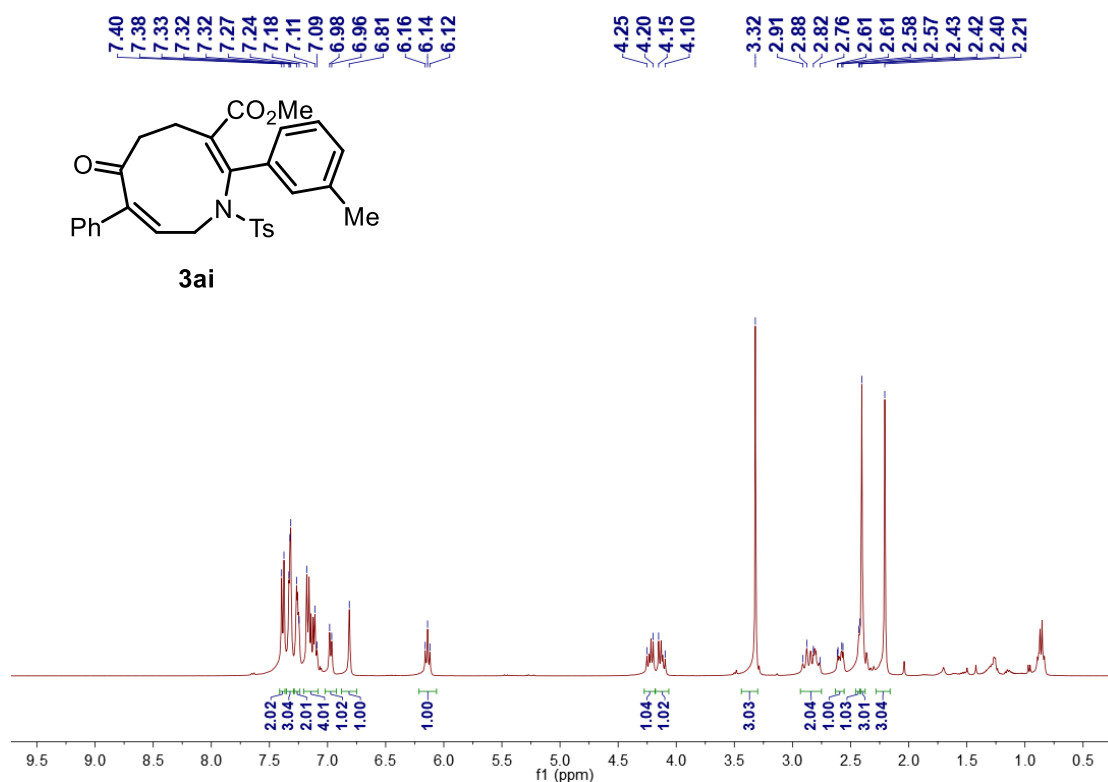

<sup>13</sup>C NMR (100 MHz, CDCl<sub>3</sub>) of **3ai**

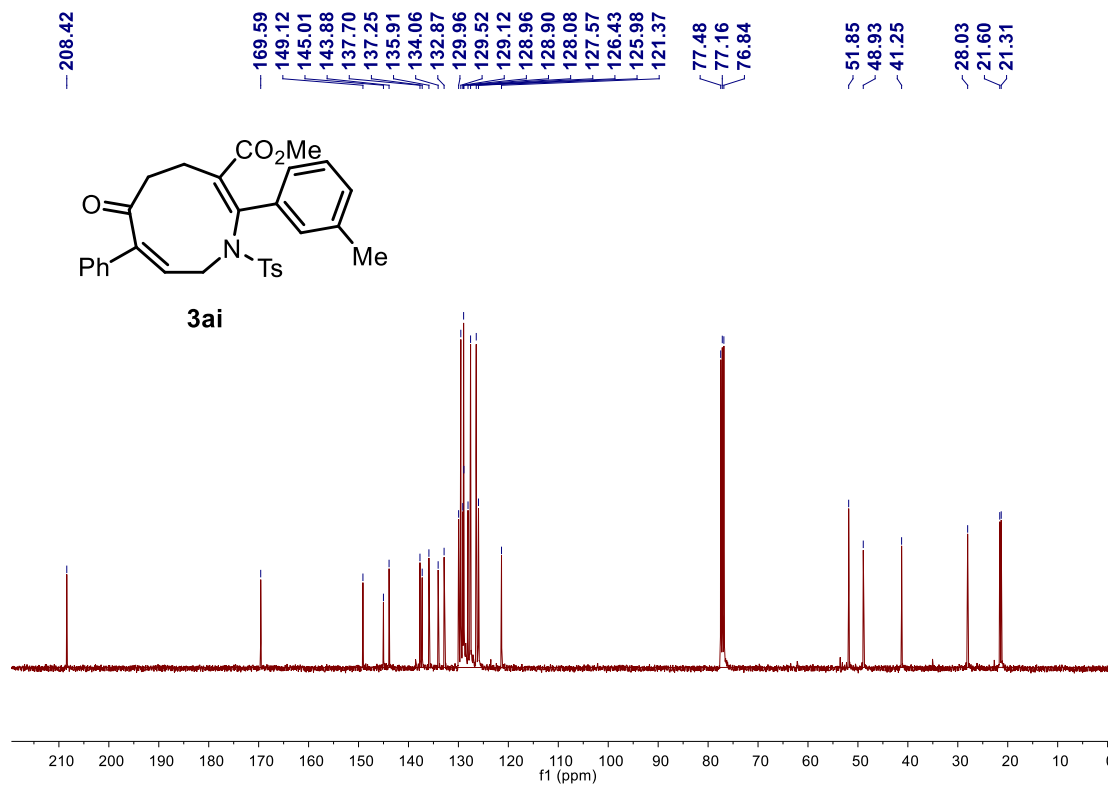

## HRMS of 3ai

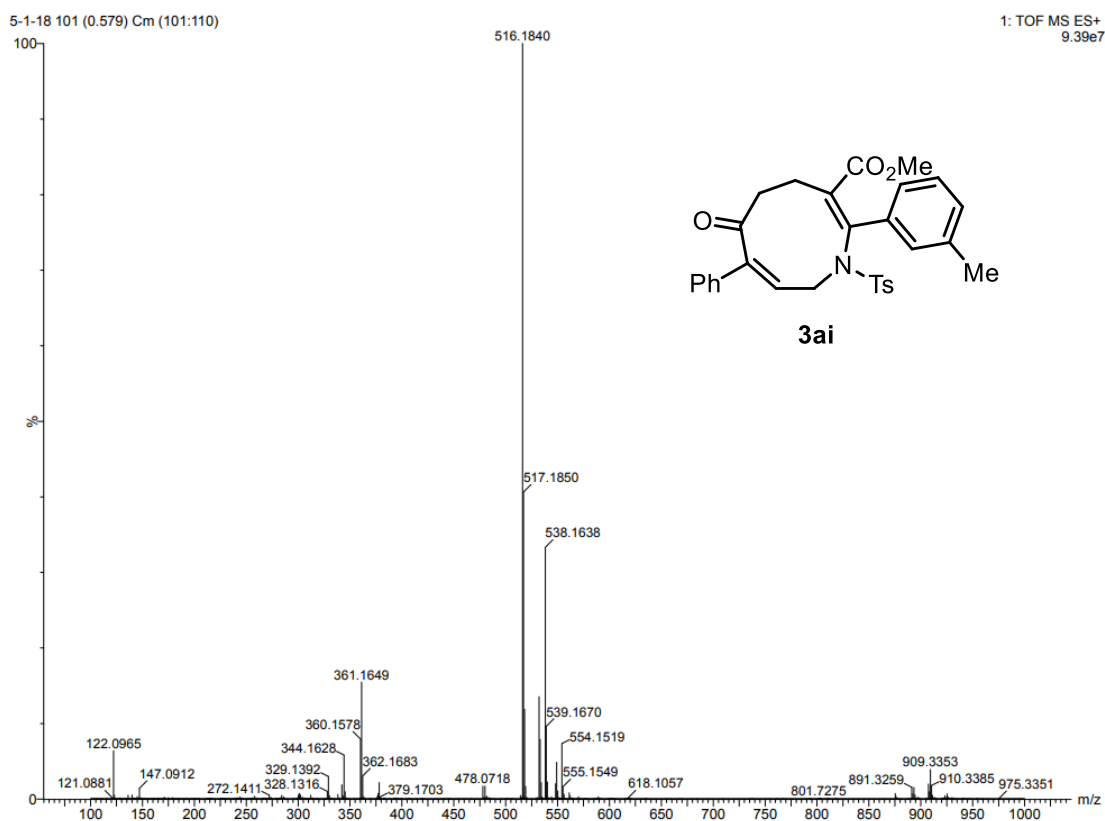

## <sup>1</sup>H NMR (400 MHz, CDCl<sub>3</sub>) of 3aj

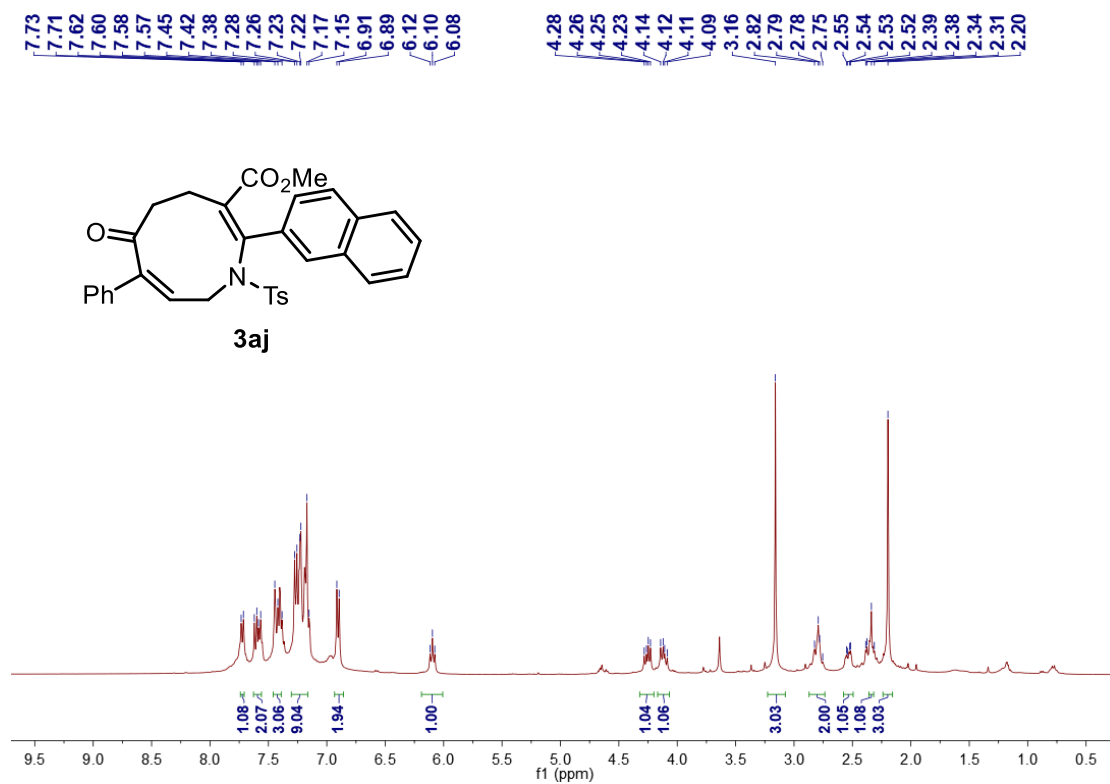

$^{13}\text{C}$  NMR (100 MHz,  $\text{CDCl}_3$ ) of **3aj**

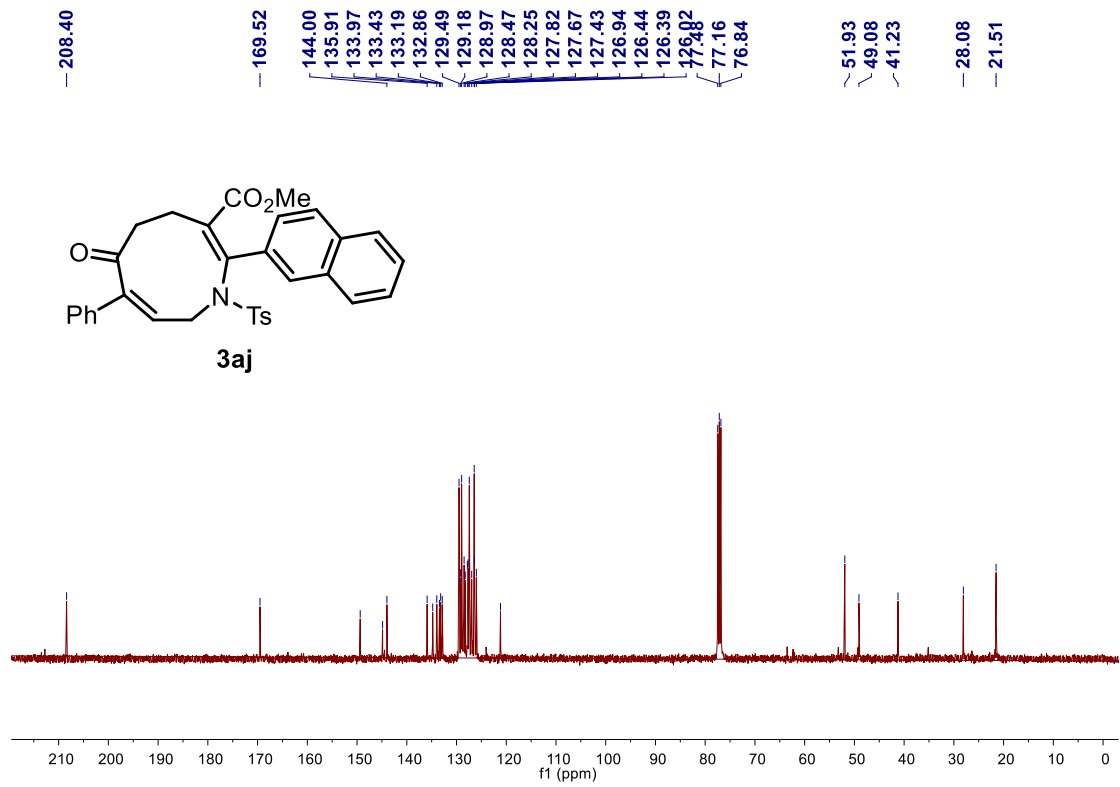

HRMS of **3aj**

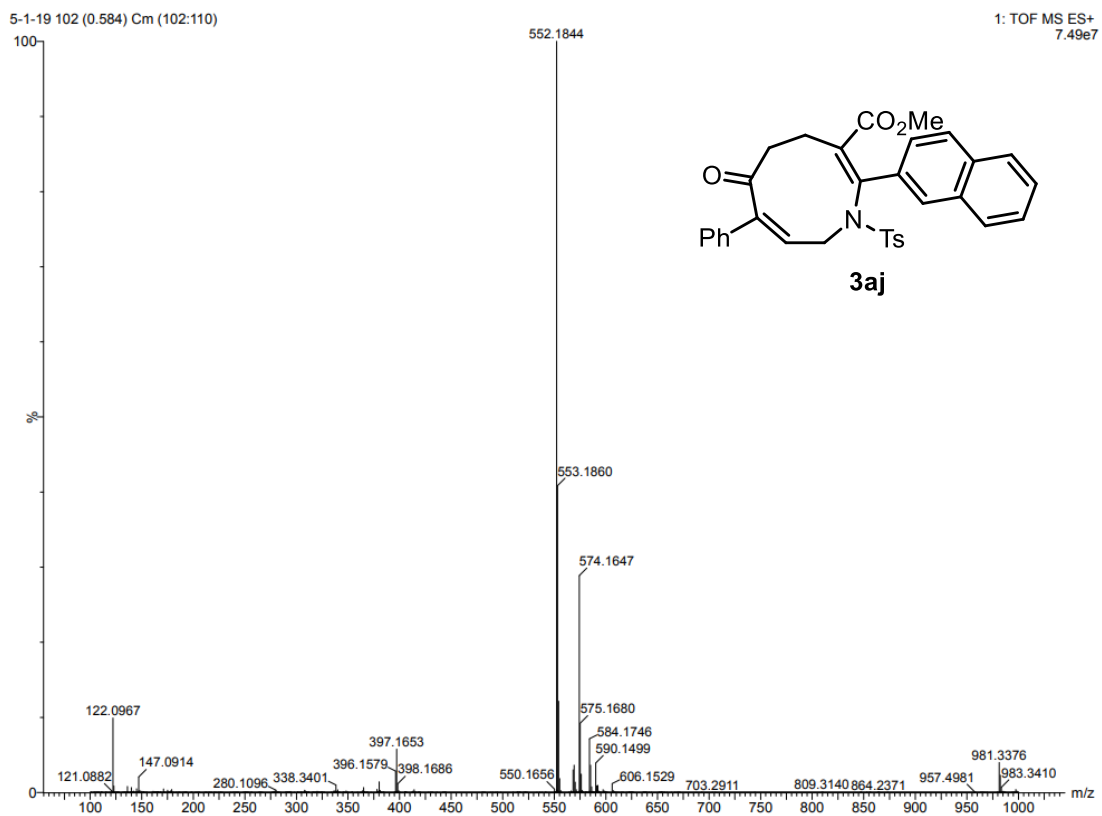



<sup>1</sup>H NMR (400 MHz, CDCl<sub>3</sub>) of **3ak**

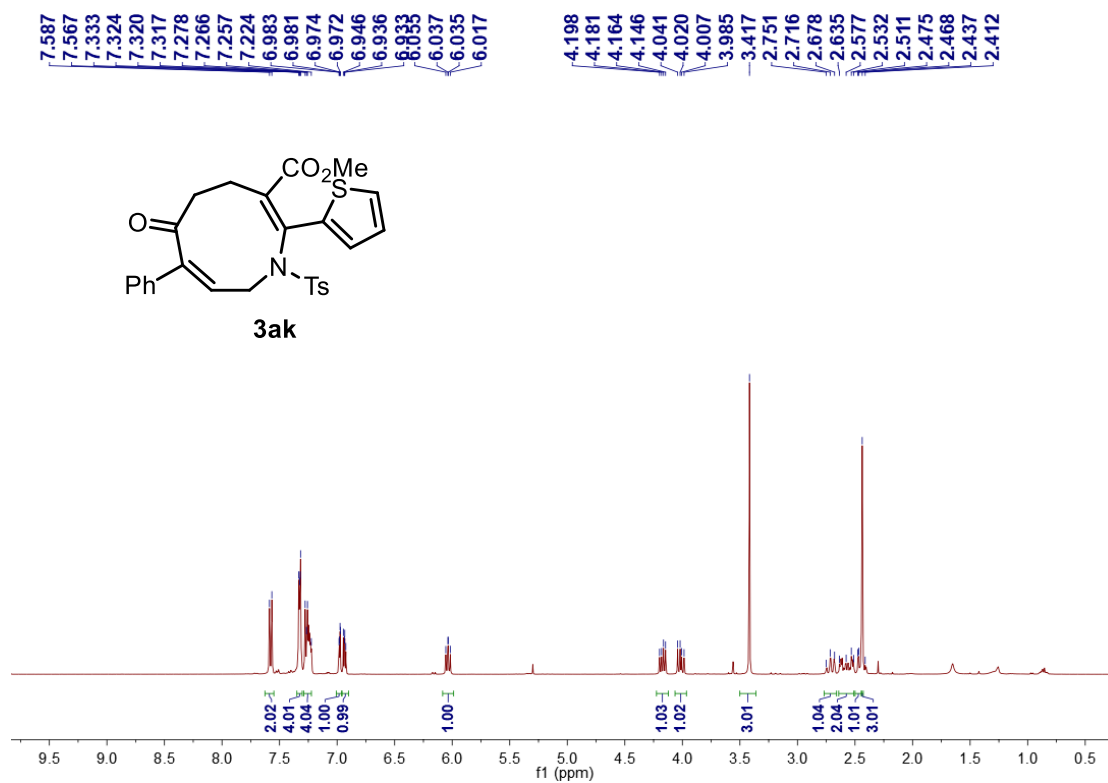

<sup>13</sup>C NMR (100 MHz, CDCl<sub>3</sub>) of **3ak**

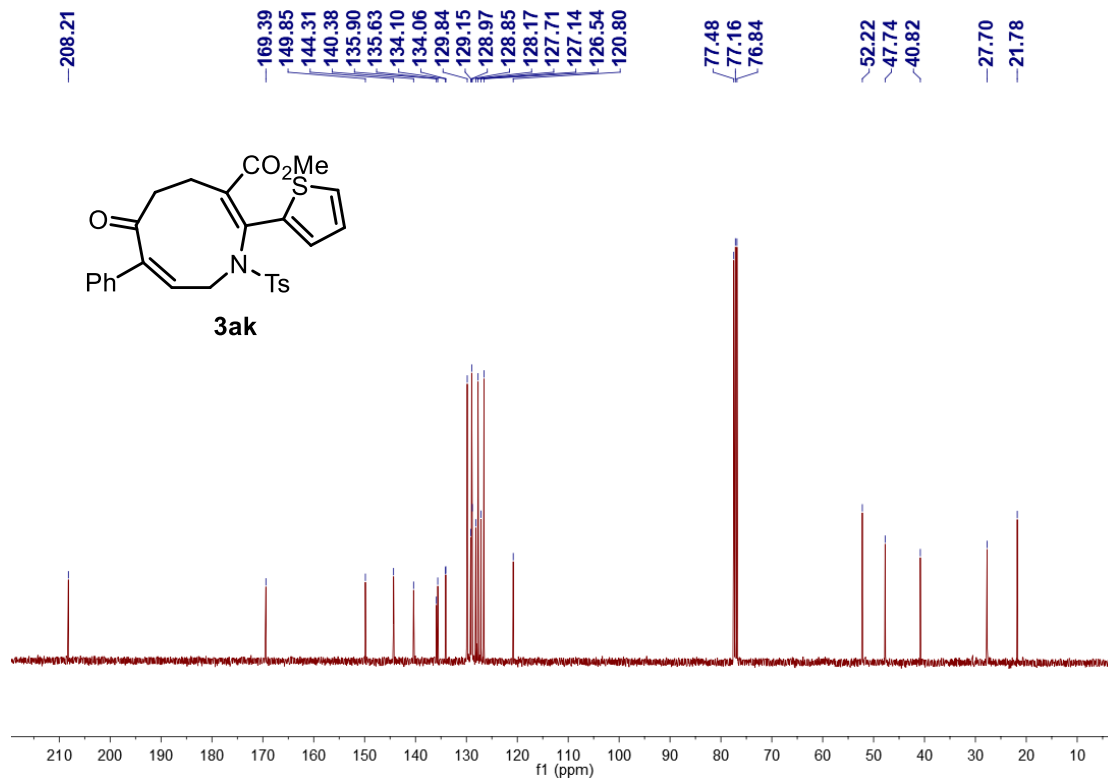

### HRMS of **3ak**

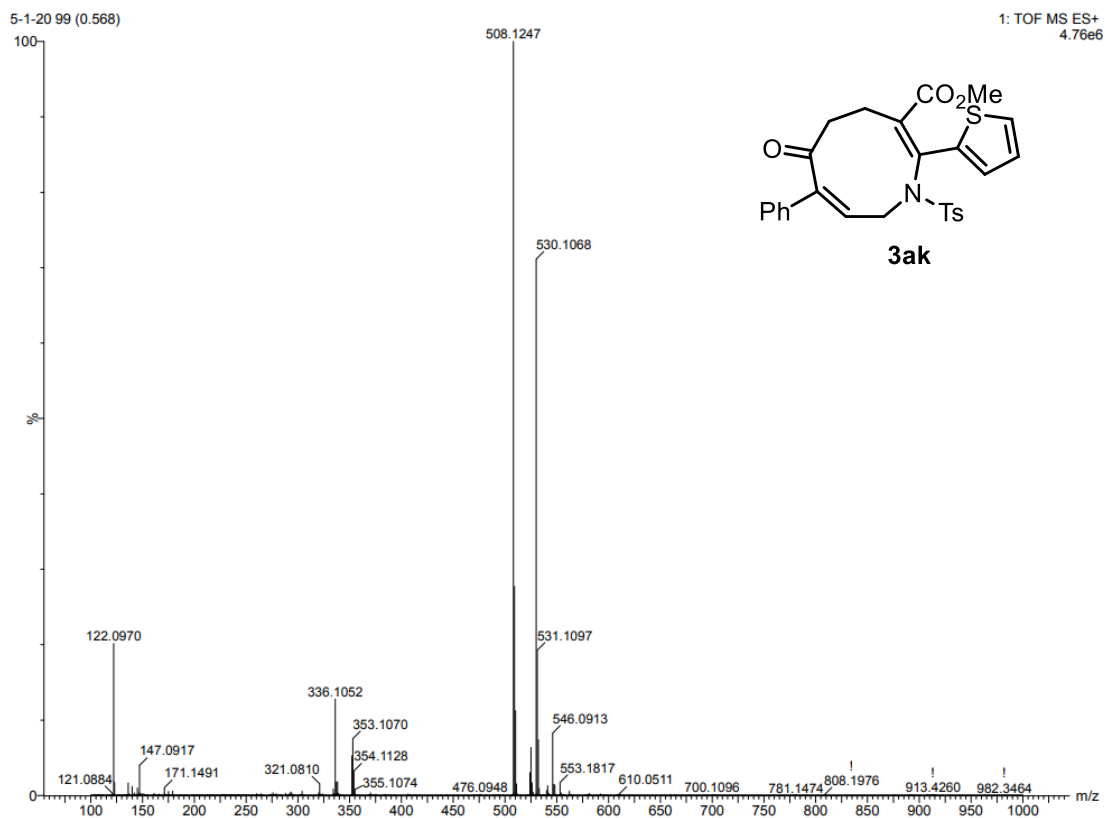

### <sup>1</sup>H NMR (400 MHz, CDCl<sub>3</sub>) of **3al**

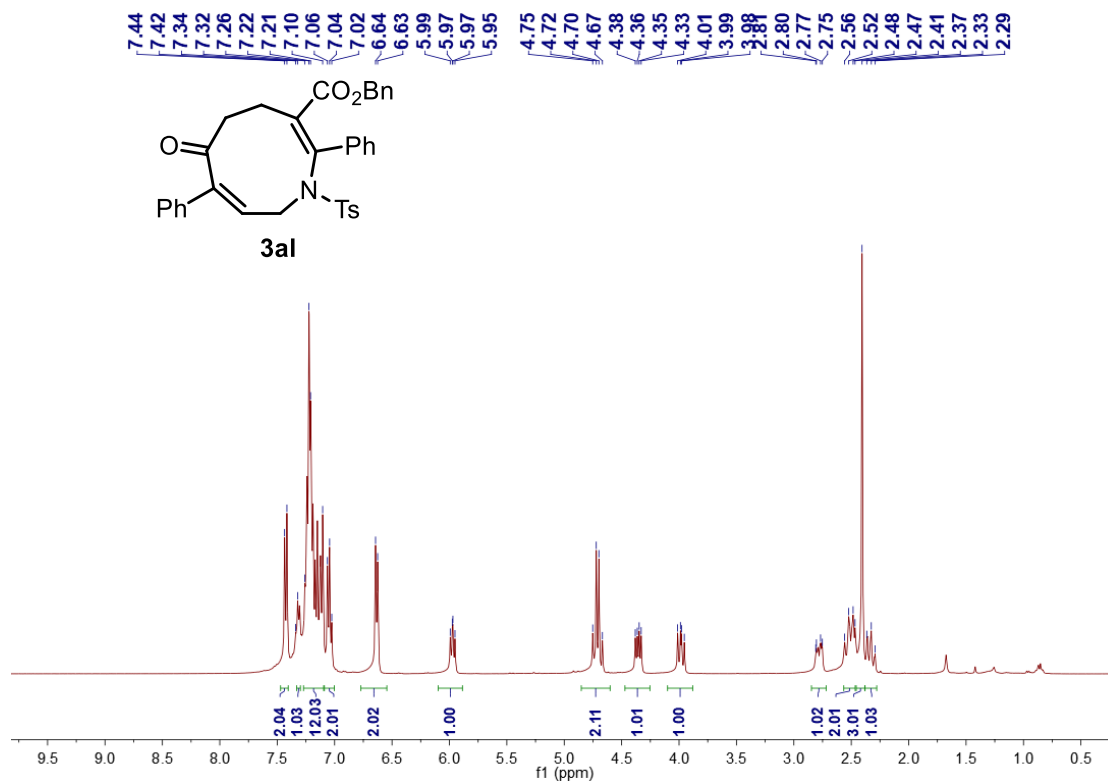

### <sup>13</sup>C NMR (100 MHz, CDCl<sub>3</sub>) of **3al**

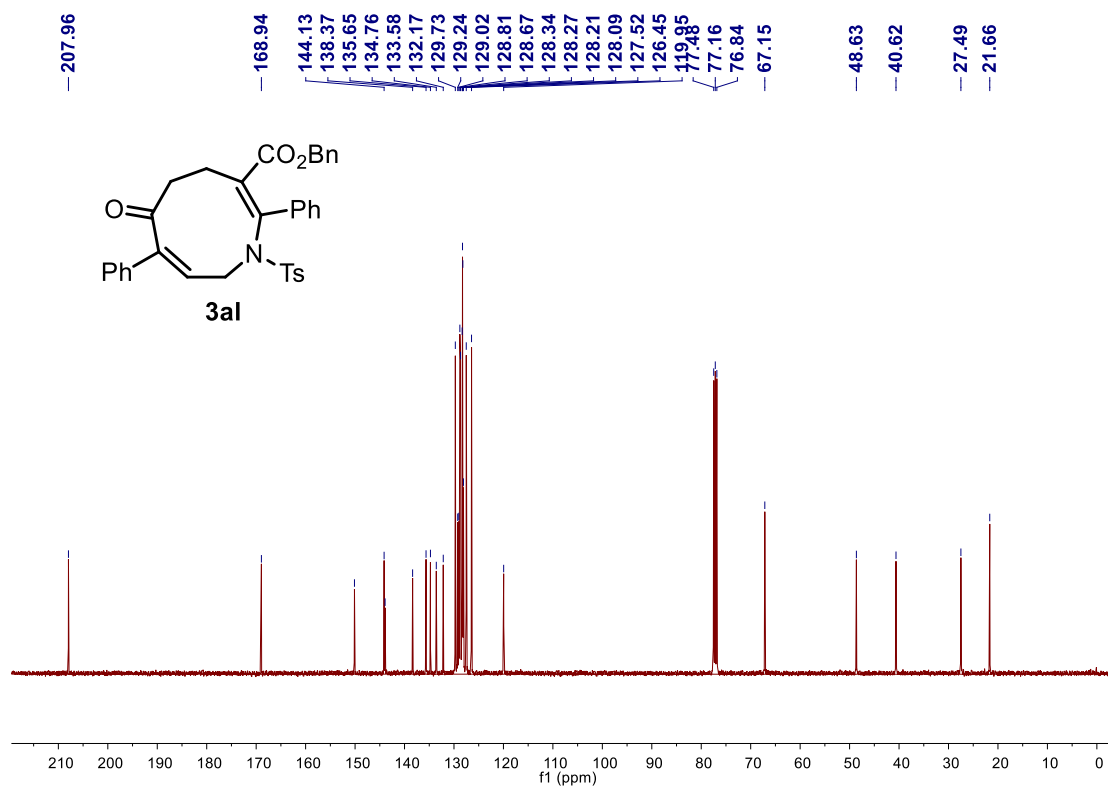

### HRMS of **3al**

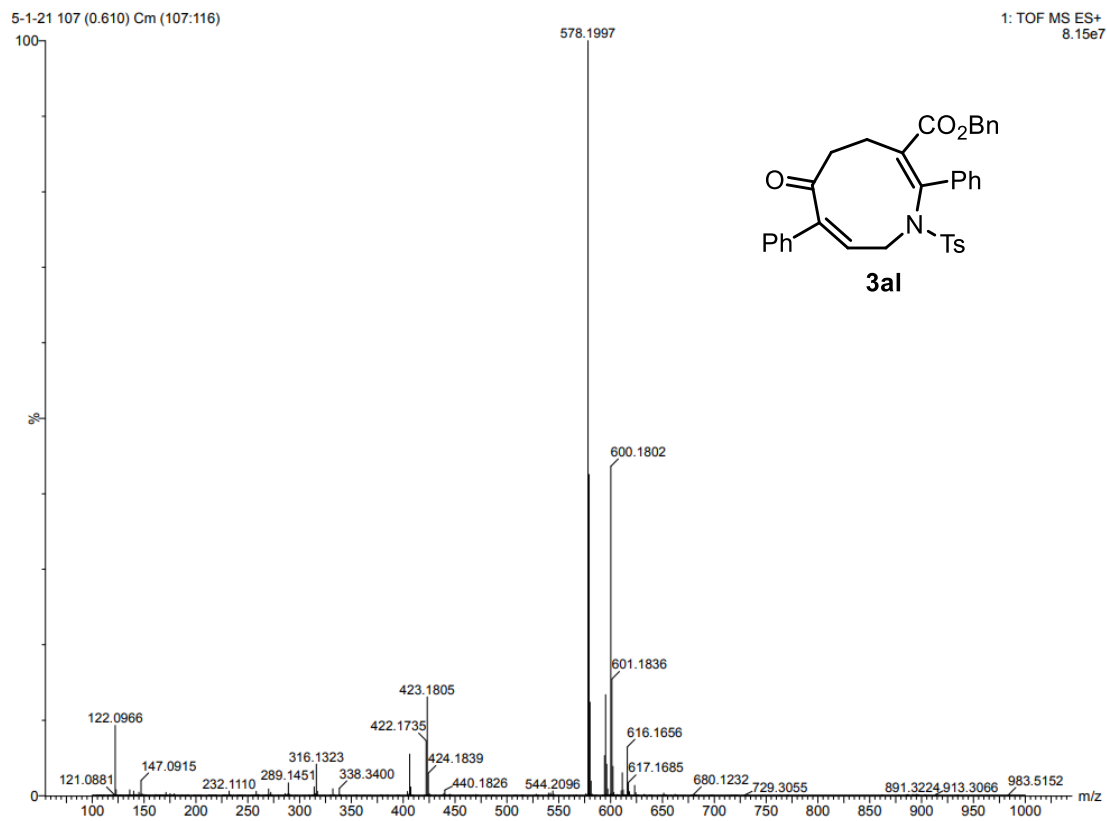

<sup>1</sup>H NMR (400 MHz, CDCl<sub>3</sub>) of **3am**

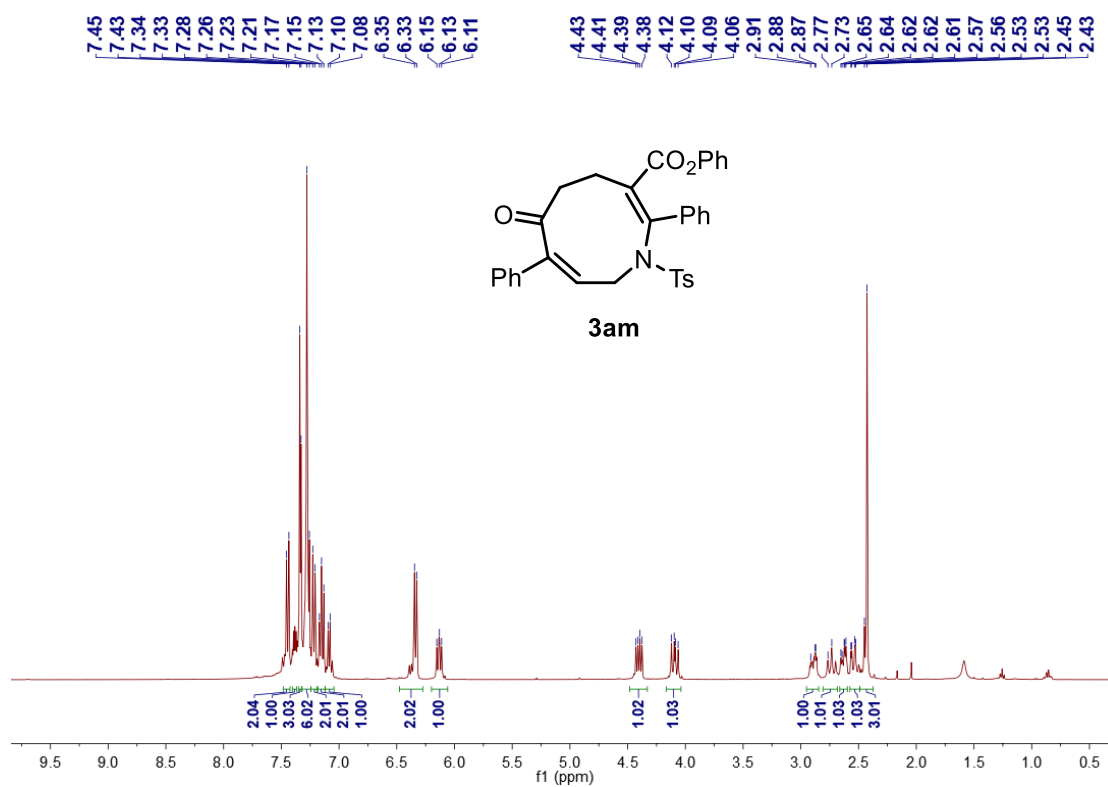

<sup>13</sup>C NMR (100 MHz, CDCl<sub>3</sub>) of **3am**

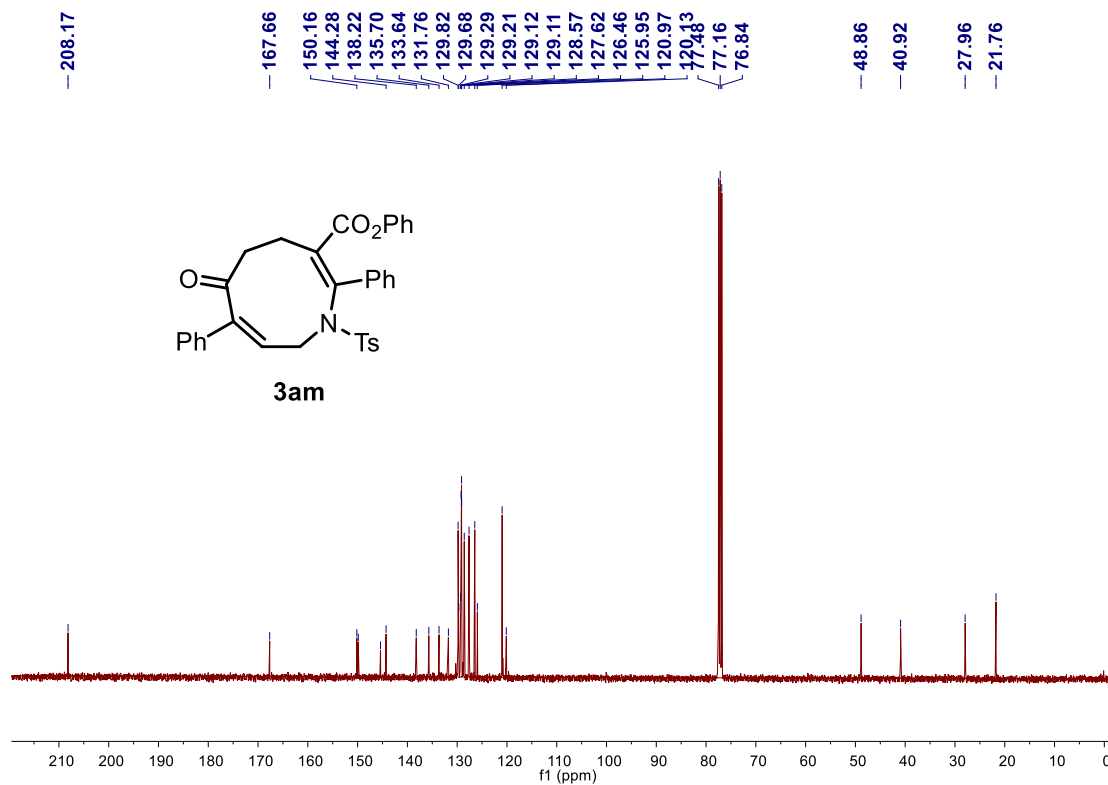

## HRMS of **3am**

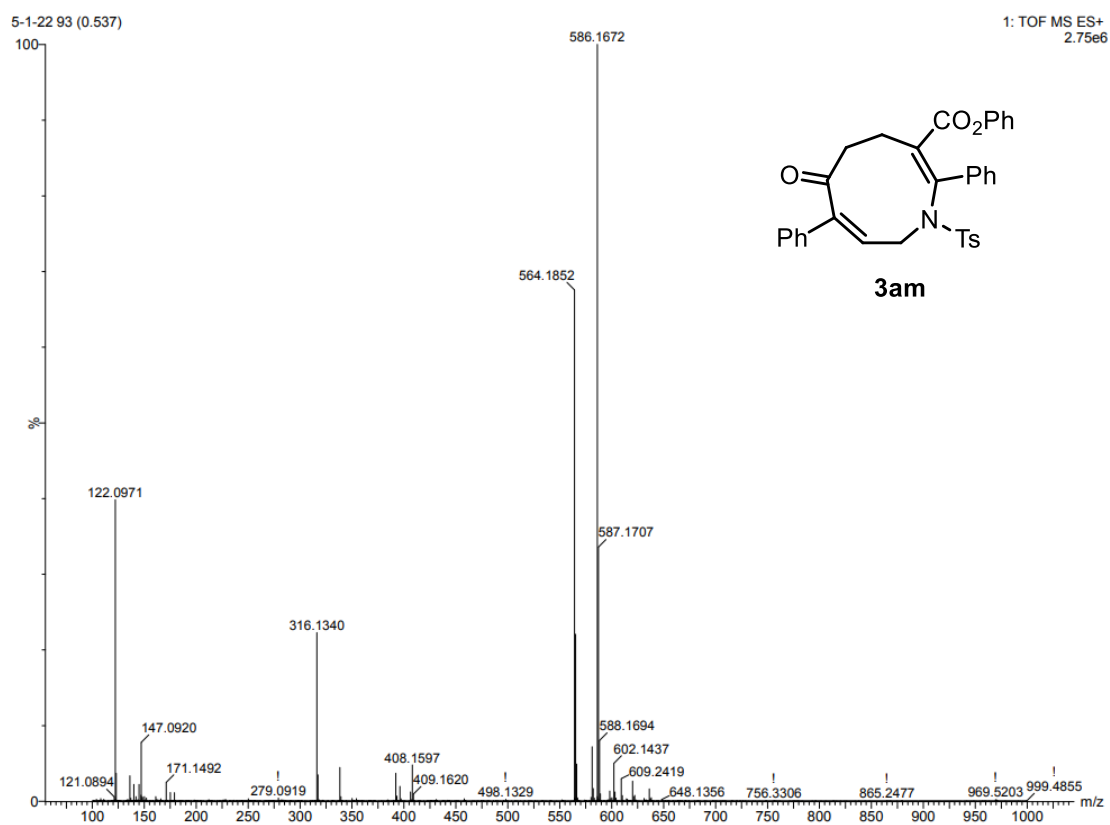

## <sup>1</sup>H NMR (400 MHz, CDCl<sub>3</sub>) of **3an**

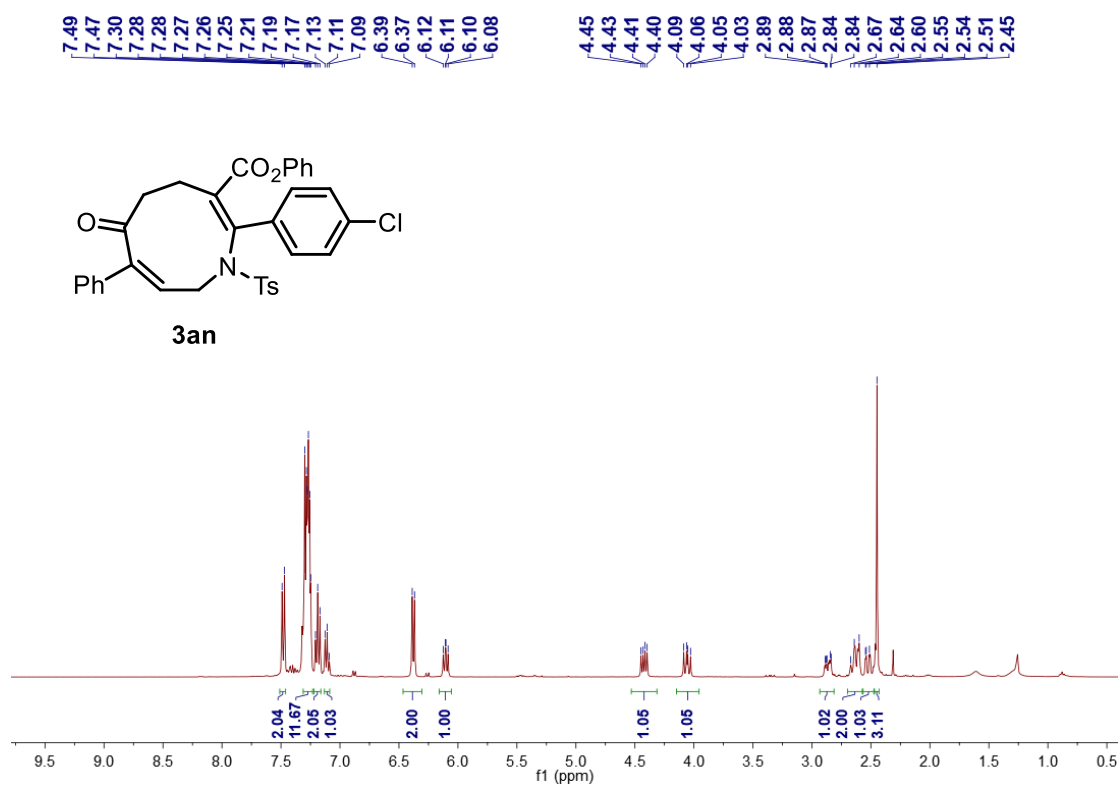

### $^{13}\text{C}$ NMR (100 MHz, $\text{CDCl}_3$ ) of **3an**

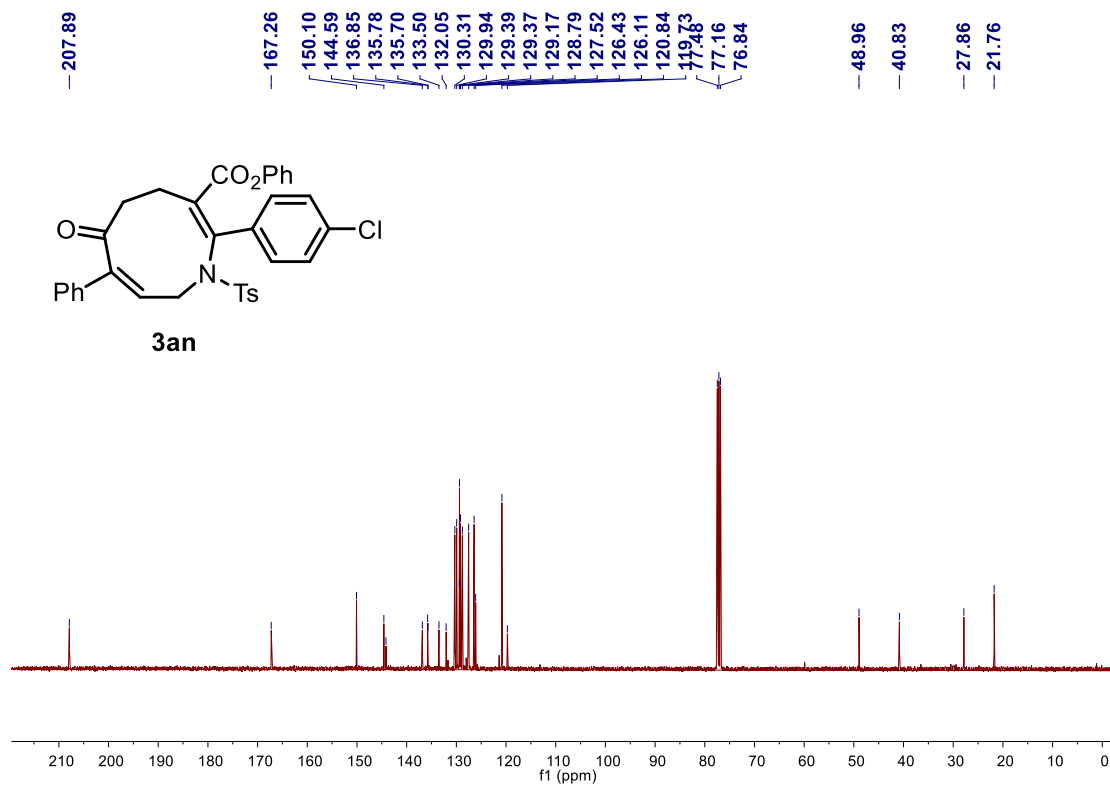

### HRMS of **3an**

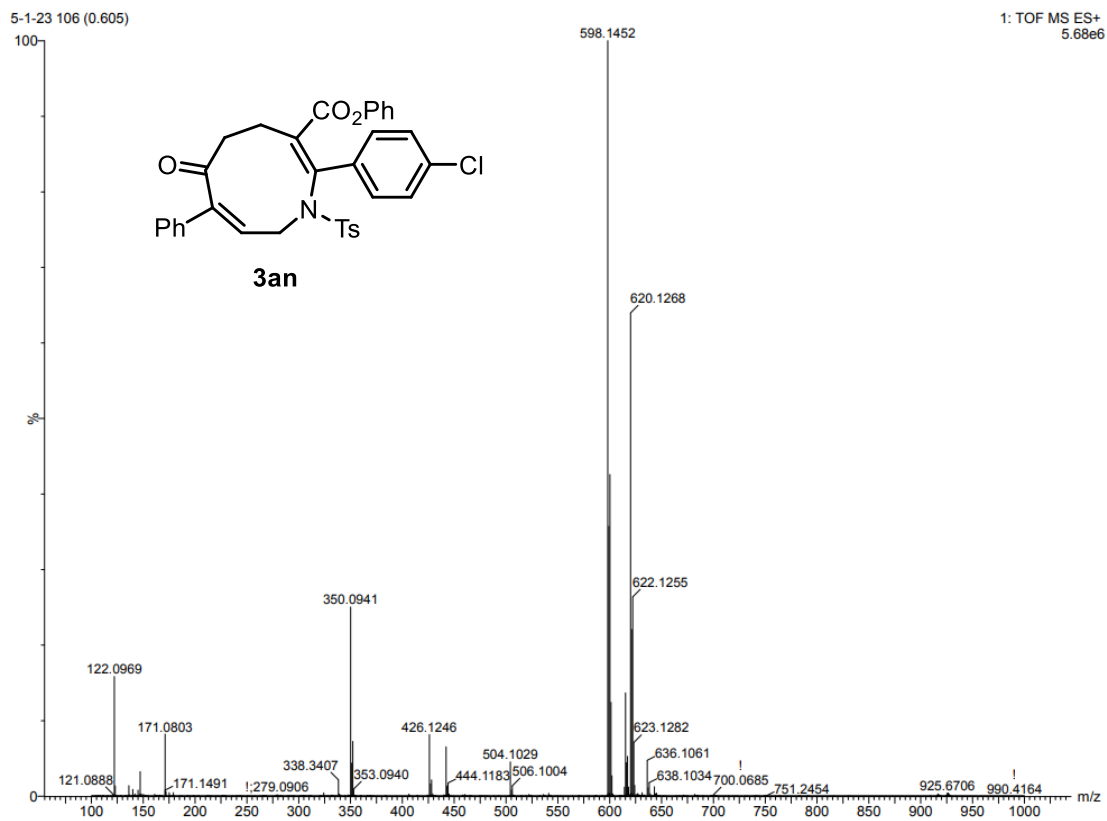

<sup>1</sup>H NMR (400 MHz, CDCl<sub>3</sub>) of **4**

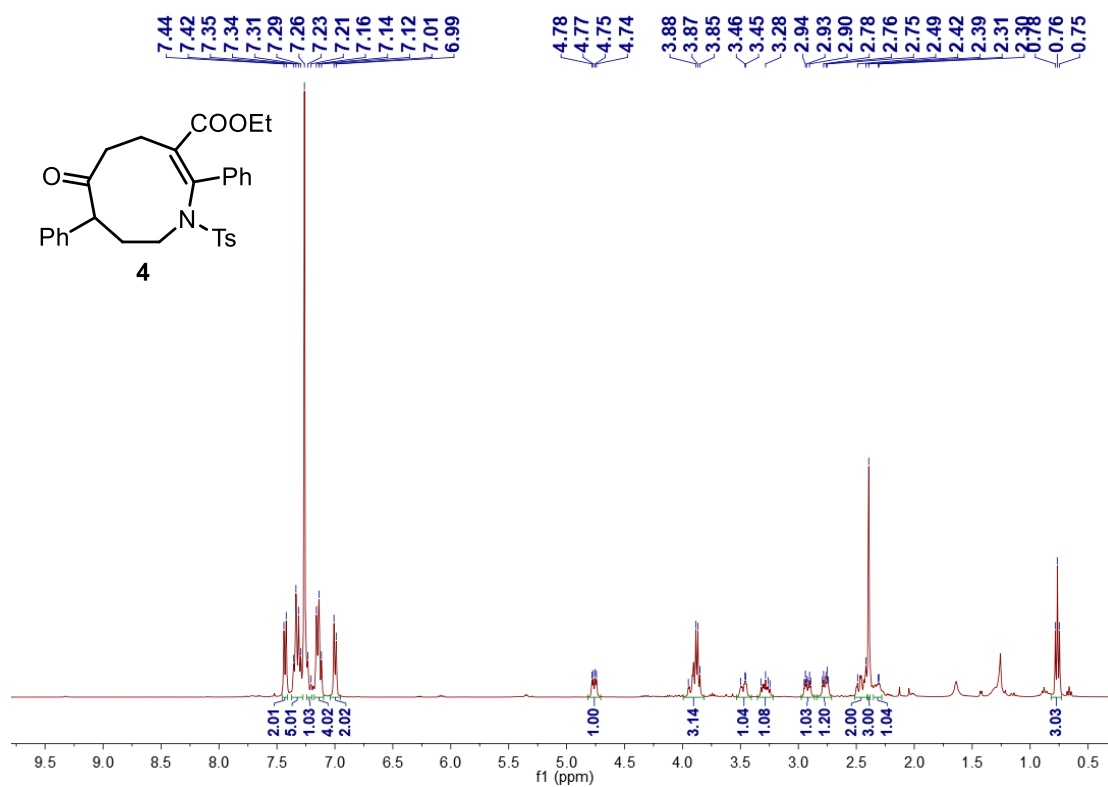

<sup>13</sup>C NMR (100 MHz, CDCl<sub>3</sub>) of **4**

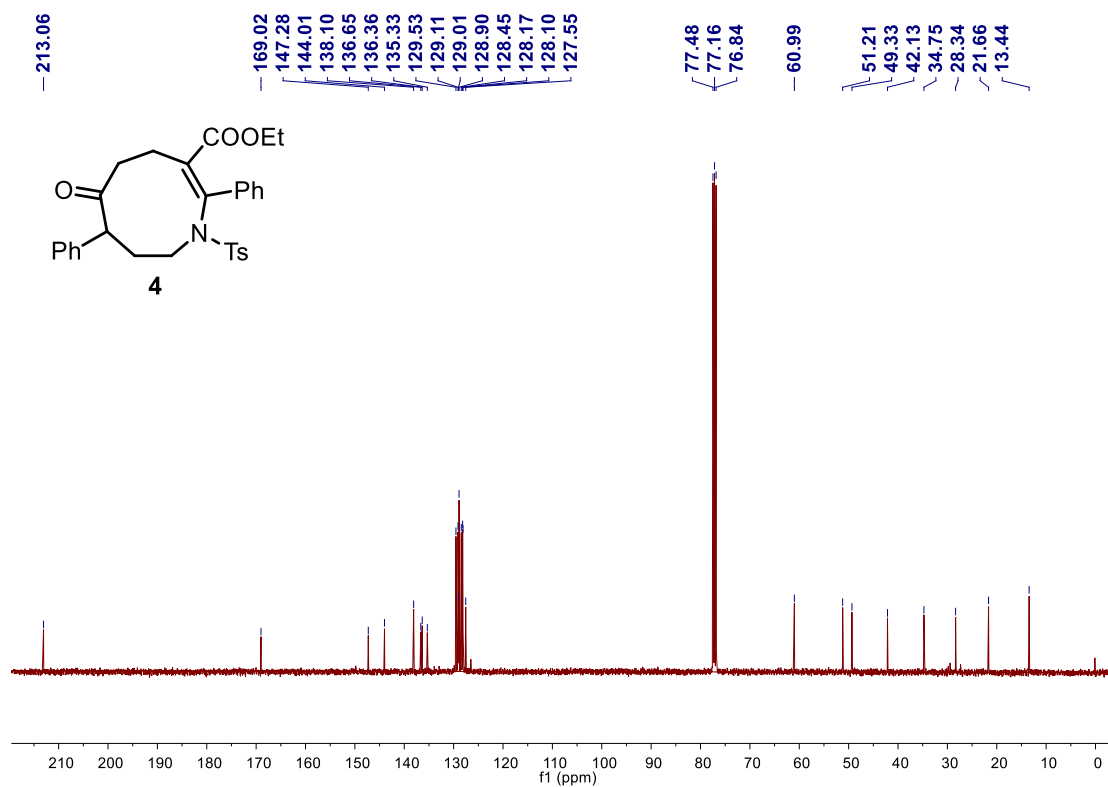

# HRMS of 4

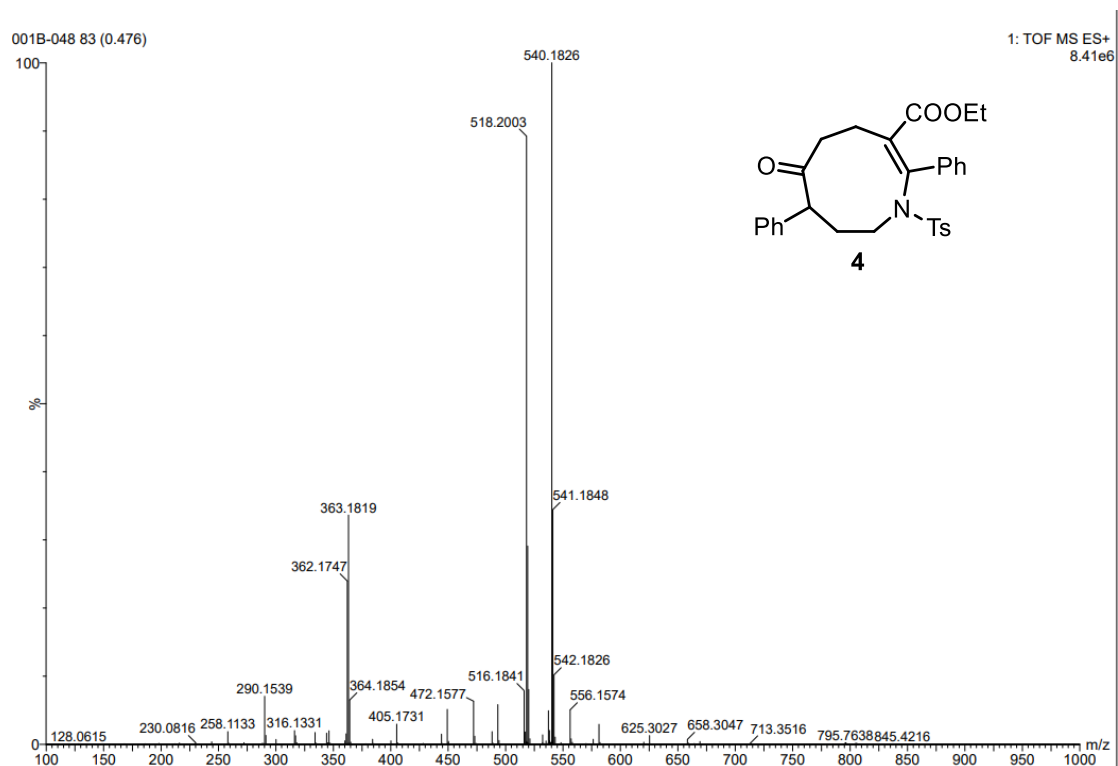

# <sup>1</sup>H NMR (400 MHz, CDCl<sub>3</sub>) of 5

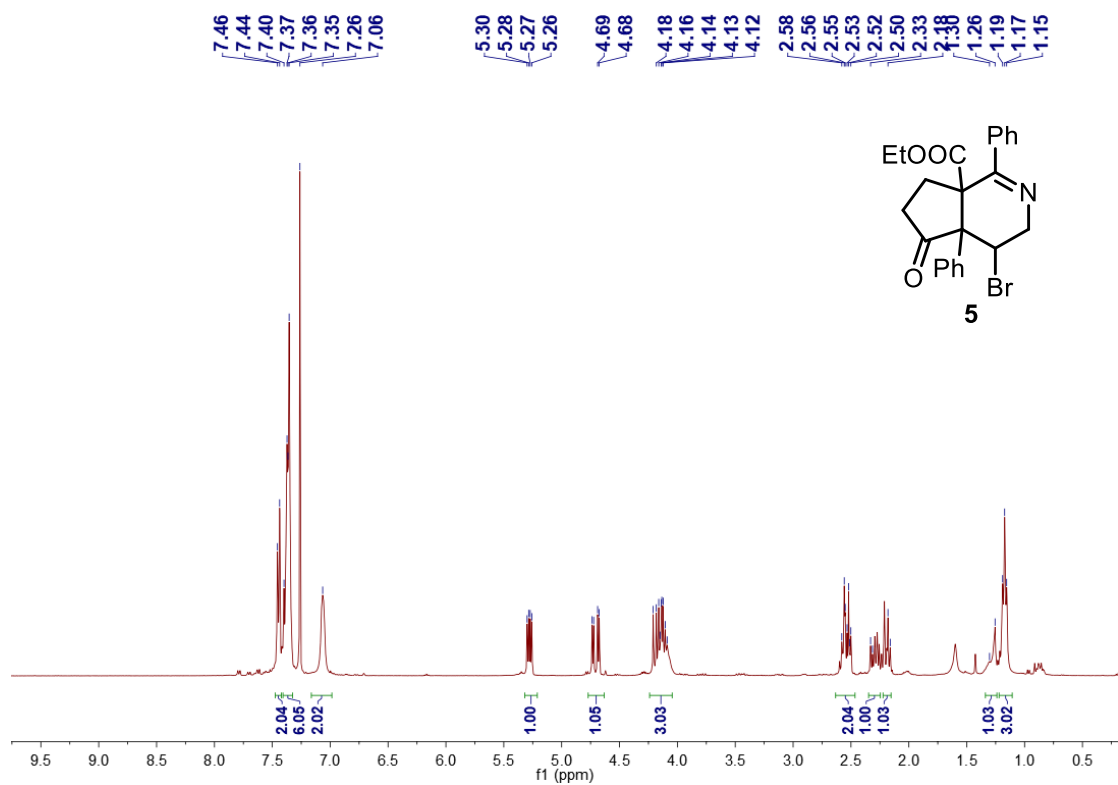



$^{13}\text{C}$  NMR (100 MHz,  $\text{CDCl}_3$ ) of **5**

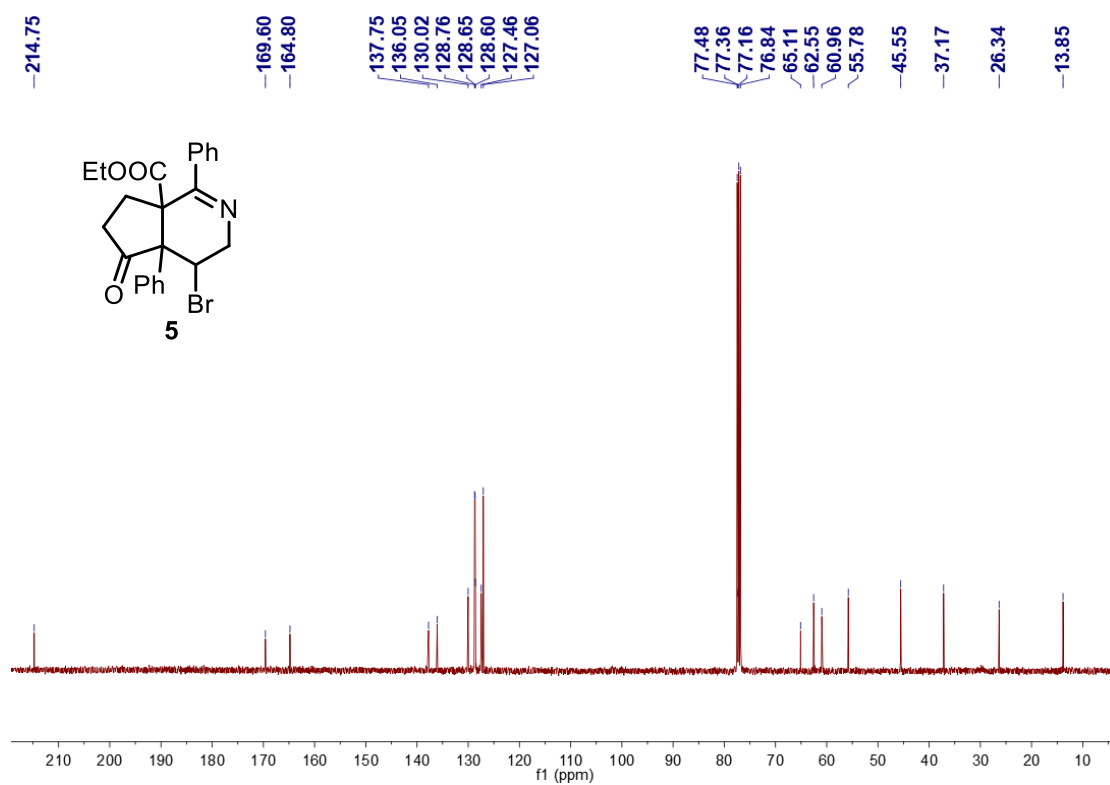

COSY of **5**

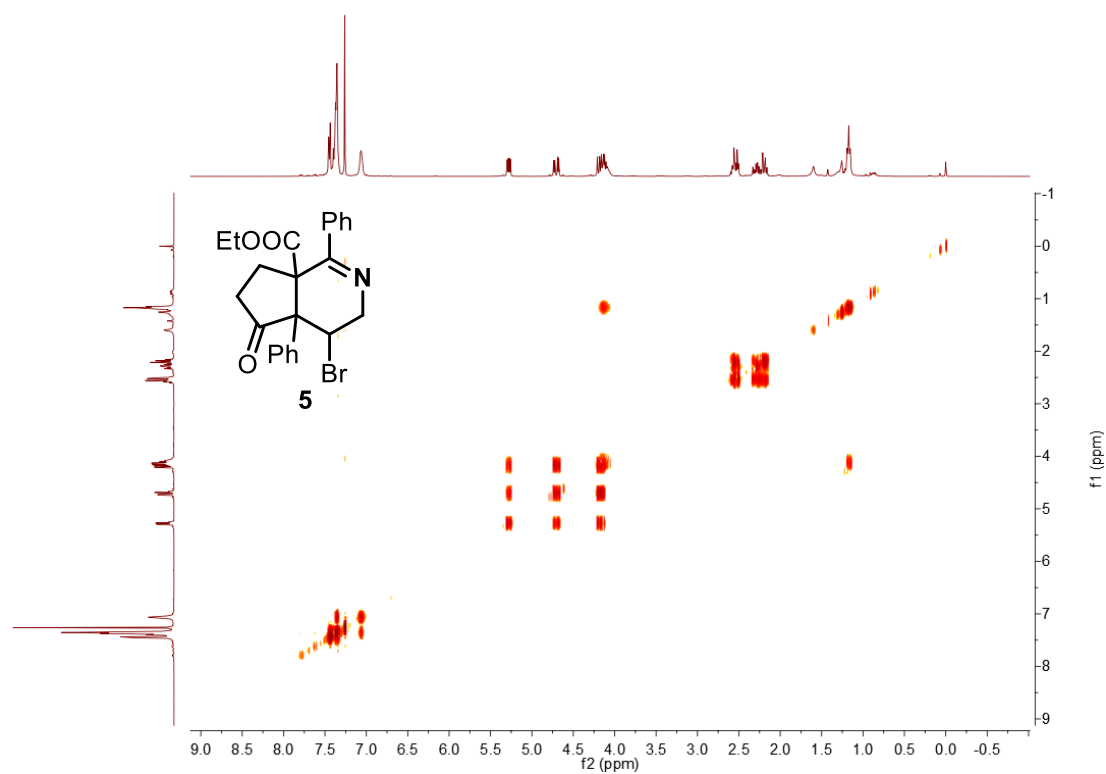

### HSQC of 5

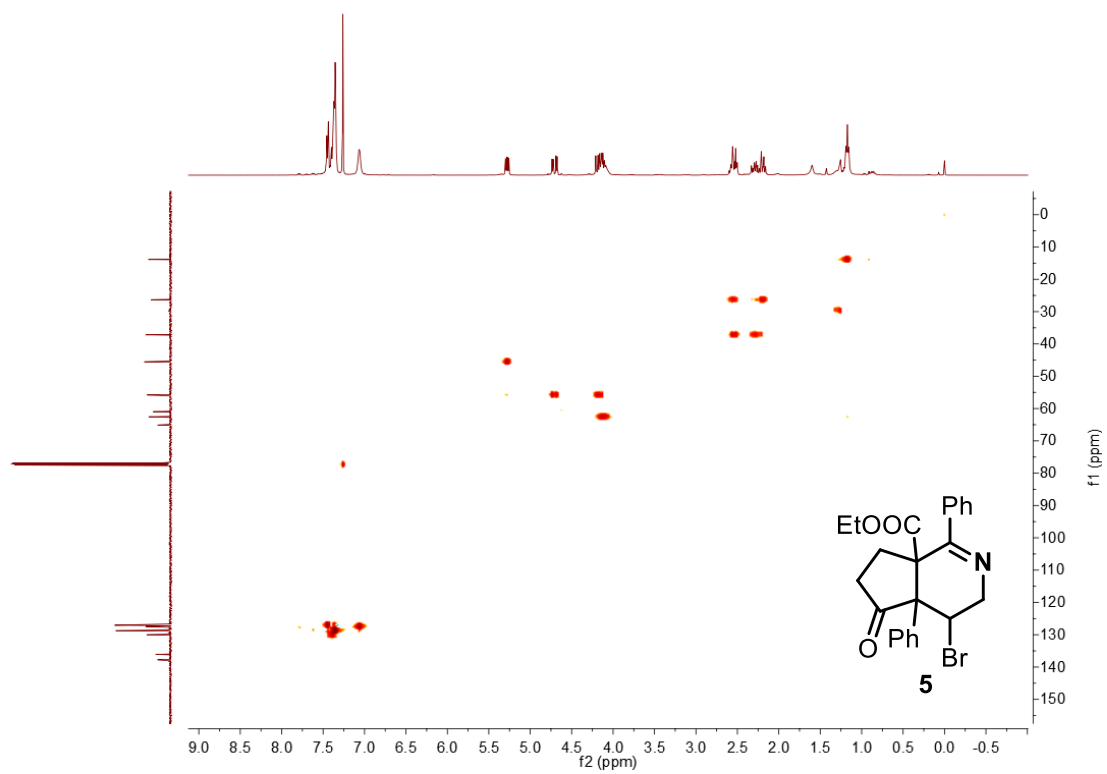

### HMBC of 5

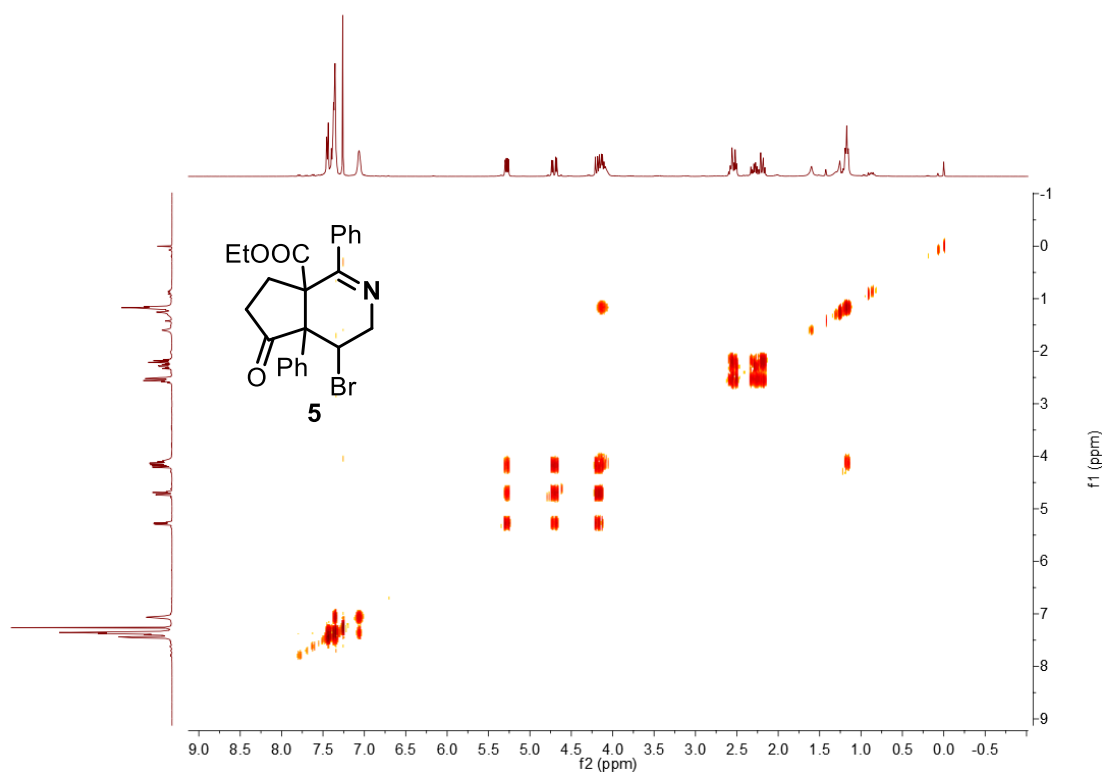

### DEPT135 of 5

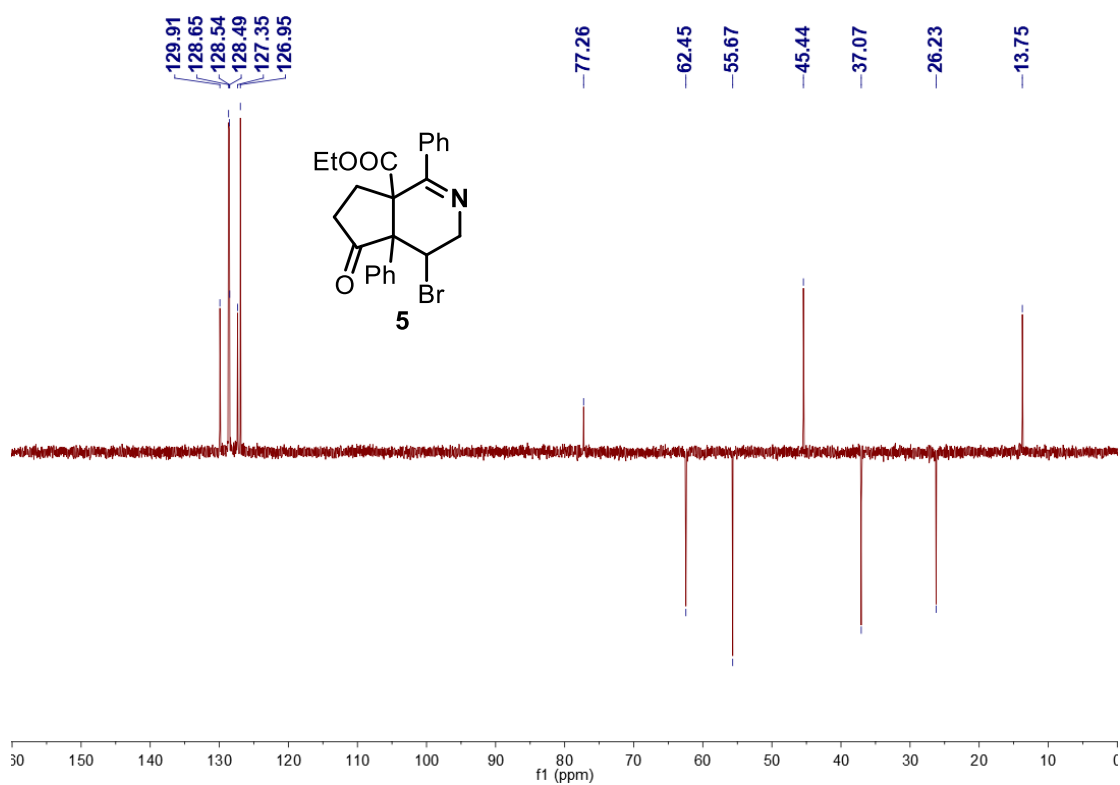

### HRMS of 5

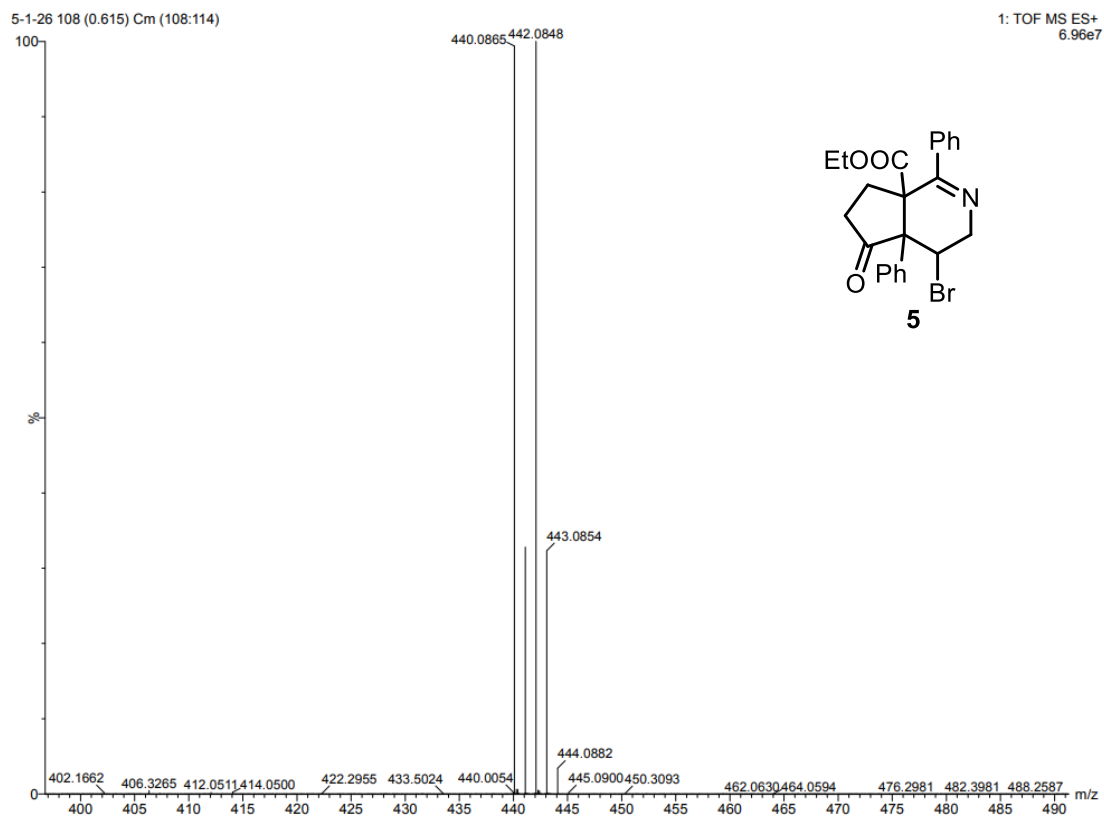

Supplement: d1qo01405f1.pdf [file d1qo01405f1.pdf]
